# Supplementary material for: A Systematic Review and Meta-Analysis of microRNA Profiling Studies in Chronic Kidney Diseases
Source: Noncoding RNA. 2024 May 3;10(3):30. doi: 10.3390/ncrna10030030 (PMC11130806; doi:10.3390/ncrna10030030)
Supplement: Supplementary file 1 [file ncrna-10-00030-s001.zip › Supplementary File S1.xlsx]

## Sheet: DN_kidney
Table S1. Up- and down-regulated miRNAs were reported in kidney tissue of diabetic nephropathy
Down-regulated miRNAs									Up-regulated miRNAs
miRNA	J. Yu, 2019 (DN)	M. A. Baker, 2017 (DN glomeruli/G)	M. A. Baker, 2017 (DN PT)	F. Conserva, 2019 (DN)	Pan Y, 2018 (DN)	Studies with the same direction	Average ranking score	Studies with opposite direction	miRNA	J. Yu, 2019 (DN)	M. A. Baker, 2017 (DN glomeruli/G)	F. Conserva, 2019 (DN)	M. A. Baker, 2017 (DN PT)	Pan Y, 2018 (DN)	Studies with the same direction	Average ranking score	Studies with opposite direction
hsa-miR-486-3p		0.00233645	0.0046729	0.355204		3	0.120738	0	hsa-miR-155-5p			0.0113122	0.00233645		2	0.00682433	1
hsa-miR-30a-5p		0.0186916	0.0257009	0.605204		3	0.216532	1	hsa-miR-186-5p			0.0192308		0.0232044	2	0.0212176	1
hsa-miR-486-5p		0.0046729	0.00700935			2	0.00584112	1	hsa-miR-1299	0.03				0.0209945	2	0.0254972	0
hsa-miR-320b	0.00736842			0.020362		2	0.0138652	0	hsa-miR-95-3p			0.0328054		0.0259669	2	0.0293861	0
hsa-miR-320a-3p	0.0221053			0.0113122		2	0.0167087	0	hsa-miR-150-5p		0.0046729	0.0633484			2	0.0340107	1
hsa-miR-423-5p	0.0178947	0.021028				2	0.0194614	1	hsa-miR-142-5p	0.0468421		0.0486425			2	0.0477423	0
hsa-miR-148a-3p		0.0163551	0.0233645			2	0.0198598	1	hsa-miR-503-5p			0.124434		0.0132597	2	0.068847	0
hsa-miR-30d-5p	0.0363158			0.0147059		2	0.0255108	0	hsa-miR-484	0.0421053		0.11991			2	0.0810074	0
hsa-miR-614				0.0520362	0.000552486	2	0.0262943	0	hsa-miR-30e-5p			0.140271		0.0243094	2	0.0822904	0
hsa-miR-99b-3p	0.000526316			0.0554299		2	0.0279781	0	hsa-miR-450a-5p			0.158371		0.0138122	2	0.0860916	0
hsa-miR-625-3p	0.0142105			0.061086		2	0.0376482	0	hsa-miR-4473	0.000526316					1	0.000526316	0
hsa-miR-574-5p	0.0636842			0.0124434		2	0.0380638	0	hsa-miR-4747-5p	0.00105263					1	0.00105263	0
hsa-let-7b-5p	0.0678947		0.0186916			2	0.0432932	0	hsa-miR-1256					0.00110497	1	0.00110497	1
hsa-miR-1180-3p		0.00700935		0.091629		2	0.0493192	0	hsa-miR-374b-5p			0.00113122			1	0.00113122	1
hsa-miR-106b-3p	0.0236842			0.0882353		2	0.0559598	0	hsa-miR-4531	0.00157895					1	0.00157895	0
hsa-miR-520e-3p	0.0773684			0.050905		2	0.0641367	0	hsa-miR-4256					0.00165746	1	0.00165746	0
hsa-miR-1258	0.00526316			0.127828		2	0.0665456	0	hsa-miR-585-3p	0.00210526					1	0.00210526	0
hsa-let-7c-5p	0.0642105			0.0769231		2	0.0705668	0	hsa-miR-4521					0.00220994	1	0.00220994	0
hsa-miR-1264	0.0163158			0.134615		2	0.0754656	0	hsa-miR-132-3p			0.00226244			1	0.00226244	0
hsa-miR-1301-3p	0.00894737			0.165158		2	0.0870529	0	hsa-miR-4286		0.00233645				1	0.00233645	1
hsa-miR-1976	0.0378947			0.223982		2	0.130938	0	hsa-miR-2116-5p	0.00263158					1	0.00263158	1
hsa-miR-20b-3p	0.08			0.238688		2	0.159344	0	hsa-miR-548ad-3p					0.00276243	1	0.00276243	0
hsa-miR-346	0.0121053			0.308824		2	0.160464	0	hsa-miR-4421	0.00315789					1	0.00315789	0
hsa-miR-302c-5p	0.0557895			0.286199		2	0.170994	0	hsa-miR-548d-3p					0.00331492	1	0.00331492	1
hsa-miR-302e	0.0631579			0.289593		2	0.176375	0	hsa-miR-335-5p			0.00339367			1	0.00339367	0
hsa-miR-422a	0.0310526			0.338235		2	0.184644	0	hsa-miR-3976	0.00368421					1	0.00368421	0
hsa-miR-519e-3p	0.0568421			0.399321		2	0.228082	0	hsa-miR-548d-5p					0.0038674	1	0.0038674	1
hsa-miR-647	0.00315789			0.533937		2	0.268547	0	hsa-miR-4426	0.00421053					1	0.00421053	0
hsa-miR-767-5p	0.0231579			0.563348		2	0.293253	0	hsa-miR-135b-5p			0.00452489			1	0.00452489	0
hsa-miR-891a-5p	0.0205263			0.578054		2	0.29929	0	hsa-miR-4654	0.00473684					1	0.00473684	0
hsa-miR-943	0.00210526			0.598416		2	0.300261	0	hsa-miR-548g-3p					0.00497238	1	0.00497238	1
hsa-let-7d-3p	0.00947368			0.611991		2	0.310732	0	hsa-miR-4709-3p	0.00526316					1	0.00526316	0
hsa-miR-30a-3p		0.0116822		0.615385		2	0.313533	0	hsa-miR-297					0.00552486	1	0.00552486	0
hsa-miR-320c	0.0105263			0.61991		2	0.315218	0	hsa-miR-374a-5p			0.00565611			1	0.00565611	0
hsa-miR-936	0.0436842			0.59276		2	0.318222	0	hsa-miR-630	0.00578947					1	0.00578947	0
hsa-miR-937-3p	0.0573684			0.593891		2	0.32563	0	hsa-let-7e-5p	0.00631579					1	0.00631579	0
hsa-miR-1260a	0.0342105			0.622172		2	0.328191	0	hsa-miR-548aj-3p					0.00662983	1	0.00662983	0
hsa-miR-29a-5p	0.0463158			0.613122		2	0.329719	0	hsa-miR-146b-5p			0.00678733			1	0.00678733	1
hsa-miR-340-3p	0.0410526			0.64819		2	0.344621	1	hsa-miR-4800-3p	0.00684211					1	0.00684211	0
hsa-miR-634	0.0789474			0.61086		2	0.344904	0	hsa-miR-589-5p		0.00700935				1	0.00700935	1
hsa-miR-10a-5p	0.0610526			0.631222		2	0.346137	0	hsa-miR-548o-3p					0.00718232	1	0.00718232	1
hsa-miR-125a-3p	0.00105263					1	0.00105263	0	hsa-miR-3202	0.00736842					1	0.00736842	0
hsa-miR-572				0.00113122		1	0.00113122	0	hsa-miR-4530	0.00789474					1	0.00789474	0
hsa-miR-185-5p	0.00157895					1	0.00157895	1	hsa-miR-222-3p			0.00791855			1	0.00791855	1
hsa-miR-940				0.00226244		1	0.00226244	1	hsa-miR-548q					0.00828729	1	0.00828729	0
hsa-miR-451a			0.00233645			1	0.00233645	1	hsa-miR-652-5p	0.00842105					1	0.00842105	0
hsa-miR-130b-3p	0.00263158					1	0.00263158	1	hsa-miR-4454					0.00883978	1	0.00883978	0
hsa-miR-638				0.00339367		1	0.00339367	0	hsa-miR-520g-3p	0.00894737					1	0.00894737	1
hsa-miR-5581-3p	0.00368421					1	0.00368421	0	hsa-miR-139-5p			0.00904977			1	0.00904977	1
hsa-miR-183-5p	0.00421053					1	0.00421053	1	hsa-miR-149-3p	0.00947368					1	0.00947368	1
hsa-miR-424-3p	0.00473684					1	0.00473684	0	hsa-miR-103a-2-5p					0.00994475	1	0.00994475	1
hsa-miR-1915-3p				0.00565611		1	0.00565611	1	hsa-miR-4682	0.01					1	0.01	0
hsa-miR-23a-5p	0.00578947					1	0.00578947	0	hsa-miR-376c-3p			0.010181			1	0.010181	1
hsa-miR-340-5p	0.00631579					1	0.00631579	0	hsa-miR-1285-3p					0.0104972	1	0.0104972	0
hsa-miR-320d				0.00678733		1	0.00678733	0	hsa-miR-4533	0.0105263					1	0.0105263	0
hsa-miR-4657	0.00684211					1	0.00684211	0	hsa-miR-30a-5p					0.0110497	1	0.0110497	3
hsa-miR-210-3p	0.00789474					1	0.00789474	1	hsa-miR-205-3p	0.0110526					1	0.0110526	1
hsa-miR-1268a				0.00791855		1	0.00791855	0	hsa-miR-490-3p	0.0115789					1	0.0115789	1
hsa-miR-4497	0.00842105					1	0.00842105	0	hsa-miR-548t-5p					0.0116022	1	0.0116022	0
hsa-miR-939-5p				0.00904977		1	0.00904977	0	hsa-miR-4795-5p	0.0121053					1	0.0121053	0
hsa-miR-4301		0.00934579				1	0.00934579	0	hsa-miR-644a					0.0121547	1	0.0121547	1
hsa-miR-16-5p			0.00934579			1	0.00934579	1	hsa-miR-362-3p			0.0124434			1	0.0124434	0
hsa-miR-200c-3p	0.01					1	0.01	0	hsa-miR-103b					0.0127072	1	0.0127072	1
hsa-miR-1228-3p				0.010181		1	0.010181	0	hsa-miR-4443	0.0131579					1	0.0131579	0
hsa-miR-98-5p			0.0116822			1	0.0116822	1	hsa-miR-183-5p			0.0135747			1	0.0135747	1
hsa-miR-4483	0.0126316					1	0.0126316	0	hsa-miR-4644	0.0136842					1	0.0136842	0
hsa-miR-21-5p	0.0131579					1	0.0131579	1	hsa-miR-4478	0.0142105					1	0.0142105	0
hsa-miR-1234-3p				0.0135747		1	0.0135747	0	hsa-miR-652-3p			0.0147059			1	0.0147059	0
hsa-miR-1260b	0.0136842					1	0.0136842	0	hsa-miR-664b-3p	0.0152632					1	0.0152632	0
hsa-miR-30c-2-3p		0.0140187				1	0.0140187	1	hsa-miR-4455	0.0157895					1	0.0157895	0
hsa-miR-181b-5p			0.0140187			1	0.0140187	1	hsa-miR-96-5p			0.0158371			1	0.0158371	0
hsa-miR-3135b	0.0147368					1	0.0147368	0	hsa-miR-548ac					0.0160221	1	0.0160221	0
hsa-miR-378a-3p	0.0152632					1	0.0152632	0	hsa-miR-4726-5p	0.0163158					1	0.0163158	0
hsa-miR-1225-3p				0.0158371		1	0.0158371	0	hsa-miR-548h-5p					0.0165746	1	0.0165746	1
hsa-miR-196a-5p			0.0163551			1	0.0163551	0	hsa-miR-4685-3p	0.0168421					1	0.0168421	0
hsa-miR-501-5p	0.0168421					1	0.0168421	0	hsa-miR-146a-5p			0.0169683			1	0.0169683	1
hsa-miR-1238-3p				0.0169683		1	0.0169683	0	hsa-miR-548c-3p					0.0171271	1	0.0171271	1
hsa-miR-500a-5p	0.0173684					1	0.0173684	0	hsa-miR-1246	0.0173684					1	0.0173684	1
hsa-miR-191-3p				0.0180995		1	0.0180995	0	hsa-miR-548f-3p					0.0176796	1	0.0176796	1
hsa-miR-204-3p	0.0184211					1	0.0184211	0	hsa-miR-4787-5p	0.0178947					1	0.0178947	0
hsa-miR-4286	0.0189474					1	0.0189474	1	hsa-miR-301a-3p			0.0180995			1	0.0180995	0
hsa-miR-1281				0.0192308		1	0.0192308	0	hsa-miR-548an					0.018232	1	0.018232	0
hsa-miR-3621	0.0194737					1	0.0194737	0	hsa-miR-296-3p	0.0184211					1	0.0184211	1
hsa-miR-186-5p	0.02					1	0.02	2	hsa-miR-5047					0.0187845	1	0.0187845	0
hsa-miR-30c-5p			0.021028			1	0.021028	0	hsa-miR-1285-5p	0.0189474					1	0.0189474	0
hsa-miR-589-5p	0.0210526					1	0.0210526	1	hsa-miR-3911					0.019337	1	0.019337	0
hsa-miR-425-3p				0.0214932		1	0.0214932	1	hsa-miR-371b-5p	0.0194737					1	0.0194737	0
hsa-miR-139-5p	0.0215789					1	0.0215789	1	hsa-miR-548w					0.0198895	1	0.0198895	0
hsa-miR-766-3p				0.0226244		1	0.0226244	0	hsa-miR-4708-3p	0.02					1	0.02	0
hsa-miR-155-5p	0.0226316					1	0.0226316	2	hsa-miR-505-3p			0.020362			1	0.020362	1
hsa-miR-3184-3p		0.0233645				1	0.0233645	1	hsa-miR-3671					0.020442	1	0.020442	0
hsa-miR-1237-3p				0.0237557		1	0.0237557	0	hsa-miR-5189-5p	0.0205263					1	0.0205263	0
hsa-miR-4768-3p	0.0247368					1	0.0247368	0	hsa-miR-890	0.0210526					1	0.0210526	1
hsa-miR-4288	0.0252632					1	0.0252632	0	hsa-miR-17-3p			0.0214932			1	0.0214932	0
hsa-miR-4311	0.0257895					1	0.0257895	0	hsa-miR-570-3p					0.021547	1	0.021547	1
hsa-miR-1825				0.0260181		1	0.0260181	0	hsa-miR-3120-3p					0.0220994	1	0.0220994	0
hsa-miR-4775	0.0268421					1	0.0268421	0	hsa-miR-1915-3p	0.0221053					1	0.0221053	1
hsa-miR-1275				0.0271493		1	0.0271493	0	hsa-miR-361-3p			0.0226244			1	0.0226244	0
hsa-miR-375-3p	0.0273684					1	0.0273684	0	hsa-miR-4508	0.0226316					1	0.0226316	0
hsa-miR-181d-5p	0.0278947					1	0.0278947	1	hsa-miR-612					0.0226519	1	0.0226519	1
hsa-miR-933				0.0282805		1	0.0282805	0	hsa-miR-186-3p	0.0231579					1	0.0231579	1
hsa-miR-4328	0.0284211					1	0.0284211	0	hsa-miR-3960	0.0236842					1	0.0236842	0
hsa-miR-22-5p	0.0289474					1	0.0289474	1	hsa-miR-377-3p			0.0237557			1	0.0237557	0
hsa-miR-483-3p				0.0294118		1	0.0294118	0	hsa-miR-604					0.0237569	1	0.0237569	1
hsa-miR-4714-5p	0.0294737					1	0.0294737	0	hsa-miR-3940-5p	0.0242105					1	0.0242105	0
hsa-miR-5701	0.03					1	0.03	0	hsa-miR-4472	0.0247368					1	0.0247368	0
hsa-miR-1273c	0.0305263					1	0.0305263	0	hsa-miR-548k					0.0248619	1	0.0248619	1
hsa-miR-885-5p				0.030543		1	0.030543	0	hsa-miR-126-5p			0.0248869			1	0.0248869	0
hsa-let-7i-3p				0.0316742		1	0.0316742	0	hsa-miR-4804-3p	0.0252632					1	0.0252632	0
hsa-miR-5571-5p	0.0321053					1	0.0321053	0	hsa-miR-548a-3p					0.0254144	1	0.0254144	1
hsa-miR-125a-5p	0.0326316					1	0.0326316	0	hsa-miR-152-3p			0.0260181			1	0.0260181	0
hsa-miR-1182				0.0328054		1	0.0328054	0	hsa-miR-3158-5p	0.0263158					1	0.0263158	0
hsa-miR-141-3p	0.0331579					1	0.0331579	1	hsa-miR-421					0.0265193	1	0.0265193	1
hsa-miR-4711-3p	0.0336842					1	0.0336842	0	hsa-miR-4725-5p	0.0268421					1	0.0268421	0
hsa-miR-1287-5p				0.0339367		1	0.0339367	0	hsa-miR-3916					0.0270718	1	0.0270718	0
hsa-miR-3649	0.0347368					1	0.0347368	0	hsa-miR-210-3p			0.0271493			1	0.0271493	1
hsa-miR-15a-3p				0.0350679		1	0.0350679	0	hsa-miR-938	0.0273684					1	0.0273684	1
hsa-miR-3135a	0.0352632					1	0.0352632	0	hsa-miR-4263					0.0276243	1	0.0276243	0
hsa-miR-181c-3p				0.0361991		1	0.0361991	0	hsa-miR-335-3p	0.0278947					1	0.0278947	1
hsa-miR-188-3p				0.0373303		1	0.0373303	0	hsa-miR-3975					0.0281768	1	0.0281768	0
hsa-miR-4765	0.0373684					1	0.0373684	0	hsa-miR-128-3p			0.0282805			1	0.0282805	0
hsa-miR-222-3p	0.0384211					1	0.0384211	1	hsa-miR-758-5p	0.0284211					1	0.0284211	0
hsa-miR-1909-5p				0.0384615		1	0.0384615	0	hsa-miR-4275					0.0287293	1	0.0287293	0
hsa-miR-502-3p	0.0389474					1	0.0389474	1	hsa-miR-3184-3p	0.0289474					1	0.0289474	1
hsa-miR-4500	0.0394737					1	0.0394737	0	hsa-miR-454-3p			0.0294118			1	0.0294118	0
hsa-miR-298				0.0395928		1	0.0395928	0	hsa-miR-4308	0.0294737					1	0.0294737	0
hsa-miR-4297	0.04					1	0.04	0	hsa-miR-4777-5p	0.0305263					1	0.0305263	0
hsa-miR-339-5p				0.040724		1	0.040724	0	hsa-miR-199b-5p			0.030543			1	0.030543	0
hsa-miR-151a-3p	0.0415789					1	0.0415789	1	hsa-miR-4698	0.0310526					1	0.0310526	0
hsa-miR-365a-5p				0.0418552		1	0.0418552	0	hsa-miR-506-5p	0.0315789					1	0.0315789	0
hsa-miR-4268	0.0426316					1	0.0426316	0	hsa-miR-185-5p			0.0316742			1	0.0316742	1
hsa-miR-409-5p				0.0429864		1	0.0429864	0	hsa-miR-4632-3p	0.0321053					1	0.0321053	0
hsa-miR-34a-5p	0.0431579					1	0.0431579	1	hsa-miR-5004-3p	0.0326316					1	0.0326316	0
hsa-miR-410-3p				0.0441176		1	0.0441176	0	hsa-miR-548ap-5p	0.0331579					1	0.0331579	0
hsa-miR-194-3p	0.0442105					1	0.0442105	0	hsa-miR-5580-3p	0.0336842					1	0.0336842	0
hsa-miR-4431	0.0447368					1	0.0447368	0	hsa-miR-145-3p			0.0339367			1	0.0339367	1
hsa-miR-449a				0.0452489		1	0.0452489	0	hsa-miR-3180-5p	0.0342105					1	0.0342105	0
hsa-miR-221-3p	0.0452632					1	0.0452632	1	hsa-miR-4292	0.0347368					1	0.0347368	0
hsa-miR-146b-5p	0.0457895					1	0.0457895	1	hsa-miR-502-3p			0.0350679			1	0.0350679	1
hsa-miR-498-5p				0.0463801		1	0.0463801	0	hsa-miR-659-3p	0.0352632					1	0.0352632	1
hsa-miR-146a-5p	0.0468421					1	0.0468421	1	hsa-miR-4658	0.0357895					1	0.0357895	0
hsa-miR-193b-3p	0.0473684					1	0.0473684	0	hsa-miR-31-5p			0.0361991			1	0.0361991	0
hsa-miR-507				0.0475113		1	0.0475113	0	hsa-miR-32-3p	0.0363158					1	0.0363158	1
hsa-miR-2392	0.0478947					1	0.0478947	0	hsa-miR-548at-5p	0.0368421					1	0.0368421	0
hsa-miR-4317	0.0484211					1	0.0484211	0	hsa-miR-425-3p			0.0373303			1	0.0373303	1
hsa-miR-508-5p				0.0486425		1	0.0486425	0	hsa-miR-629-3p	0.0373684					1	0.0373684	1
hsa-miR-4735-5p	0.0494737					1	0.0494737	0	hsa-miR-18b-3p	0.0378947					1	0.0378947	1
hsa-miR-520b-3p				0.0497738		1	0.0497738	0	hsa-miR-127-3p			0.0384615			1	0.0384615	0
hsa-miR-125b-5p	0.05					1	0.05	1	hsa-miR-486-5p	0.0394737					1	0.0394737	2
hsa-miR-145-3p	0.0505263					1	0.0505263	1	hsa-miR-542-3p			0.0395928			1	0.0395928	0
hsa-miR-4728-3p	0.0510526					1	0.0510526	0	hsa-miR-4456	0.0405263					1	0.0405263	0
hsa-miR-92a-3p	0.0515789					1	0.0515789	1	hsa-miR-376a-3p			0.040724			1	0.040724	0
hsa-miR-505-3p	0.0521053					1	0.0521053	1	hsa-miR-208a-5p	0.0410526					1	0.0410526	0
hsa-miR-193b-5p	0.0526316					1	0.0526316	0	hsa-miR-21-3p			0.0418552			1	0.0418552	1
hsa-miR-3664-3p	0.0531579					1	0.0531579	0	hsa-miR-518e-5p	0.0426316					1	0.0426316	1
hsa-miR-21-3p	0.0536842					1	0.0536842	1	hsa-miR-590-5p			0.0429864			1	0.0429864	0
hsa-miR-376c-3p	0.0542105					1	0.0542105	1	hsa-miR-4748	0.0431579					1	0.0431579	0
hsa-miR-769-3p				0.0542986		1	0.0542986	0	hsa-miR-183-3p	0.0436842					1	0.0436842	1
hsa-miR-4753-5p	0.0547368					1	0.0547368	0	hsa-miR-31-3p			0.0441176			1	0.0441176	0
hsa-miR-433-5p	0.0563158					1	0.0563158	0	hsa-miR-519e-5p	0.0447368					1	0.0447368	1
hsa-miR-1236-3p				0.0565611		1	0.0565611	0	hsa-miR-181c-5p			0.0452489			1	0.0452489	0
hsa-miR-34a-3p				0.0576923		1	0.0576923	0	hsa-miR-4747-3p	0.0452632					1	0.0452632	0
hsa-let-7g-5p	0.0578947					1	0.0578947	0	hsa-miR-4707-3p	0.0457895					1	0.0457895	0
hsa-miR-181a-5p	0.0584211					1	0.0584211	1	hsa-miR-5195-5p	0.0463158					1	0.0463158	0
hsa-miR-663b				0.0588235		1	0.0588235	0	hsa-miR-501-3p			0.0463801			1	0.0463801	0
hsa-miR-3161	0.0589474					1	0.0589474	0	hsa-miR-3686	0.0473684					1	0.0473684	0
hsa-miR-4471	0.0594737					1	0.0594737	0	hsa-miR-218-5p			0.0475113			1	0.0475113	0
hsa-miR-138-5p				0.0599548		1	0.0599548	0	hsa-miR-3182	0.0478947					1	0.0478947	0
hsa-miR-23a-3p	0.06					1	0.06	1	hsa-miR-485-3p	0.0484211					1	0.0484211	1
hsa-miR-4255	0.0615789					1	0.0615789	0	hsa-miR-3162-3p	0.0489474					1	0.0489474	0
hsa-miR-574-3p	0.0621053					1	0.0621053	1	hsa-miR-4787-3p	0.0494737					1	0.0494737	0
hsa-miR-1227-3p				0.0622172		1	0.0622172	0	hsa-miR-21-5p			0.0497738			1	0.0497738	1
hsa-miR-4797-5p	0.0626316					1	0.0626316	0	hsa-miR-1185-2-3p	0.05					1	0.05	0
hsa-miR-1307-3p				0.0633484		1	0.0633484	0	hsa-let-7a-5p			0.050905			1	0.050905	1
hsa-miR-339-3p				0.0644796		1	0.0644796	0	hsa-miR-4433a-5p	0.0510526					1	0.0510526	0
hsa-miR-4451	0.0647368					1	0.0647368	0	hsa-miR-3972	0.0515789					1	0.0515789	0
hsa-miR-150-5p	0.0652632					1	0.0652632	2	hsa-let-7f-5p			0.0520362			1	0.0520362	0
hsa-miR-563				0.0656109		1	0.0656109	0	hsa-miR-373-5p	0.0521053					1	0.0521053	1
hsa-miR-4646-5p	0.0657895					1	0.0657895	0	hsa-miR-345-3p	0.0526316					1	0.0526316	0
hsa-miR-4300	0.0663158					1	0.0663158	0	hsa-miR-1470	0.0531579					1	0.0531579	1
hsa-miR-1229-3p				0.0667421		1	0.0667421	0	hsa-let-7i			0.0531674			1	0.0531674	0
hsa-miR-30e-3p	0.0668421					1	0.0668421	1	hsa-miR-1247-5p	0.0536842					1	0.0536842	1
hsa-miR-877-3p	0.0673684					1	0.0673684	0	hsa-miR-4795-3p	0.0542105					1	0.0542105	0
hsa-miR-1539				0.0678733		1	0.0678733	0	hsa-miR-195-5p			0.0542986			1	0.0542986	0
hsa-let-7a-5p	0.0684211					1	0.0684211	1	hsa-miR-1249-3p	0.0547368					1	0.0547368	0
hsa-miR-7-5p	0.0689474					1	0.0689474	0	hsa-miR-874-5p	0.0552632					1	0.0552632	0
hsa-miR-2116-3p				0.0690045		1	0.0690045	0	hsa-miR-16-5p			0.0554299			1	0.0554299	1
hsa-miR-374b-5p	0.0694737					1	0.0694737	1	hsa-miR-4258	0.0557895					1	0.0557895	0
hsa-miR-4524b-5p	0.07					1	0.07	0	hsa-miR-4764-5p	0.0563158					1	0.0563158	0
hsa-miR-296-5p				0.0701357		1	0.0701357	0	hsa-miR-29a-3p			0.0565611			1	0.0565611	0
hsa-miR-4725-3p	0.0705263					1	0.0705263	0	hsa-miR-4475	0.0568421					1	0.0568421	0
hsa-miR-3915	0.0710526					1	0.0710526	0	hsa-miR-940	0.0573684					1	0.0573684	1
hsa-miR-602				0.071267		1	0.071267	0	hsa-miR-199a-3p			0.0576923			1	0.0576923	0
hsa-miR-301a-5p	0.0715789					1	0.0715789	0	hsa-miR-4467	0.0578947					1	0.0578947	0
hsa-miR-4668-5p	0.0721053					1	0.0721053	0	hsa-miR-4687-5p	0.0584211					1	0.0584211	0
hsa-miR-92b-3p				0.0723982		1	0.0723982	0	hsa-miR-142-3p			0.0588235			1	0.0588235	0
hsa-miR-532-3p	0.0726316					1	0.0726316	1	hsa-let-7g			0.0599548			1	0.0599548	0
hsa-miR-103a-3p	0.0731579					1	0.0731579	1	hsa-miR-23a-3p			0.061086			1	0.061086	1
hsa-miR-133a-3p				0.0735294		1	0.0735294	0	hsa-miR-1-3p			0.0622172			1	0.0622172	0
hsa-miR-3924	0.0736842					1	0.0736842	0	hsa-miR-136-5p			0.0644796			1	0.0644796	0
hsa-miR-365a-3p	0.0742105					1	0.0742105	0	hsa-miR-126-3p			0.0656109			1	0.0656109	0
hsa-miR-665				0.0746606		1	0.0746606	0	hsa-miR-29b-3p			0.0667421			1	0.0667421	0
hsa-miR-4716-5p	0.0747368					1	0.0747368	0	hsa-miR-19b-3p			0.0678733			1	0.0678733	0
hsa-miR-337-5p	0.0752632					1	0.0752632	0	hsa-miR-19a-3p			0.0690045			1	0.0690045	0
hsa-miR-3907	0.0757895					1	0.0757895	0	hsa-miR-223-3p			0.0701357			1	0.0701357	0
hsa-let-7a-3p				0.0757919		1	0.0757919	0	hsa-miR-29c-3p			0.071267			1	0.071267	0
hsa-miR-4273	0.0768421					1	0.0768421	0	hsa-miR-193a-3p			0.0723982			1	0.0723982	0
hsa-miR-4669	0.0778947					1	0.0778947	0	hsa-miR-26a-5p			0.0735294			1	0.0735294	0
hsa-let-7e-3p				0.0780543		1	0.0780543	0	hsa-miR-24-1-5p			0.0746606			1	0.0746606	0
hsa-miR-4285	0.0784211					1	0.0784211	0	hsa-miR-130a-3p			0.0757919			1	0.0757919	0
hsa-let-7f-2-3p				0.0791855		1	0.0791855	0	hsa-miR-24-3p			0.0769231			1	0.0769231	0
hsa-miR-378d	0.0794737					1	0.0794737	0	hsa-miR-99a-5p			0.0780543			1	0.0780543	0
hsa-let-7g-3p				0.0803167		1	0.0803167	0	hsa-miR-34a-5p			0.0791855			1	0.0791855	1
hsa-let-7i-5p	0.0810526					1	0.0810526	0	hsa-miR-103a-3p			0.0803167			1	0.0803167	1
hsa-miR-101-5p				0.081448		1	0.081448	0	hsa-let-7b			0.081448			1	0.081448	0
hsa-miR-378b	0.0815789					1	0.0815789	0	hsa-miR-497-5p			0.0825792			1	0.0825792	0
hsa-miR-103a-2-5p				0.0825792		1	0.0825792	1	hsa-miR-106b-5p			0.0837104			1	0.0837104	0
hsa-miR-103b				0.0837104		1	0.0837104	1	hsa-miR-26b-5p			0.0848416			1	0.0848416	0
hsa-miR-105-5p				0.0848416		1	0.0848416	0	hsa-miR-199a-5p			0.0859729			1	0.0859729	0
hsa-miR-105-3p				0.0859729		1	0.0859729	0	hsa-miR-125b-5p			0.0871041			1	0.0871041	1
hsa-miR-106a-3p				0.0871041		1	0.0871041	0	hsa-miR-25-3p			0.0882353			1	0.0882353	0
hsa-miR-1178-3p				0.0893665		1	0.0893665	0	hsa-miR-429			0.0893665			1	0.0893665	0
hsa-miR-1179				0.0904977		1	0.0904977	0	hsa-miR-455-5p			0.0904977			1	0.0904977	0
hsa-miR-1184				0.0927602		1	0.0927602	0	hsa-miR-34b-5p			0.091629			1	0.091629	1
hsa-miR-1185-5p				0.0938914		1	0.0938914	0	hsa-miR-93-5p			0.0927602			1	0.0927602	0
hsa-miR-1197				0.0950226		1	0.0950226	0	hsa-miR-143-3p			0.0938914			1	0.0938914	0
hsa-miR-1200				0.0961538		1	0.0961538	0	hsa-miR-342-3p			0.0950226			1	0.0950226	0
hsa-miR-1203				0.0984163		1	0.0984163	0	hsa-miR-542-5p			0.0961538			1	0.0961538	0
hsa-miR-1204				0.0995475		1	0.0995475	0	hsa-miR-130b-3p			0.0972851			1	0.0972851	1
hsa-miR-1205				0.100679		1	0.100679	0	hsa-miR-664a-3p			0.0984163			1	0.0984163	0
hsa-miR-1206				0.10181		1	0.10181	0	hsa-miR-17-5p			0.0995475			1	0.0995475	0
hsa-miR-1207-3p				0.102941		1	0.102941	0	hsa-miR-29c-5p			0.100679			1	0.100679	0
hsa-miR-1208				0.104072		1	0.104072	0	hsa-miR-340-3p			0.10181			1	0.10181	2
hsa-miR-122-5p				0.105204		1	0.105204	0	hsa-miR-342-5p			0.102941			1	0.102941	0
hsa-miR-122-3p				0.106335		1	0.106335	0	hsa-miR-101-3p			0.104072			1	0.104072	0
hsa-miR-1224-3p				0.107466		1	0.107466	0	hsa-miR-489-3p			0.105204			1	0.105204	0
hsa-miR-1228-5p				0.108597		1	0.108597	0	hsa-miR-200a-3p			0.106335			1	0.106335	0
hsa-miR-1231				0.109729		1	0.109729	0	hsa-miR-15a-5p			0.107466			1	0.107466	0
hsa-miR-1233-3p				0.11086		1	0.11086	0	hsa-miR-660-5p			0.108597			1	0.108597	0
hsa-miR-124-5p				0.111991		1	0.111991	0	hsa-miR-148a-3p			0.109729			1	0.109729	2
hsa-miR-1243				0.113122		1	0.113122	0	hsa-miR-214-3p			0.11086			1	0.11086	0
hsa-miR-1244				0.114253		1	0.114253	0	hsa-miR-193a-5p			0.111991			1	0.111991	0
hsa-miR-1245a				0.115385		1	0.115385	0	hsa-miR-28-5p			0.113122			1	0.113122	0
hsa-miR-1247-5p				0.116516		1	0.116516	1	hsa-miR-140-3p			0.114253			1	0.114253	0
hsa-miR-1248				0.117647		1	0.117647	0	hsa-miR-129-1-3p			0.115385			1	0.115385	0
hsa-miR-1250-5p				0.118778		1	0.118778	0	hsa-miR-20a-5p			0.116516			1	0.116516	0
hsa-miR-1251-5p				0.11991		1	0.11991	0	hsa-miR-15b-5p			0.117647			1	0.117647	0
hsa-miR-1252-5p				0.121041		1	0.121041	0	hsa-miR-100-5p			0.118778			1	0.118778	0
hsa-miR-1253				0.122172		1	0.122172	0	hsa-miR-148b-3p			0.121041			1	0.121041	0
hsa-miR-1255b-5p				0.124434		1	0.124434	0	hsa-miR-718			0.122172			1	0.122172	0
hsa-miR-1256				0.125566		1	0.125566	1	hsa-miR-200b-5p			0.123303			1	0.123303	0
hsa-miR-1257				0.126697		1	0.126697	0	hsa-miR-133b			0.125566			1	0.125566	0
hsa-miR-125b-1-3p				0.13009		1	0.13009	0	hsa-miR-532-5p			0.126697			1	0.126697	0
hsa-miR-1261				0.131222		1	0.131222	0	hsa-miR-20b-5p			0.127828			1	0.127828	0
hsa-miR-1262				0.132353		1	0.132353	0	hsa-miR-487b-3p			0.128959			1	0.128959	0
hsa-miR-1263				0.133484		1	0.133484	0	hsa-miR-98-5p			0.13009			1	0.13009	1
hsa-miR-1265				0.135747		1	0.135747	0	hsa-miR-582-5p			0.131222			1	0.131222	0
hsa-miR-1266-5p				0.136878		1	0.136878	0	hsa-miR-181d-5p			0.132353			1	0.132353	1
hsa-miR-1267				0.138009		1	0.138009	0	hsa-miR-221-3p			0.133484			1	0.133484	1
hsa-miR-1269a				0.13914		1	0.13914	0	hsa-miR-361-5p			0.134615			1	0.134615	0
hsa-miR-127-5p				0.140271		1	0.140271	0	hsa-miR-125b-2-3p			0.135747			1	0.135747	0
hsa-miR-1270				0.141403		1	0.141403	0	hsa-miR-196b-5p			0.136878			1	0.136878	0
hsa-miR-1272				0.142534		1	0.142534	0	hsa-miR-151a-3p			0.138009			1	0.138009	1
hsa-miR-1276				0.144796		1	0.144796	0	hsa-miR-141-3p			0.13914			1	0.13914	1
hsa-miR-1277-3p				0.145928		1	0.145928	0	hsa-miR-140-5p			0.141403			1	0.141403	0
hsa-miR-1278				0.147059		1	0.147059	0	hsa-miR-495-3p			0.142534			1	0.142534	0
hsa-miR-1279				0.14819		1	0.14819	0	hsa-miR-22-5p			0.143665			1	0.143665	1
hsa-miR-1282				0.149321		1	0.149321	0	hsa-miR-502-5p			0.144796			1	0.144796	0
hsa-miR-1283				0.150452		1	0.150452	0	hsa-miR-324-5p			0.145928			1	0.145928	0
hsa-miR-1284				0.151584		1	0.151584	0	hsa-miR-181a-5p			0.147059			1	0.147059	1
hsa-miR-1286				0.152715		1	0.152715	0	hsa-miR-363-3p			0.14819			1	0.14819	0
hsa-miR-1289				0.153846		1	0.153846	0	hsa-miR-99b-5p			0.149321			1	0.149321	0
hsa-miR-129-5p				0.154977		1	0.154977	0	hsa-miR-10b-3p			0.150452			1	0.150452	0
hsa-miR-1291				0.156109		1	0.156109	0	hsa-miR-181b-5p			0.151584			1	0.151584	1
hsa-miR-1292-5p				0.15724		1	0.15724	0	hsa-miR-654-3p			0.152715			1	0.152715	0
hsa-miR-1293				0.158371		1	0.158371	0	hsa-miR-574-3p			0.153846			1	0.153846	1
hsa-miR-1294				0.159502		1	0.159502	0	hsa-miR-455-3p			0.154977			1	0.154977	0
hsa-miR-1295a				0.160633		1	0.160633	0	hsa-miR-30e-3p			0.156109			1	0.156109	1
hsa-miR-1296-5p				0.161765		1	0.161765	0	hsa-miR-27a-3p			0.15724			1	0.15724	0
hsa-miR-1297				0.162896		1	0.162896	0	hsa-miR-135a-5p			0.159502			1	0.159502	0
hsa-miR-1298-5p				0.164027		1	0.164027	0	hsa-miR-423-5p			0.160633			1	0.160633	2
hsa-miR-1302				0.16629		1	0.16629	0	hsa-miR-92a-3p			0.161765			1	0.161765	1
hsa-miR-1303				0.167421		1	0.167421	0	hsa-miR-532-3p			0.162896			1	0.162896	1
hsa-miR-1304-5p				0.168552		1	0.168552	0	hsa-miR-362-5p			0.164027			1	0.164027	0
hsa-miR-1306-3p				0.169683		1	0.169683	0	hsa-miR-328-3p			0.165158			1	0.165158	0
hsa-miR-130a-5p				0.170814		1	0.170814	0	hsa-miR-451a			0.167421			1	0.167421	1
hsa-miR-130b-5p				0.171946		1	0.171946	0	hsa-miR-30c-2-3p			0.168552			1	0.168552	1
hsa-miR-1321				0.173077		1	0.173077	0	hsa-miR-500a-3p			0.169683			1	0.169683	0
hsa-miR-1322				0.174208		1	0.174208	0	hsa-miR-324-3p			0.170814			1	0.170814	0
hsa-miR-1323				0.175339		1	0.175339	0
hsa-miR-1324				0.176471		1	0.176471	0
hsa-miR-135b-3p				0.177602		1	0.177602	0
hsa-miR-137-3p				0.178733		1	0.178733	0
hsa-miR-138-1-3p				0.179864		1	0.179864	0
hsa-miR-138-2-3p				0.180995		1	0.180995	0
hsa-miR-144-5p				0.182127		1	0.182127	0
hsa-miR-1468-5p				0.183258		1	0.183258	0
hsa-miR-146a-3p				0.184389		1	0.184389	0
hsa-miR-146b-3p				0.18552		1	0.18552	0
hsa-miR-147a				0.186652		1	0.186652	0
hsa-miR-1470				0.187783		1	0.187783	1
hsa-miR-147b-3p				0.188914		1	0.188914	0
hsa-miR-148a-5p				0.190045		1	0.190045	0
hsa-miR-148b-5p				0.191176		1	0.191176	0
hsa-miR-153-3p				0.192308		1	0.192308	0
hsa-miR-1537-3p				0.193439		1	0.193439	0
hsa-miR-1538				0.19457		1	0.19457	0
hsa-miR-155-3p				0.195701		1	0.195701	0
hsa-miR-15b-3p				0.196833		1	0.196833	0
hsa-miR-16-1-3p				0.197964		1	0.197964	0
hsa-miR-182-5p				0.199095		1	0.199095	0
hsa-miR-182-3p				0.200226		1	0.200226	0
hsa-miR-1827				0.201357		1	0.201357	0
hsa-miR-183-3p				0.202489		1	0.202489	1
hsa-miR-184				0.20362		1	0.20362	0
hsa-miR-185-3p				0.204751		1	0.204751	0
hsa-miR-186-3p				0.205882		1	0.205882	1
hsa-miR-187-3p				0.207014		1	0.207014	0
hsa-miR-187-5p				0.208145		1	0.208145	0
hsa-miR-18a-3p				0.209276		1	0.209276	0
hsa-miR-190a-5p				0.210407		1	0.210407	0
hsa-miR-1908-5p				0.211538		1	0.211538	0
hsa-miR-1909-3p				0.21267		1	0.21267	0
hsa-miR-1910-5p				0.213801		1	0.213801	0
hsa-miR-1911-5p				0.214932		1	0.214932	0
hsa-miR-1911-3p				0.216063		1	0.216063	0
hsa-miR-1912-3p				0.217195		1	0.217195	0
hsa-miR-1913				0.218326		1	0.218326	0
hsa-miR-1914-5p				0.219457		1	0.219457	0
hsa-miR-1915-5p				0.220588		1	0.220588	0
hsa-miR-196a-3p				0.221719		1	0.221719	0
hsa-miR-196b-3p				0.222851		1	0.222851	0
hsa-miR-19a-5p				0.225113		1	0.225113	0
hsa-miR-19b-1-5p				0.226244		1	0.226244	0
hsa-miR-19b-2-5p				0.227376		1	0.227376	0
hsa-miR-200c-5p				0.228507		1	0.228507	0
hsa-miR-202-5p				0.229638		1	0.229638	0
hsa-miR-205-5p				0.230769		1	0.230769	0
hsa-miR-205-3p				0.2319		1	0.2319	1
hsa-miR-2052				0.233032		1	0.233032	0
hsa-miR-2053				0.234163		1	0.234163	0
hsa-miR-206				0.235294		1	0.235294	0
hsa-miR-208a-3p				0.236425		1	0.236425	0
hsa-miR-208b-3p				0.237557		1	0.237557	0
hsa-miR-211-5p				0.239819		1	0.239819	0
hsa-miR-2110				0.24095		1	0.24095	0
hsa-miR-2113				0.242081		1	0.242081	0
hsa-miR-2114-5p				0.243213		1	0.243213	0
hsa-miR-2114-3p				0.244344		1	0.244344	0
hsa-miR-2115-5p				0.245475		1	0.245475	0
hsa-miR-2115-3p				0.246606		1	0.246606	0
hsa-miR-2116-5p				0.247738		1	0.247738	1
hsa-miR-2117				0.248869		1	0.248869	0
hsa-miR-216a-5p				0.25		1	0.25	0
hsa-miR-216b-5p				0.251131		1	0.251131	0
hsa-miR-217-5p				0.252262		1	0.252262	0
hsa-miR-218-1-3p				0.253394		1	0.253394	0
hsa-miR-218-2-3p				0.254525		1	0.254525	0
hsa-miR-219a-1-3p				0.255656		1	0.255656	0
hsa-miR-219a-2-3p				0.256787		1	0.256787	0
hsa-miR-222-5p				0.261312		1	0.261312	0
hsa-miR-223-5p				0.262443		1	0.262443	0
hsa-miR-2277-3p				0.263575		1	0.263575	0
hsa-miR-2278				0.264706		1	0.264706	0
hsa-miR-24-2-5p				0.265837		1	0.265837	0
hsa-miR-25-5p				0.266968		1	0.266968	0
hsa-miR-26a-1-3p				0.2681		1	0.2681	0
hsa-miR-26a-2-3p				0.269231		1	0.269231	0
hsa-miR-26b-3p				0.270362		1	0.270362	0
hsa-miR-27a-5p				0.271493		1	0.271493	0
hsa-miR-27b-5p				0.272624		1	0.272624	0
hsa-miR-28-3p				0.273756		1	0.273756	0
hsa-miR-296-3p				0.274887		1	0.274887	1
hsa-miR-299-3p				0.276018		1	0.276018	0
hsa-miR-29b-2-5p				0.277149		1	0.277149	0
hsa-miR-300				0.278281		1	0.278281	0
hsa-miR-301b-3p				0.279412		1	0.279412	0
hsa-miR-302a-3p				0.280543		1	0.280543	0
hsa-miR-302a-5p				0.281674		1	0.281674	0
hsa-miR-302b-3p				0.282805		1	0.282805	0
hsa-miR-302b-5p				0.283937		1	0.283937	0
hsa-miR-302c-3p				0.285068		1	0.285068	0
hsa-miR-302d-3p				0.28733		1	0.28733	0
hsa-miR-302d-5p				0.288462		1	0.288462	0
hsa-miR-302f				0.290724		1	0.290724	0
hsa-miR-32-3p				0.291855		1	0.291855	1
hsa-miR-323a-3p				0.292986		1	0.292986	0
hsa-miR-323a-5p				0.294118		1	0.294118	0
hsa-miR-323b-5p				0.295249		1	0.295249	0
hsa-miR-325				0.29638		1	0.29638	0
hsa-miR-326				0.297511		1	0.297511	0
hsa-miR-329-3p				0.298643		1	0.298643	0
hsa-miR-330-3p				0.299774		1	0.299774	0
hsa-miR-330-5p				0.300905		1	0.300905	0
hsa-miR-331-5p				0.302036		1	0.302036	0
hsa-miR-335-3p				0.303167		1	0.303167	1
hsa-miR-337-3p				0.304299		1	0.304299	0
hsa-miR-338-5p				0.30543		1	0.30543	0
hsa-miR-33a-3p				0.306561		1	0.306561	0
hsa-miR-33b-5p				0.307692		1	0.307692	0
hsa-miR-34b-5p				0.309955		1	0.309955	1
hsa-miR-34c-3p				0.311086		1	0.311086	0
hsa-miR-363-5p				0.312217		1	0.312217	0
hsa-miR-367-3p				0.313348		1	0.313348	0
hsa-miR-367-5p				0.31448		1	0.31448	0
hsa-miR-369-3p				0.315611		1	0.315611	0
hsa-miR-369-5p				0.316742		1	0.316742	0
hsa-miR-371a-3p				0.317873		1	0.317873	0
hsa-miR-372-3p				0.319005		1	0.319005	0
hsa-miR-373-3p				0.320136		1	0.320136	0
hsa-miR-373-5p				0.321267		1	0.321267	1
hsa-miR-374a-3p				0.322398		1	0.322398	0
hsa-miR-374b-3p				0.323529		1	0.323529	0
hsa-miR-376a-5p				0.324661		1	0.324661	0
hsa-miR-376b-3p				0.325792		1	0.325792	0
hsa-miR-377-5p				0.326923		1	0.326923	0
hsa-miR-379-3p				0.328054		1	0.328054	0
hsa-miR-380-3p				0.329186		1	0.329186	0
hsa-miR-380-5p				0.330317		1	0.330317	0
hsa-miR-383-5p				0.331448		1	0.331448	0
hsa-miR-384				0.332579		1	0.332579	0
hsa-miR-411-5p				0.33371		1	0.33371	0
hsa-miR-411-3p				0.334842		1	0.334842	0
hsa-miR-412-3p				0.335973		1	0.335973	0
hsa-miR-421				0.337104		1	0.337104	1
hsa-miR-431-3p				0.339367		1	0.339367	0
hsa-miR-432-3p				0.340498		1	0.340498	0
hsa-miR-433-3p				0.341629		1	0.341629	0
hsa-miR-448				0.34276		1	0.34276	0
hsa-miR-449b-5p				0.343891		1	0.343891	0
hsa-miR-449b-3p				0.345023		1	0.345023	0
hsa-miR-449c-5p				0.346154		1	0.346154	0
hsa-miR-449c-3p				0.347285		1	0.347285	0
hsa-miR-450b-3p				0.348416		1	0.348416	0
hsa-miR-450b-5p				0.349548		1	0.349548	0
hsa-miR-452-3p				0.350679		1	0.350679	0
hsa-miR-454-5p				0.35181		1	0.35181	0
hsa-miR-485-3p				0.352941		1	0.352941	1
hsa-miR-485-5p				0.354072		1	0.354072	0
hsa-miR-487a-3p				0.356335		1	0.356335	0
hsa-miR-488-5p				0.358597		1	0.358597	0
hsa-miR-490-3p				0.359729		1	0.359729	1
hsa-miR-490-5p				0.36086		1	0.36086	0
hsa-miR-491-3p				0.361991		1	0.361991	0
hsa-miR-491-5p				0.363122		1	0.363122	0
hsa-miR-492				0.364253		1	0.364253	0
hsa-miR-493-5p				0.365385		1	0.365385	0
hsa-miR-496				0.366516		1	0.366516	0
hsa-miR-497-3p				0.367647		1	0.367647	0
hsa-miR-499a-3p				0.368778		1	0.368778	0
hsa-miR-499a-5p				0.36991		1	0.36991	0
hsa-miR-504-5p				0.371041		1	0.371041	0
hsa-miR-511-5p				0.372172		1	0.372172	0
hsa-miR-512-5p				0.373303		1	0.373303	0
hsa-miR-513a-3p				0.374434		1	0.374434	0
hsa-miR-515-3p				0.375566		1	0.375566	0
hsa-miR-515-5p				0.376697		1	0.376697	0
hsa-miR-516a-3p				0.377828		1	0.377828	0
hsa-miR-516b-5p				0.378959		1	0.378959	0
hsa-miR-517-5p				0.38009		1	0.38009	0
hsa-miR-517a-3p				0.381222		1	0.381222	0
hsa-miR-517b-3p				0.382353		1	0.382353	0
hsa-miR-517c-3p				0.383484		1	0.383484	0
hsa-miR-518a-3p				0.384615		1	0.384615	0
hsa-miR-518a-5p				0.385747		1	0.385747	0
hsa-miR-518b				0.386878		1	0.386878	0
hsa-miR-518c-3p				0.388009		1	0.388009	0
hsa-miR-518c-5p				0.38914		1	0.38914	0
hsa-miR-518d-3p				0.390271		1	0.390271	0
hsa-miR-518e-3p				0.391403		1	0.391403	0
hsa-miR-518e-5p				0.392534		1	0.392534	1
hsa-miR-518f-3p				0.393665		1	0.393665	0
hsa-miR-518f-5p				0.394796		1	0.394796	0
hsa-miR-519b-3p				0.395928		1	0.395928	0
hsa-miR-519c-3p				0.397059		1	0.397059	0
hsa-miR-519d-3p				0.39819		1	0.39819	0
hsa-miR-519e-5p				0.400452		1	0.400452	1
hsa-miR-520a-3p				0.401584		1	0.401584	0
hsa-miR-520a-5p				0.402715		1	0.402715	0
hsa-miR-520c-3p				0.403846		1	0.403846	0
hsa-miR-520d-3p				0.404977		1	0.404977	0
hsa-miR-520f-3p				0.406109		1	0.406109	0
hsa-miR-520g-3p				0.40724		1	0.40724	1
hsa-miR-520h				0.408371		1	0.408371	0
hsa-miR-521				0.409502		1	0.409502	0
hsa-miR-522-3p				0.410633		1	0.410633	0
hsa-miR-523-3p				0.411765		1	0.411765	0
hsa-miR-524-3p				0.412896		1	0.412896	0
hsa-miR-525-3p				0.414027		1	0.414027	0
hsa-miR-525-5p				0.415158		1	0.415158	0
hsa-miR-526b-5p				0.41629		1	0.41629	0
hsa-miR-526b-3p				0.417421		1	0.417421	0
hsa-miR-539-5p				0.418552		1	0.418552	0
hsa-miR-541-5p				0.419683		1	0.419683	0
hsa-miR-543				0.420814		1	0.420814	0
hsa-miR-544a				0.421946		1	0.421946	0
hsa-miR-545-3p				0.423077		1	0.423077	0
hsa-miR-548a-3p				0.424208		1	0.424208	1
hsa-miR-548a-5p				0.425339		1	0.425339	0
hsa-miR-548b-3p				0.426471		1	0.426471	0
hsa-miR-548b-5p				0.427602		1	0.427602	0
hsa-miR-548c-3p				0.428733		1	0.428733	1
hsa-miR-548d-3p				0.429864		1	0.429864	1
hsa-miR-548e-3p				0.430995		1	0.430995	0
hsa-miR-548f-3p				0.432127		1	0.432127	1
hsa-miR-548g-3p				0.433258		1	0.433258	1
hsa-miR-548h-5p				0.434389		1	0.434389	1
hsa-miR-548i				0.43552		1	0.43552	0
hsa-miR-548j-5p				0.436652		1	0.436652	0
hsa-miR-548k				0.437783		1	0.437783	1
hsa-miR-548l				0.438914		1	0.438914	0
hsa-miR-548m				0.440045		1	0.440045	0
hsa-miR-548n				0.441176		1	0.441176	0
hsa-miR-548o-3p				0.442308		1	0.442308	1
hsa-miR-548p				0.443439		1	0.443439	0
hsa-miR-549a-3p				0.44457		1	0.44457	0
hsa-miR-550a-3p				0.445701		1	0.445701	0
hsa-miR-551a				0.446833		1	0.446833	0
hsa-miR-551b-5p				0.447964		1	0.447964	0
hsa-miR-552-3p				0.449095		1	0.449095	0
hsa-miR-553				0.450226		1	0.450226	0
hsa-miR-554				0.451357		1	0.451357	0
hsa-miR-555				0.452489		1	0.452489	0
hsa-miR-556-3p				0.45362		1	0.45362	0
hsa-miR-556-5p				0.454751		1	0.454751	0
hsa-miR-558				0.455882		1	0.455882	0
hsa-miR-559				0.457014		1	0.457014	0
hsa-miR-561-3p				0.458145		1	0.458145	0
hsa-miR-562				0.459276		1	0.459276	0
hsa-miR-567				0.461538		1	0.461538	0
hsa-miR-568				0.46267		1	0.46267	0
hsa-miR-569				0.463801		1	0.463801	0
hsa-miR-570-3p				0.464932		1	0.464932	1
hsa-miR-571				0.466063		1	0.466063	0
hsa-miR-573				0.467195		1	0.467195	0
hsa-miR-576-3p				0.468326		1	0.468326	0
hsa-miR-576-5p				0.469457		1	0.469457	0
hsa-miR-577				0.470588		1	0.470588	0
hsa-miR-578				0.471719		1	0.471719	0
hsa-miR-579-3p				0.472851		1	0.472851	0
hsa-miR-580-3p				0.473982		1	0.473982	0
hsa-miR-581				0.475113		1	0.475113	0
hsa-miR-582-3p				0.476244		1	0.476244	0
hsa-miR-583				0.477376		1	0.477376	0
hsa-miR-586				0.478507		1	0.478507	0
hsa-miR-587				0.479638		1	0.479638	0
hsa-miR-588				0.480769		1	0.480769	0
hsa-miR-589-3p				0.483032		1	0.483032	0
hsa-miR-590-3p				0.484163		1	0.484163	0
hsa-miR-591				0.485294		1	0.485294	0
hsa-miR-592				0.486425		1	0.486425	0
hsa-miR-593-5p				0.488688		1	0.488688	0
hsa-miR-595				0.489819		1	0.489819	0
hsa-miR-596				0.49095		1	0.49095	0
hsa-miR-597-5p				0.492081		1	0.492081	0
hsa-miR-599				0.493213		1	0.493213	0
hsa-miR-600				0.494344		1	0.494344	0
hsa-miR-603				0.495475		1	0.495475	0
hsa-miR-604				0.496606		1	0.496606	1
hsa-miR-605-5p				0.497738		1	0.497738	0
hsa-miR-606				0.498869		1	0.498869	0
hsa-miR-608				0.5		1	0.5	0
hsa-miR-609				0.501131		1	0.501131	0
hsa-miR-611				0.502262		1	0.502262	0
hsa-miR-612				0.503394		1	0.503394	1
hsa-miR-613				0.504525		1	0.504525	0
hsa-miR-615-5p				0.505656		1	0.505656	0
hsa-miR-616-3p				0.506787		1	0.506787	0
hsa-miR-616-5p				0.507919		1	0.507919	0
hsa-miR-617				0.50905		1	0.50905	0
hsa-miR-619-3p				0.510181		1	0.510181	0
hsa-miR-620				0.511312		1	0.511312	0
hsa-miR-621				0.512443		1	0.512443	0
hsa-miR-624-5p				0.513575		1	0.513575	0
hsa-miR-626				0.514706		1	0.514706	0
hsa-miR-627-5p				0.515837		1	0.515837	0
hsa-miR-628-3p				0.516968		1	0.516968	0
hsa-miR-629-5p				0.5181		1	0.5181	0
hsa-miR-629-3p				0.519231		1	0.519231	1
hsa-miR-631				0.520362		1	0.520362	0
hsa-miR-632				0.521493		1	0.521493	0
hsa-miR-633				0.522624		1	0.522624	0
hsa-miR-635				0.523756		1	0.523756	0
hsa-miR-637				0.524887		1	0.524887	0
hsa-miR-639				0.526018		1	0.526018	0
hsa-miR-640				0.527149		1	0.527149	0
hsa-miR-641				0.528281		1	0.528281	0
hsa-miR-642a-5p				0.529412		1	0.529412	0
hsa-miR-644a				0.530543		1	0.530543	1
hsa-miR-645				0.531674		1	0.531674	0
hsa-miR-646				0.532805		1	0.532805	0
hsa-miR-648				0.535068		1	0.535068	0
hsa-miR-649				0.536199		1	0.536199	0
hsa-miR-650				0.53733		1	0.53733	0
hsa-miR-651-5p				0.538462		1	0.538462	0
hsa-miR-653-5p				0.539593		1	0.539593	0
hsa-miR-655-3p				0.540724		1	0.540724	0
hsa-miR-656-3p				0.541855		1	0.541855	0
hsa-miR-657				0.542986		1	0.542986	0
hsa-miR-658				0.544118		1	0.544118	0
hsa-miR-659-3p				0.545249		1	0.545249	1
hsa-miR-661				0.54638		1	0.54638	0
hsa-miR-668-3p				0.547511		1	0.547511	0
hsa-miR-670-5p				0.548643		1	0.548643	0
hsa-miR-675-5p				0.549774		1	0.549774	0
hsa-miR-675-3p				0.550905		1	0.550905	0
hsa-miR-7-2-3p				0.552036		1	0.552036	0
hsa-miR-708-5p				0.553167		1	0.553167	0
hsa-miR-708-3p				0.554299		1	0.554299	0
hsa-miR-711				0.55543		1	0.55543	0
hsa-miR-744-3p				0.556561		1	0.556561	0
hsa-miR-758-3p				0.557692		1	0.557692	0
hsa-miR-759				0.558824		1	0.558824	0
hsa-miR-761				0.559955		1	0.559955	0
hsa-miR-764				0.561086		1	0.561086	0
hsa-miR-767-3p				0.562217		1	0.562217	0
hsa-miR-770-5p				0.56448		1	0.56448	0
hsa-miR-802				0.565611		1	0.565611	0
hsa-miR-873-5p				0.566742		1	0.566742	0
hsa-miR-875-3p				0.567873		1	0.567873	0
hsa-miR-875-5p				0.569005		1	0.569005	0
hsa-miR-885-3p				0.570136		1	0.570136	0
hsa-miR-887-3p				0.572398		1	0.572398	0
hsa-miR-888-5p				0.573529		1	0.573529	0
hsa-miR-888-3p				0.574661		1	0.574661	0
hsa-miR-889-3p				0.575792		1	0.575792	0
hsa-miR-890				0.576923		1	0.576923	1
hsa-miR-891b				0.579186		1	0.579186	0
hsa-miR-892a				0.580317		1	0.580317	0
hsa-miR-920				0.581448		1	0.581448	0
hsa-miR-921				0.582579		1	0.582579	0
hsa-miR-922				0.58371		1	0.58371	0
hsa-miR-924				0.584842		1	0.584842	0
hsa-miR-92a-1-5p				0.585973		1	0.585973	0
hsa-miR-92a-2-5p				0.587104		1	0.587104	0
hsa-miR-92b-5p				0.588235		1	0.588235	0
hsa-miR-93-3p				0.589367		1	0.589367	0
hsa-miR-934				0.590498		1	0.590498	0
hsa-miR-935				0.591629		1	0.591629	0
hsa-miR-938				0.595023		1	0.595023	1
hsa-miR-941				0.596154		1	0.596154	0
hsa-miR-942-5p				0.597285		1	0.597285	0
hsa-miR-944				0.599548		1	0.599548	0
hsa-miR-96-3p				0.600679		1	0.600679	0
hsa-miR-99a-3p				0.60181		1	0.60181	0
hsa-miR-513a-5p				0.602941		1	0.602941	0
hsa-miR-1225-5p				0.604072		1	0.604072	0
hsa-let-7d				0.607466		1	0.607466	0
hsa-miR-1202				0.608597		1	0.608597	0
hsa-miR-30b-5p				0.609729		1	0.609729	0
hsa-miR-195-3p				0.614253		1	0.614253	0
hsa-miR-548d-5p				0.616516		1	0.616516	1
hsa-miR-1207-5p				0.618778		1	0.618778	0
hsa-miR-22-3p				0.621041		1	0.621041	0
hsa-miR-513b-5p				0.623303		1	0.623303	0
hsa-miR-33b-3p				0.624434		1	0.624434	0
hsa-miR-877-5p				0.625566		1	0.625566	0
hsa-miR-1973				0.626697		1	0.626697	0
hsa-miR-145-5p				0.627828		1	0.627828	0
hsa-miR-9-3p				0.628959		1	0.628959	0
hsa-miR-762				0.63009		1	0.63009	0
hsa-miR-154-3p				0.632353		1	0.632353	0
hsa-miR-129-2-3p				0.633484		1	0.633484	0
hsa-let-7b-3p				0.635747		1	0.635747	0
hsa-miR-27b-3p				0.636878		1	0.636878	0
hsa-miR-149-3p				0.638009		1	0.638009	1
hsa-let-7f-1-3p				0.63914		1	0.63914	0
hsa-miR-1226-3p				0.640271		1	0.640271	0
hsa-miR-141-5p				0.641403		1	0.641403	0
hsa-miR-671-3p				0.642534		1	0.642534	0
hsa-miR-143-5p				0.643665		1	0.643665	0
hsa-miR-34c-5p				0.644796		1	0.644796	0
hsa-let-7c				0.645928		1	0.645928	0
hsa-miR-382-5p				0.647059		1	0.647059	0
hsa-miR-379-5p				0.649321		1	0.649321	0
hsa-miR-200b-3p				0.650452		1	0.650452	0
hsa-miR-1246				0.652715		1	0.652715	1
hsa-miR-10b-5p				0.653846		1	0.653846	0
hsa-miR-18b-3p				0.654977		1	0.654977	1
hsa-miR-190b-5p				0.656109		1	0.656109	0
hsa-miR-876-5p				0.65724		1	0.65724	0
hsa-miR-100-3p				0.658371		1	0.658371	0
hsa-miR-643				0.659502		1	0.659502	0

## Sheet: DN_urine
Table S2. Up- and down-regulated urinary miRNAs were reported in diabetic nephropathy
Down-regulated miRNAs										Up-regulated miRNAs
miRNA	D. Delić , 2016 (DN)	M. Cardenas-Gonzalez, 2017 (DN)	Z. Gao, 2020 (DN)	C.Beltrami, 2018 (DN)	T. Konta, 2014 (DN)	B. Zapała, 2023 (DN)	Studies with the same direction	Average ranking score	Studies with opposite direction	miRNA	Z. Gao, 2020 (DN)	T. Konta, 2014 (DN)	C.Beltrami, 2018 (DN)	D. Delić , 2016 (DN)	M. Cardenas-Gonzalez, 2017 (DN)	B. Zapała, 2023 (DN)	Studies with the same direction	Average ranking score	Studies with opposite direction
hsa-miR-514b-5p			0.00392311		0.00477327		2	0.00434819	1	hsa-miR-92b-3p	0.00196155	0.0556881				0.0228471	3	0.0268323	0
hsa-miR-204-5p				0.0278515		0.0123023	2	0.0200769	0	hsa-miR-126-3p			0.00530504			0.00351494	2	0.00440999	0
hsa-miR-10a-5p		0.0109589		0.0397878			2	0.0253734	0	hsa-miR-4286	0.0102001	0.00238663					2	0.00629336	0
hsa-miR-106a-5p				0.0371353		0.0140598	2	0.0255975	0	hsa-miR-30a-5p		0.00318218			0.0136986		2	0.0084404	0
hsa-miR-361-5p			0.00666928	0.0450928			2	0.0258811	0	hsa-miR-27a-3p	0.00549235		0.0119363				2	0.00871434	0
hsa-miR-221-3p				0.0755968		0.0105448	2	0.0430708	0	hsa-miR-29b-3p	0.0156924		0.00265252				2	0.00917247	0
hsa-miR-200b-3p				0.0702918		0.0193322	2	0.044812	0	hsa-miR-30d-5p		0.0230708			0.0109589		2	0.0170149	1
hsa-miR-30e-5p	0.000392311						1	0.000392311	1	hsa-miR-365a-3p	0.000784621	0.0485282					2	0.0246564	1
hsa-miR-3141			0.000392311				1	0.000392311	1	hsa-miR-1234-3p		0.0540971		0.00117693			2	0.027637	0
hsa-miR-3124-5p			0.000784621				1	0.000784621	0	hsa-miR-320c		0.0684169		0.000392311			2	0.0344046	1
hsa-miR-30d-5p	0.000784621						1	0.000784621	2	hsa-miR-129-2-3p	0.051785	0.0318218					2	0.0418034	0
hsa-miR-134-5p					0.000795545		1	0.000795545	0	hsa-miR-638		0.0819411		0.00196155			2	0.0419513	0
hsa-miR-7845-5p			0.00117693				1	0.00117693	0	hsa-miR-1-5p	0.000392311						1	0.000392311	0
hsa-miR-29c-3p				0.00132626			1	0.00132626	1	hsa-miR-6068				0.000784621			1	0.000784621	0
hsa-miR-584-5p			0.00156924				1	0.00156924	0	hsa-miR-3127-5p		0.000795545					1	0.000795545	0
hsa-miR-3202					0.00159109		1	0.00159109	0	hsa-miR-7975	0.00117693						1	0.00117693	0
hsa-miR-582-5p						0.00175747	1	0.00175747	0	hsa-miR-212-3p			0.00132626				1	0.00132626	0
hsa-miR-7106-5p			0.00196155				1	0.00196155	0	hsa-miR-154-3p	0.00156924						1	0.00156924	0
hsa-miR-4785			0.00235386				1	0.00235386	0	hsa-miR-6133				0.00156924			1	0.00156924	0
hsa-miR-3911					0.00238663		1	0.00238663	0	hsa-miR-3189-3p		0.00159109					1	0.00159109	0
hsa-let-7d				0.00265252			1	0.00265252	0	hsa-miR-451a						0.00175747	1	0.00175747	0
hsa-miR-1915-3p		0.00273973					1	0.00273973	1	hsa-miR-7157-5p	0.00235386						1	0.00235386	0
hsa-miR-5585-3p			0.00274617				1	0.00274617	0	hsa-miR-572				0.00235386			1	0.00235386	0
hsa-miR-663a					0.00318218		1	0.00318218	0	hsa-miR-6839-5p					0.00273973		1	0.00273973	0
hsa-miR-205-5p						0.00351494	1	0.00351494	0	hsa-miR-4764-5p	0.00274617						1	0.00274617	0
hsa-miR-6765-3p			0.0035308				1	0.0035308	0	hsa-miR-6832-5p	0.00313849						1	0.00313849	0
hsa-miR-936					0.00397772		1	0.00397772	0	hsa-miR-5100	0.0035308						1	0.0035308	0
hsa-miR-10b-5p				0.00397878			1	0.00397878	0	hsa-miR-376b-5p	0.00392311						1	0.00392311	0
hsa-miR-6790-5p			0.00431542				1	0.00431542	0	hsa-miR-1287-5p		0.00397772					1	0.00397772	0
hsa-miR-760			0.00470773				1	0.00470773	0	hsa-miR-218-5p			0.00397878				1	0.00397878	0
hsa-miR-7156-3p			0.00510004				1	0.00510004	0	hsa-miR-4752	0.00431542						1	0.00431542	0
hsa-miR-182-5p						0.00527241	1	0.00527241	0	hsa-miR-3151-3p	0.00470773						1	0.00470773	0
hsa-miR-26a-5p				0.00530504			1	0.00530504	0	hsa-miR-574-3p		0.00477327					1	0.00477327	1
hsa-miR-2861		0.00547945					1	0.00547945	1	hsa-miR-216a-3p	0.00510004						1	0.00510004	0
hsa-miR-550a-5p			0.00549235				1	0.00549235	1	hsa-miR-503						0.00527241	1	0.00527241	0
hsa-miR-296-5p					0.00556881		1	0.00556881	0	hsa-miR-30e-5p					0.00547945		1	0.00547945	1
hsa-miR-5699-5p			0.00588466				1	0.00588466	0	hsa-miR-595		0.00556881					1	0.00556881	0
hsa-miR-4728-5p			0.00627697				1	0.00627697	0	hsa-miR-181c-3p	0.00588466						1	0.00588466	0
hsa-miR-548q					0.00636436		1	0.00636436	0	hsa-miR-4524a-5p	0.00627697						1	0.00627697	0
hsa-miR-365a-3p				0.0066313			1	0.0066313	2	hsa-miR-155-5p			0.0066313				1	0.0066313	0
hsa-miR-200c-3p						0.00702988	1	0.00702988	1	hsa-miR-302a-5p	0.00666928						1	0.00666928	0
hsa-miR-1972			0.00706159				1	0.00706159	0	hsa-miR-455-3p						0.00702988	1	0.00702988	0
hsa-miR-3610					0.0071599		1	0.0071599	0	hsa-miR-4774-5p	0.00706159						1	0.00706159	0
hsa-miR-631			0.0074539				1	0.0074539	1	hsa-miR-4253		0.0071599					1	0.0071599	0
hsa-miR-1307-5p			0.00784621				1	0.00784621	0	hsa-miR-1197	0.0074539						1	0.0074539	0
hsa-miR-125a-3p					0.00795545		1	0.00795545	0	hsa-miR-6128	0.00784621						1	0.00784621	0
hsa-let-7e				0.00795756			1	0.00795756	0	hsa-miR-21-5p		0.00795545					1	0.00795545	0
hsa-miR-4644			0.00823852				1	0.00823852	0	hsa-miR-145-5p			0.00795756				1	0.00795756	0
hsa-miR-4274					0.00875099		1	0.00875099	0	hsa-miR-4536-3p					0.00821918		1	0.00821918	0
hsa-miR-375						0.00878735	1	0.00878735	0	hsa-miR-4712-3p	0.00823852						1	0.00823852	0
hsa-miR-1181			0.00902315				1	0.00902315	0	hsa-miR-4716-5p	0.00863084						1	0.00863084	0
hsa-miR-520e-3p				0.00928382			1	0.00928382	0	hsa-miR-583		0.00875099					1	0.00875099	0
hsa-miR-619-5p			0.00941546				1	0.00941546	0	hsa-miR-301a-3p						0.00878735	1	0.00878735	1
hsa-miR-3180-3p					0.00954654		1	0.00954654	0	hsa-miR-1323	0.00902315						1	0.00902315	0
hsa-miR-4681			0.00980777				1	0.00980777	0	hsa-miR-627-5p			0.00928382				1	0.00928382	0
hsa-miR-4538			0.0102001				1	0.0102001	0	hsa-miR-6891-3p	0.00941546						1	0.00941546	0
hsa-miR-498-5p					0.0103421		1	0.0103421	0	hsa-miR-1246		0.00954654					1	0.00954654	0
hsa-miR-4804-5p			0.0105924				1	0.0105924	0	hsa-miR-96-5p	0.00980777						1	0.00980777	0
hsa-miR-194-5p				0.0106101			1	0.0106101	1	hsa-miR-3155a		0.0103421					1	0.0103421	0
hsa-miR-4707-5p			0.0109847				1	0.0109847	0	hsa-miR-542-5p						0.0105448	1	0.0105448	0
hsa-miR-371a-5p					0.0111376		1	0.0111376	0	hsa-miR-125b-1-3p	0.0105924						1	0.0105924	0
hsa-miR-4257			0.011377				1	0.011377	1	hsa-miR-411-5p			0.0106101				1	0.0106101	0
hsa-miR-5684			0.0117693				1	0.0117693	0	hsa-miR-1264	0.0109847						1	0.0109847	0
hsa-miR-3131					0.0119332		1	0.0119332	0	hsa-miR-631		0.0111376					1	0.0111376	1
hsa-miR-146b-5p				0.0119363			1	0.0119363	0	hsa-miR-4639-5p	0.011377						1	0.011377	0
hsa-miR-320c			0.0121616				1	0.0121616	2	hsa-miR-4667-3p	0.0117693						1	0.0117693	0
hsa-miR-6859-5p			0.0125539				1	0.0125539	0	hsa-miR-1260a		0.0119332					1	0.0119332	0
hsa-miR-1226-3p					0.0127287		1	0.0127287	0	hsa-miR-4639-3p	0.0121616						1	0.0121616	0
hsa-miR-4786-5p			0.0129463				1	0.0129463	0	hsa-miR-32-5p						0.0123023	1	0.0123023	0
hsa-miR-26b-5p				0.0132626			1	0.0132626	0	hsa-miR-34c-5p	0.0125539						1	0.0125539	0
hsa-miR-6771-3p			0.0133386				1	0.0133386	0	hsa-miR-324-3p		0.0127287					1	0.0127287	1
hsa-miR-659-3p					0.0135243		1	0.0135243	0	hsa-miR-9-5p	0.0129463						1	0.0129463	0
hsa-miR-6765-5p		0.0136986					1	0.0136986	0	hsa-miR-376a-3p			0.0132626				1	0.0132626	0
hsa-miR-3199			0.0137309				1	0.0137309	0	hsa-miR-4295	0.0133386						1	0.0133386	0
hsa-miR-6776-5p			0.0141232				1	0.0141232	0	hsa-miR-22-3p		0.0135243					1	0.0135243	0
hsa-miR-3667-5p					0.0143198		1	0.0143198	0	hsa-miR-4697-3p	0.0137309						1	0.0137309	0
hsa-miR-4449			0.0145155				1	0.0145155	0	hsa-miR-214-3p						0.0140598	1	0.0140598	0
hsa-miR-135b-5p				0.0145889			1	0.0145889	0	hsa-miR-98-3p	0.0141232						1	0.0141232	0
hsa-miR-6815-3p			0.0149078				1	0.0149078	0	hsa-miR-141-3p		0.0143198					1	0.0143198	0
hsa-miR-3917					0.0151154		1	0.0151154	0	hsa-miR-224-3p	0.0145155						1	0.0145155	0
hsa-miR-6849-3p			0.0153001				1	0.0153001	0	hsa-miR-331-5p			0.0145889				1	0.0145889	0
hsa-miR-6739-5p			0.0156924				1	0.0156924	0	hsa-miR-7977	0.0149078						1	0.0149078	0
hsa-miR-500a-5p						0.0158172	1	0.0158172	0	hsa-miR-1260b		0.0151154					1	0.0151154	0
hsa-miR-3180-5p					0.0159109		1	0.0159109	0	hsa-miR-3658	0.0153001						1	0.0153001	0
hsa-miR-331-3p				0.0159151			1	0.0159151	0	hsa-miR-148b-5p						0.0158172	1	0.0158172	0
hsa-miR-3622b-5p			0.0160847				1	0.0160847	0	hsa-miR-30c-2-3p		0.0159109					1	0.0159109	0
hsa-miR-5191			0.016477				1	0.016477	0	hsa-miR-485-3p			0.0159151				1	0.0159151	0
hsa-miR-3675-3p					0.0167064		1	0.0167064	0	hsa-miR-6759-3p	0.0160847						1	0.0160847	0
hsa-miR-5189-5p			0.0168694				1	0.0168694	0	hsa-miR-6747-3p					0.0164384		1	0.0164384	0
hsa-let-7g				0.0172414			1	0.0172414	0	hsa-miR-520f-3p	0.016477						1	0.016477	0
hsa-miR-208a-5p			0.0172617				1	0.0172617	0	hsa-miR-877-5p		0.0167064					1	0.0167064	1
hsa-miR-198					0.017502		1	0.017502	0	hsa-miR-3148	0.0168694						1	0.0168694	0
hsa-miR-339-5p						0.0175747	1	0.0175747	0	hsa-miR-373-3p			0.0172414				1	0.0172414	0
hsa-miR-6878-5p			0.017654				1	0.017654	0	hsa-miR-1286	0.0172617						1	0.0172617	0
hsa-miR-6823-5p			0.0180463				1	0.0180463	0	hsa-miR-194-5p		0.017502					1	0.017502	1
hsa-miR-877-5p					0.0182975		1	0.0182975	1	hsa-miR-514a-5p						0.0175747	1	0.0175747	0
hsa-miR-660-5p			0.0184386				1	0.0184386	0	hsa-miR-548l	0.017654						1	0.017654	0
hsa-miR-374a-5p				0.0185676			1	0.0185676	1	hsa-miR-518a-3p	0.0180463						1	0.0180463	0
hsa-miR-6510-5p			0.0188309				1	0.0188309	0	hsa-miR-200c-3p		0.0182975					1	0.0182975	1
hsa-miR-18b-5p					0.0190931		1	0.0190931	0	hsa-miR-585-3p	0.0184386						1	0.0184386	0
hsa-miR-4518			0.0192232				1	0.0192232	0	hsa-miR-202-3p			0.0185676				1	0.0185676	0
hsa-miR-197-5p			0.0196155				1	0.0196155	0	hsa-miR-3158-3p	0.0188309						1	0.0188309	0
hsa-miR-4306					0.0198886		1	0.0198886	0	hsa-miR-665		0.0190931					1	0.0190931	0
hsa-miR-135a-5p				0.0198939			1	0.0198939	1	hsa-miR-4301					0.0191781		1	0.0191781	0
hsa-miR-4646-5p			0.0200078				1	0.0200078	0	hsa-miR-548av-3p	0.0192232						1	0.0192232	0
hsa-miR-5703			0.0204002				1	0.0204002	0	hsa-miR-548z						0.0193322	1	0.0193322	0
hsa-miR-6076			0.0207925				1	0.0207925	0	hsa-miR-329-3p	0.0196155						1	0.0196155	0
hsa-miR-500b						0.0210896	1	0.0210896	0	hsa-miR-601		0.0198886					1	0.0198886	0
hsa-miR-378f			0.0211848				1	0.0211848	1	hsa-miR-489-3p			0.0198939				1	0.0198939	0
hsa-miR-99a-5p				0.0212202			1	0.0212202	0	hsa-miR-5000-5p	0.0200078						1	0.0200078	0
hsa-miR-630			0.0215771				1	0.0215771	1	hsa-miR-6873-3p	0.0204002						1	0.0204002	0
hsa-miR-3649			0.0223617				1	0.0223617	0	hsa-miR-483-5p		0.0206842					1	0.0206842	1
hsa-miR-362-5p				0.0225464			1	0.0225464	0	hsa-miR-922	0.0207925						1	0.0207925	0
hsa-miR-6829-5p			0.022754				1	0.022754	0	hsa-miR-548h-3p						0.0210896	1	0.0210896	0
hsa-miR-363-3p						0.0228471	1	0.0228471	0	hsa-miR-6831-3p	0.0211848						1	0.0211848	0
hsa-miR-3925-5p			0.0231463				1	0.0231463	0	hsa-miR-652-3p			0.0212202				1	0.0212202	0
hsa-miR-5195-5p			0.0235386				1	0.0235386	0	hsa-miR-3162-5p		0.0214797					1	0.0214797	0
hsa-miR-17-5p				0.0238727			1	0.0238727	0	hsa-miR-6833-3p	0.0215771						1	0.0215771	0
hsa-miR-4519			0.023931				1	0.023931	0	hsa-miR-30c-5p					0.0219178		1	0.0219178	1
hsa-miR-6879-5p			0.0243233				1	0.0243233	0	hsa-miR-340-3p	0.0219694						1	0.0219694	0
hsa-miR-431-5p			0.0247156				1	0.0247156	0	hsa-miR-197-3p		0.0222753					1	0.0222753	0
hsa-miR-1236-5p			0.0251079				1	0.0251079	0	hsa-miR-141-5p	0.0223617						1	0.0223617	0
hsa-miR-301a-3p				0.0251989			1	0.0251989	1	hsa-miR-628-5p			0.0225464				1	0.0225464	0
hsa-miR-8085			0.0255002				1	0.0255002	0	hsa-miR-4766-5p	0.022754						1	0.022754	0
hsa-miR-4465			0.0258925				1	0.0258925	0	hsa-miR-5580-5p	0.0231463						1	0.0231463	0
hsa-miR-3126-5p			0.0262848				1	0.0262848	0	hsa-miR-515-5p	0.0235386						1	0.0235386	0
hsa-miR-21-3p						0.026362	1	0.026362	0	hsa-miR-1202		0.0238663					1	0.0238663	0
hsa-miR-192-5p				0.0265252			1	0.0265252	0	hsa-miR-133a-3p			0.0238727				1	0.0238727	0
hsa-miR-5787			0.0266771				1	0.0266771	0	hsa-miR-2276-5p	0.023931						1	0.023931	0
hsa-miR-1910-5p			0.0270694				1	0.0270694	0	hsa-miR-548ay-3p	0.0243233						1	0.0243233	0
hsa-miR-874-3p			0.0274617				1	0.0274617	0	hsa-miR-514b-5p						0.0246046	1	0.0246046	2
hsa-miR-320d			0.0278541				1	0.0278541	0	hsa-miR-1180-3p					0.0246575		1	0.0246575	0
hsa-miR-196a-5p						0.0281195	1	0.0281195	0	hsa-miR-3652		0.0246619					1	0.0246619	0
hsa-miR-6757-5p			0.0282464				1	0.0282464	0	hsa-miR-186-5p	0.0247156						1	0.0247156	0
hsa-miR-4672			0.0286387				1	0.0286387	0	hsa-miR-8083	0.0251079						1	0.0251079	0
hsa-miR-100-5p				0.0291777			1	0.0291777	1	hsa-miR-337-5p			0.0251989				1	0.0251989	0
hsa-miR-4512			0.0294233				1	0.0294233	0	hsa-miR-1825		0.0254574					1	0.0254574	0
hsa-miR-3187-3p			0.0298156				1	0.0298156	0	hsa-miR-5586-5p	0.0255002						1	0.0255002	0
hsa-miR-222-3p						0.029877	1	0.029877	0	hsa-miR-380-3p	0.0258925						1	0.0258925	0
hsa-miR-6894-5p			0.0302079				1	0.0302079	0	hsa-miR-223-3p		0.026253					1	0.026253	0
hsa-miR-30b-5p				0.030504			1	0.030504	0	hsa-miR-1306-5p	0.0262848						1	0.0262848	0
hsa-miR-210-3p			0.0306002				1	0.0306002	0	hsa-miR-1269a						0.026362	1	0.026362	0
hsa-miR-718			0.0309925				1	0.0309925	1	hsa-miR-551b-3p			0.0265252				1	0.0265252	0
hsa-miR-3186-3p			0.0313849				1	0.0313849	0	hsa-miR-6078	0.0266771						1	0.0266771	0
hsa-miR-1268a						0.0316344	1	0.0316344	1	hsa-miR-1281		0.0270485					1	0.0270485	0
hsa-miR-4271			0.0317772				1	0.0317772	1	hsa-miR-494-5p	0.0270694						1	0.0270694	0
hsa-miR-328-3p				0.0318302			1	0.0318302	0	hsa-miR-6842-3p					0.0273973		1	0.0273973	0
hsa-miR-629-3p			0.0321695				1	0.0321695	0	hsa-miR-3170	0.0274617						1	0.0274617	0
hsa-miR-4750-5p			0.0325618				1	0.0325618	0	hsa-miR-376c-3p			0.0278515				1	0.0278515	0
hsa-miR-550b-2-5p			0.0329541				1	0.0329541	0	hsa-miR-4701-5p	0.0278541						1	0.0278541	0
hsa-miR-362-3p				0.0331565			1	0.0331565	0	hsa-miR-124-3p						0.0281195	1	0.0281195	0
hsa-miR-382-5p			0.0333464				1	0.0333464	0	hsa-miR-3167	0.0282464						1	0.0282464	0
hsa-miR-501-5p						0.0333919	1	0.0333919	0	hsa-miR-766-5p	0.0286387						1	0.0286387	0
hsa-miR-28-5p				0.0344828			1	0.0344828	0	hsa-miR-4312		0.0286396					1	0.0286396	0
hsa-miR-19b-1-5p						0.0351494	1	0.0351494	0	hsa-miR-221-5p	0.029031						1	0.029031	0
hsa-miR-30c-5p				0.035809			1	0.035809	1	hsa-miR-29a-3p			0.0291777				1	0.0291777	0
hsa-miR-378a-5p						0.0369069	1	0.0369069	0	hsa-miR-29c-3p	0.0294233						1	0.0294233	1
hsa-miR-20a-5p				0.0384615			1	0.0384615	0	hsa-let-7b		0.0294352					1	0.0294352	0
hsa-miR-545-3p						0.0386643	1	0.0386643	0	hsa-miR-4471	0.0298156						1	0.0298156	0
hsa-miR-618				0.0411141			1	0.0411141	0	hsa-miR-4802-3p						0.029877	1	0.029877	0
hsa-miR-125b-5p				0.0424403			1	0.0424403	0	hsa-miR-100-5p					0.030137		1	0.030137	1
hsa-miR-885-5p				0.0437666			1	0.0437666	1	hsa-miR-4460	0.0302079						1	0.0302079	0
hsa-miR-502-3p				0.0464191			1	0.0464191	0	hsa-miR-1227-3p		0.0302307					1	0.0302307	0
hsa-miR-429				0.0477454			1	0.0477454	0	hsa-miR-140-3p			0.030504				1	0.030504	0
hsa-miR-99b-5p				0.0490716			1	0.0490716	0	hsa-miR-885-5p	0.0306002						1	0.0306002	1
hsa-miR-576-3p				0.0503979			1	0.0503979	0	hsa-miR-1256	0.0309925						1	0.0309925	0
hsa-miR-597-5p				0.0517241			1	0.0517241	0	hsa-miR-149-5p		0.0310263					1	0.0310263	0
hsa-miR-20b-5p				0.0530504			1	0.0530504	0	hsa-miR-5196-3p	0.0313849						1	0.0313849	0
hsa-miR-335-5p				0.0543767			1	0.0543767	0	hsa-miR-450a-5p						0.0316344	1	0.0316344	0
hsa-miR-491-5p				0.0557029			1	0.0557029	0	hsa-miR-5197-5p	0.0317772						1	0.0317772	0
hsa-miR-19b-3p				0.0570292			1	0.0570292	0	hsa-miR-6863	0.0325618						1	0.0325618	0
hsa-miR-574-3p				0.0583554			1	0.0583554	1	hsa-miR-1539		0.0326173					1	0.0326173	0
hsa-miR-181a-5p				0.0596817			1	0.0596817	0	hsa-miR-4643	0.0329541						1	0.0329541	0
hsa-miR-93-5p				0.061008			1	0.061008	0	hsa-miR-3920	0.0333464						1	0.0333464	0
hsa-let-7c				0.0623342			1	0.0623342	0	hsa-miR-1307-3p						0.0333919	1	0.0333919	0
hsa-miR-190a-5p				0.0636605			1	0.0636605	0	hsa-miR-766-3p		0.0334129					1	0.0334129	0
hsa-miR-340-5p				0.0649867			1	0.0649867	0	hsa-miR-4713-5p	0.0337387						1	0.0337387	0
hsa-miR-152-3p				0.066313			1	0.066313	0	hsa-miR-5007-3p	0.034131						1	0.034131	0
hsa-miR-27b-3p				0.0676393			1	0.0676393	0	hsa-miR-933		0.0342084					1	0.0342084	0
hsa-miR-138-5p				0.0689655			1	0.0689655	0	hsa-miR-5197-3p	0.0345233						1	0.0345233	0
hsa-miR-148b-3p				0.071618			1	0.071618	0	hsa-miR-8070	0.0349157						1	0.0349157	0
hsa-miR-193b-3p				0.0729443			1	0.0729443	0	hsa-miR-33b-5p		0.035004					1	0.035004	0
hsa-miR-374b-5p				0.0742706			1	0.0742706	0	hsa-miR-378f						0.0351494	1	0.0351494	1
hsa-miR-518f-3p				0.0769231			1	0.0769231	0	hsa-miR-1245a	0.035308						1	0.035308	0
hsa-miR-483-5p				0.0782493			1	0.0782493	1	hsa-miR-6818-3p	0.0357003						1	0.0357003	0
hsa-miR-888-5p				0.0795756			1	0.0795756	0	hsa-miR-4284		0.0357995					1	0.0357995	0
hsa-miR-324-3p				0.0809019			1	0.0809019	1	hsa-miR-4747-3p	0.0360926						1	0.0360926	0
										hsa-miR-3714	0.0364849						1	0.0364849	0
										hsa-let-7f-1		0.0365951					1	0.0365951	0
										hsa-miR-3160-3p	0.0368772						1	0.0368772	0
										hsa-miR-95						0.0369069	1	0.0369069	0
										hsa-miR-4683	0.0372695						1	0.0372695	0
										hsa-miR-425-5p		0.0373906					1	0.0373906	0
										hsa-miR-383-3p	0.0376618						1	0.0376618	0
										hsa-miR-122-3p	0.0380541						1	0.0380541	0
										hsa-miR-1468-5p	0.0384464						1	0.0384464	0
										hsa-miR-342-5p						0.0386643	1	0.0386643	0
										hsa-miR-599	0.0388388						1	0.0388388	0
										hsa-miR-4310		0.0389817					1	0.0389817	0
										hsa-let-7c-3p	0.0392311						1	0.0392311	0
										hsa-miR-3128	0.0396234						1	0.0396234	0
										hsa-miR-23c		0.0397772					1	0.0397772	0
										hsa-miR-4801	0.0400157						1	0.0400157	0
										hsa-miR-660-3p	0.040408						1	0.040408	0
										hsa-miR-199b-3p						0.0404218	1	0.0404218	0
										hsa-miR-191-5p		0.0405728					1	0.0405728	0
										hsa-miR-4521	0.0408003						1	0.0408003	0
										hsa-miR-7155-5p	0.0411926						1	0.0411926	0
										hsa-miR-550a-5p		0.0413683					1	0.0413683	1
										hsa-miR-7151-5p	0.0415849						1	0.0415849	0
										hsa-miR-3143	0.0419772						1	0.0419772	0
										hsa-miR-563		0.0421639					1	0.0421639	0
										hsa-miR-199a-3p						0.0421793	1	0.0421793	0
										hsa-miR-518c-3p	0.0423696						1	0.0423696	0
										hsa-miR-495-3p	0.0427619						1	0.0427619	0
										hsa-miR-2116-5p		0.0429594					1	0.0429594	0
										hsa-miR-5092	0.0431542						1	0.0431542	0
										hsa-miR-651-5p	0.0435465						1	0.0435465	0
										hsa-miR-4313		0.043755					1	0.043755	0
										hsa-miR-4691-3p	0.0439388						1	0.0439388	0
										hsa-miR-769-5p	0.0443311						1	0.0443311	0
										hsa-miR-1238-3p		0.0445505					1	0.0445505	0
										hsa-miR-326	0.0447234						1	0.0447234	0
										hsa-miR-4664-5p	0.0451157						1	0.0451157	0
										hsa-miR-602		0.0453461					1	0.0453461	0
										hsa-miR-454-3p	0.045508						1	0.045508	0
										hsa-miR-3944-3p	0.0459004						1	0.0459004	0
										hsa-miR-574-5p		0.0461416					1	0.0461416	0
										hsa-miR-541-5p	0.0462927						1	0.0462927	0
										hsa-miR-2115-3p	0.046685						1	0.046685	0
										hsa-miR-4323		0.0469372					1	0.0469372	0
										hsa-miR-139-5p	0.0470773						1	0.0470773	0
										hsa-miR-6852-5p	0.0474696						1	0.0474696	0
										hsa-miR-4257		0.0477327					1	0.0477327	1
										hsa-miR-518b	0.0478619						1	0.0478619	0
										hsa-miR-4279	0.0482542						1	0.0482542	0
										hsa-miR-5586-3p	0.0486465						1	0.0486465	0
										hsa-miR-3922-3p	0.0490388						1	0.0490388	0
										hsa-miR-4271		0.0493238					1	0.0493238	1
										hsa-miR-8080	0.0494311						1	0.0494311	0
										hsa-miR-3919	0.0498235						1	0.0498235	0
										hsa-miR-5590-5p	0.0502158						1	0.0502158	0
										hsa-miR-4676-3p	0.0506081						1	0.0506081	0
										hsa-miR-1225-3p		0.0509149					1	0.0509149	0
										hsa-miR-558	0.0510004						1	0.0510004	0
										hsa-miR-181b-2-3p	0.0513927						1	0.0513927	0
										hsa-miR-3613-3p		0.0517104					1	0.0517104	0
										hsa-miR-374a-5p	0.0521773						1	0.0521773	1
										hsa-miR-1237-3p		0.052506					1	0.052506	0
										hsa-miR-6859-3p	0.0525696						1	0.0525696	0
										hsa-miR-3682-5p	0.0529619						1	0.0529619	0
										hsa-miR-718		0.0533015					1	0.0533015	1
										hsa-miR-3650	0.0533543						1	0.0533543	0
										hsa-miR-106a-3p	0.0537466						1	0.0537466	0
										hsa-miR-3615	0.0541389						1	0.0541389	0
										hsa-miR-520h	0.0545312						1	0.0545312	0
										hsa-miR-3614-5p		0.0548926					1	0.0548926	0
										hsa-miR-4297	0.0549235						1	0.0549235	0
										hsa-miR-6892-3p	0.0553158						1	0.0553158	0
										hsa-miR-1278	0.0557081						1	0.0557081	0
										hsa-miR-4793-3p	0.0561004						1	0.0561004	0
										hsa-miR-1267		0.0564837					1	0.0564837	0
										hsa-miR-3612	0.0564927						1	0.0564927	0
										hsa-miR-940		0.0572792					1	0.0572792	0
										hsa-miR-3138		0.0580748					1	0.0580748	0
										hsa-miR-1228-3p		0.0588703					1	0.0588703	0
										hsa-miR-3937		0.0596659					1	0.0596659	0
										hsa-miR-4298		0.0604614					1	0.0604614	0
										hsa-miR-3663-3p		0.061257					1	0.061257	0
										hsa-miR-3679-5p		0.0620525					1	0.0620525	0
										hsa-miR-4327		0.0628481					1	0.0628481	0
										hsa-miR-1224-5p		0.0636436					1	0.0636436	0
										hsa-miR-150-5p		0.0644391					1	0.0644391	0
										hsa-miR-630		0.0652347					1	0.0652347	1
										hsa-miR-3188		0.0660302					1	0.0660302	0
										hsa-miR-762		0.0668258					1	0.0668258	0
										hsa-miR-3141		0.0676213					1	0.0676213	1
										hsa-miR-671-5p		0.0692124					1	0.0692124	0
										hsa-miR-4270		0.070008					1	0.070008	0
										hsa-miR-1915-3p		0.0708035					1	0.0708035	1
										hsa-miR-188-5p		0.071599					1	0.071599	0
										hsa-miR-575		0.0723946					1	0.0723946	0
										hsa-miR-2276-3p		0.0739857					1	0.0739857	0
										hsa-miR-1268a		0.0747812					1	0.0747812	1
										hsa-miR-1249-3p		0.0755768					1	0.0755768	0
										hsa-miR-1914-5p		0.0763723					1	0.0763723	0
										hsa-miR-642b-3p		0.0771679					1	0.0771679	0
										hsa-miR-3194-5p		0.0779634					1	0.0779634	0
										hsa-miR-320a-3p		0.0787589					1	0.0787589	0
										hsa-miR-3196		0.0795545					1	0.0795545	0
										hsa-miR-1225-5p		0.08035					1	0.08035	0
										hsa-miR-135a-5p		0.0811456					1	0.0811456	1
										hsa-miR-939-5p		0.0827367					1	0.0827367	0
										hsa-miR-4281		0.0835322					1	0.0835322	0
										hsa-miR-3648		0.0843278					1	0.0843278	0
										hsa-miR-1207-5p		0.0851233					1	0.0851233	0
										hsa-miR-557		0.0859189					1	0.0859189	0
										hsa-miR-2861		0.0867144					1	0.0867144	1
										hsa-miR-1275		0.0875099					1	0.0875099	0

## Sheet: DN_blood_
Table S3. Up- and down-regulated miRNAs were reported in blood samples of diabetic nephropathy
Down-regulated miRNAs							Up-regulated miRNAs
miRNA	F.He , 2014 (DN)	J. D. Massaro, 2019 (DN)	H. Kim , 2019 (DN)	Studies with the same direction	Average ranking score	Studies with opposite direction	miRNA	F.He , 2014 (DN)	J. D. Massaro, 2019 (DN)	H. Kim , 2019 (DN)	Studies with the same direction	Average ranking score	Studies with opposite direction
hsa-miR-215-5p	0.00115473			1	0.00115473	0	hsa-miR-193a-5p	0.00923788	0.00214362		2	0.00569075	0
hsa-miR-495-3p	0.00230947			1	0.00230947	0	hsa-miR-25-3p	0.00115473			1	0.00115473	0
hsa-miR-497-5p	0.0034642			1	0.0034642	0	hsa-miR-450a-5p	0.00230947			1	0.00230947	0
hsa-miR-30e-5p	0.00461894			1	0.00461894	0	hsa-miR-129-2-3p	0.0034642			1	0.0034642	0
hsa-miR-186-5p	0.00577367			1	0.00577367	1	hsa-miR-511-5p	0.00461894			1	0.00461894	0
hsa-miR-34c-5p	0.00692841			1	0.00692841	0	hsa-miR-491-5p	0.00577367			1	0.00577367	0
hsa-miR-29a-3p	0.00808314			1	0.00808314	0	hsa-miR-15a-5p	0.00692841			1	0.00692841	0
hsa-miR-145-5p	0.00923788			1	0.00923788	0	hsa-miR-92a-3p	0.00808314			1	0.00808314	0
hsa-miR-221-3p	0.0103926			1	0.0103926	0	hsa-miR-135a-5p	0.0103926			1	0.0103926	0
hsa-miR-205-5p	0.0115473			1	0.0115473	0	hsa-miR-21-5p	0.0115473			1	0.0115473	0
hsa-miR-29c-3p	0.0127021			1	0.0127021	0	hsa-miR-146a-5p	0.0127021			1	0.0127021	0
hsa-miR-200c-3p	0.0138568			1	0.0138568	0	hsa-miR-377-3p	0.0138568			1	0.0138568	0
hsa-miR-34a-5p	0.0150115			1	0.0150115	0	hsa-miR-484	0.0150115			1	0.0150115	0
hsa-miR-204-5p	0.0161663			1	0.0161663	0	hsa-miR-216a-5p	0.0161663			1	0.0161663	1
hsa-miR-486-5p	0.017321			1	0.017321	0	hsa-miR-487b-3p	0.017321			1	0.017321	0
hsa-miR-214-3p	0.0184758			1	0.0184758	0	hsa-miR-126-3p	0.0184758			1	0.0184758	0
hsa-miR-216a-5p	0.0196305			1	0.0196305	1	hsa-miR-20b-5p	0.0196305			1	0.0196305	0
hsa-miR-194-5p	0.0207852			1	0.0207852	0	hsa-miR-17-5p	0.0207852			1	0.0207852	0
hsa-miR-96-5p		0.000535906		1	0.000535906	0	hsa-miR-30d-5p	0.0230947			1	0.0230947	0
hsa-miR-4485-3p		0.00107181		1	0.00107181	0	hsa-miR-31-5p	0.0242494			1	0.0242494	0
hsa-miR-3168		0.00160772		1	0.00160772	0	hsa-miR-155-5p	0.0254042			1	0.0254042	0
hsa-miR-409-5p		0.00214362		1	0.00214362	0	hsa-miR-210-3p	0.0265589			1	0.0265589	0
hsa-miR-1271-5p		0.00267953		1	0.00267953	0	hsa-miR-30b-5p	0.0277136			1	0.0277136	0
hsa-miR-501-3p		0.00321543		1	0.00321543	0	hsa-miR-15b-5p	0.0288684			1	0.0288684	0
hsa-miR-8485			0.000386847	1	0.000386847	0	hsa-miR-195-5p	0.0300231			1	0.0300231	0
hsa-miR-6739-5p			0.000773694	1	0.000773694	0	hsa-miR-370-3p	0.0311778			1	0.0311778	0
hsa-miR-6751-3p			0.00232108	1	0.00232108	0	hsa-miR-140-5p	0.0323326			1	0.0323326	1
hsa-miR-4484			0.00270793	1	0.00270793	0	hsa-miR-381-3p	0.0334873			1	0.0334873	0
hsa-miR-7847-3p			0.00309478	1	0.00309478	0	hsa-miR-501-5p	0.034642			1	0.034642	0
hsa-miR-140-5p			0.00386847	1	0.00386847	1	hsa-miR-192-5p	0.0357968			1	0.0357968	0
							hsa-miR-186-5p	0.0369515			1	0.0369515	1
							hsa-miR-93-5p	0.0381062			1	0.0381062	0
							hsa-miR-9-5p		0.000535906		1	0.000535906	0
							hsa-miR-1249-3p		0.00107181		1	0.00107181	0
							hsa-miR-3934-5p		0.00160772		1	0.00160772	0
							hsa-miR-122-5p			0.000386847	1	0.000386847	0
							hsa-miR-432-5p			0.000773694	1	0.000773694	0
							hsa-miR-193b-5p			0.00116054	1	0.00116054	0
							hsa-miR-4488			0.00232108	1	0.00232108	0
							hsa-miR-26b-3p			0.00270793	1	0.00270793	0
							hsa-miR-23a-5p			0.00309478	1	0.00309478	0
							hsa-let-7a-3p			0.00386847	1	0.00386847	0

## Sheet: IgAN_blood
Table S4. Up- and down-regulated miRNAs were reported in blood samples of IgA nephropathy
Down-regulated miRNAs								Up-regulated miRNAs
miRNA	G. Serino, 2012 (IgAN)	Z. Wang, 2020 (IgAN)	J.Wu, 2018 (IgAN)	B. Y. Xu, 2020 (IgAN)	Studies with the same direction	Average ranking score	Studies with opposite direction	miRNA	G. Serino, 2012 (IgAN)	Z. Wang, 2020 (IgAN)	J.Wu, 2018 (IgAN)	B. Y. Xu, 2020 (IgAN)	Studies with the same direction	Average ranking score	Studies with opposite direction
hsa-miR-451a	0.00138313				1	0.00138313	0	hsa-let-7c	0.00414938				1	0.00414938	0
hsa-miR-575	0.00276625				1	0.00276625	0	hsa-miR-134-5p	0.0055325				1	0.0055325	0
hsa-miR-6782-5p		0.000386847			1	0.000386847	0	hsa-let-7d	0.00691563				1	0.00691563	0
hsa-miR-4742-5p		0.000773694			1	0.000773694	0	hsa-let-7b	0.00829876				1	0.00829876	0
hsa-miR-3121-3p		0.00116054			1	0.00116054	0	hsa-miR-423-5p	0.00968188				1	0.00968188	0
hsa-miR-122-5p		0.00154739			1	0.00154739	0	hsa-miR-128-3p	0.011065				1	0.011065	0
hsa-miR-490-3p		0.00193424			1	0.00193424	0	hsa-miR-361-3p	0.0124481				1	0.0124481	0
hsa-miR-203a-3p		0.00232108			1	0.00232108	0	hsa-miR-98-5p	0.0138313				1	0.0138313	0
hsa-miR-6754-3p		0.00270793			1	0.00270793	0	hsa-let-7i	0.0152144				1	0.0152144	0
hsa-miR-548j-3p		0.00309478			1	0.00309478	0	hsa-miR-374b-5p	0.0165975				1	0.0165975	0
hsa-miR-200a-3p		0.00348162			1	0.00348162	0	hsa-let-7f-5p	0.0179806				1	0.0179806	0
hsa-miR-664b-3p		0.00386847			1	0.00386847	0	hsa-miR-93-5p	0.0193638				1	0.0193638	0
hsa-miR-7705		0.00425532			1	0.00425532	0	hsa-miR-18a-5p	0.0207469				1	0.0207469	0
hsa-miR-3146		0.00464217			1	0.00464217	0	hsa-miR-148b-3p	0.02213				1	0.02213	0
hsa-miR-561-5p		0.00502901			1	0.00502901	0	hsa-miR-7-5p	0.0235131				1	0.0235131	0
hsa-miR-412-5p		0.00541586			1	0.00541586	0	hsa-miR-18b-5p	0.0248963				1	0.0248963	0
hsa-miR-665		0.00580271			1	0.00580271	0	hsa-miR-500a-3p	0.0262794				1	0.0262794	0
hsa-miR-96-5p		0.00618956			1	0.00618956	0	hsa-miR-502-3p	0.0276625				1	0.0276625	0
hsa-miR-6849-5p		0.0065764			1	0.0065764	0	hsa-miR-107	0.0290456				1	0.0290456	0
hsa-miR-3692-3p		0.00696325			1	0.00696325	0	hsa-miR-103a-3p	0.0304288				1	0.0304288	0
hsa-miR-4504		0.0073501			1	0.0073501	0	hsa-let-7a-5p	0.0318119				1	0.0318119	0
hsa-miR-429		0.00773694			1	0.00773694	1	hsa-miR-185-5p	0.033195				1	0.033195	0
hsa-miR-6894-5p		0.00812379			1	0.00812379	0	hsa-miR-17-5p	0.0345781				1	0.0345781	0
hsa-miR-6508-3p		0.00851064			1	0.00851064	0	hsa-miR-221-3p	0.0359613				1	0.0359613	0
hsa-miR-195-5p		0.00889749			1	0.00889749	0	hsa-miR-660-5p	0.0373444				1	0.0373444	0
hsa-miR-664a-5p		0.00928433			1	0.00928433	0	hsa-miR-7-1-3p	0.0387275				1	0.0387275	0
hsa-miR-3200-5p		0.00967118			1	0.00967118	0	hsa-miR-20b-5p	0.0401107				1	0.0401107	0
hsa-miR-4660		0.010058			1	0.010058	0	hsa-miR-425-5p	0.0414938				1	0.0414938	0
hsa-miR-4511		0.0104449			1	0.0104449	0	hsa-miR-188-5p	0.0428769				1	0.0428769	0
hsa-miR-485-3p			0.00595238		1	0.00595238	0	hsa-miR-340-5p	0.04426				1	0.04426	0
hsa-miR-106b-5p			0.0119048		1	0.0119048	1	hsa-miR-342-5p	0.0456432				1	0.0456432	0
hsa-miR-4772-3p				0.000526316	1	0.000526316	0	hsa-miR-199b-3p	0.0484094				1	0.0484094	0
hsa-miR-146b-3p				0.00105263	1	0.00105263	0	hsa-miR-5100		0.000386847			1	0.000386847	0
hsa-miR-424-5p				0.00157895	1	0.00157895	0	hsa-miR-6843-3p		0.000773694			1	0.000773694	0
hsa-miR-140-3p				0.00210526	1	0.00210526	0	hsa-miR-3120-5p		0.00116054			1	0.00116054	0
								hsa-miR-204-5p		0.00154739			1	0.00154739	0
								hsa-miR-873-5p		0.00193424			1	0.00193424	0
								hsa-miR-4661-5p		0.00232108			1	0.00232108	0
								hsa-miR-671-3p		0.00270793			1	0.00270793	0
								hsa-miR-184		0.00309478			1	0.00309478	0
								hsa-miR-3675-3p		0.00348162			1	0.00348162	0
								hsa-miR-1287-5p		0.00386847			1	0.00386847	0
								hsa-miR-6842-3p		0.00425532			1	0.00425532	0
								hsa-miR-1250-5p		0.00464217			1	0.00464217	0
								hsa-miR-4443		0.00502901			1	0.00502901	0
								hsa-miR-1275		0.00541586			1	0.00541586	0
								hsa-miR-6500-3p		0.00580271			1	0.00580271	0
								hsa-miR-1260a		0.00618956			1	0.00618956	0
								hsa-miR-6732-3p		0.0065764			1	0.0065764	0
								hsa-miR-296-3p		0.00696325			1	0.00696325	0
								hsa-miR-224-5p		0.0073501			1	0.0073501	0
								hsa-miR-1246		0.00773694			1	0.00773694	0
								hsa-miR-4664-3p		0.00812379			1	0.00812379	0
								hsa-miR-7155-3p		0.00851064			1	0.00851064	0
								hsa-miR-129-5p		0.00889749			1	0.00889749	0
								hsa-miR-1290		0.00928433			1	0.00928433	0
								hsa-miR-6748-3p		0.00967118			1	0.00967118	0
								hsa-miR-548t-5p		0.010058			1	0.010058	0
								hsa-miR-148a-3p		0.0104449			1	0.0104449	0
								hsa-miR-3074-3p		0.0108317			1	0.0108317	0
								hsa-miR-1260b		0.0112186			1	0.0112186	0
								hsa-miR-135a-3p		0.0116054			1	0.0116054	0
								hsa-miR-1233-3p		0.0119923			1	0.0119923	0
								hsa-miR-6772-3p		0.0123791			1	0.0123791	0
								hsa-miR-4741		0.012766			1	0.012766	0
								hsa-miR-3605-3p		0.0131528			1	0.0131528	0
								hsa-miR-744-5p		0.0135397			1	0.0135397	0
								hsa-miR-7704		0.0139265			1	0.0139265	0
								hsa-miR-1273h-3p		0.0143133			1	0.0143133	0
								hsa-miR-5701		0.0147002			1	0.0147002	0
								hsa-miR-4746-5p		0.015087			1	0.015087	0
								hsa-miR-6784-3p		0.0154739			1	0.0154739	0
								hsa-miR-1266-5p		0.0158607			1	0.0158607	0
								hsa-miR-4505		0.0162476			1	0.0162476	0
								hsa-miR-188-3p		0.0166344			1	0.0166344	0
								hsa-miR-4761-3p		0.0170213			1	0.0170213	0
								hsa-miR-7856-5p		0.0174081			1	0.0174081	0
								hsa-miR-6735-3p		0.017795			1	0.017795	0
								hsa-miR-5690		0.0181818			1	0.0181818	0
								hsa-miR-124-3p		0.0185687			1	0.0185687	0
								hsa-miR-6762-3p		0.0189555			1	0.0189555	0
								hsa-miR-6769b-3p		0.0193424			1	0.0193424	0
								hsa-miR-92b-5p		0.0197292			1	0.0197292	0
								hsa-miR-1303		0.0201161			1	0.0201161	0
								hsa-miR-760		0.0205029			1	0.0205029	0
								hsa-miR-3131		0.0208897			1	0.0208897	0
								hsa-miR-548m		0.0212766			1	0.0212766	0
								hsa-miR-3190-3p		0.0216634			1	0.0216634	0
								hsa-miR-486-3p		0.0220503			1	0.0220503	0
								hsa-miR-4709-3p		0.0224371			1	0.0224371	0
								hsa-miR-3150a-5p		0.022824			1	0.022824	0
								hsa-miR-3944-3p		0.0232108			1	0.0232108	0
								hsa-miR-194-5p			0.00595238		1	0.00595238	0
								hsa-miR-30e-3p			0.0119048		1	0.0119048	0
								hsa-miR-106b-3p			0.0178571		1	0.0178571	0
								hsa-miR-192-5p			0.0238095		1	0.0238095	0
								hsa-miR-193b-3p			0.0297619		1	0.0297619	0
								hsa-miR-106b-5p			0.0357143		1	0.0357143	1
								hsa-miR-19b-3p			0.0416667		1	0.0416667	0
								hsa-miR-30a-5p			0.047619		1	0.047619	0
								hsa-miR-378e				0.000526316	1	0.000526316	0
								hsa-miR-378b				0.00105263	1	0.00105263	0
								hsa-miR-378d				0.00157895	1	0.00157895	0
								hsa-miR-378g				0.00210526	1	0.00210526	0
								hsa-miR-378f				0.00263158	1	0.00263158	0
								hsa-miR-429				0.00315789	1	0.00315789	1
								hsa-miR-21-3p				0.00368421	1	0.00368421	0
								hsa-miR-3909				0.00421053	1	0.00421053	0
								hsa-miR-21-5p				0.00473684	1	0.00473684	0
								hsa-miR-15b-3p				0.00526316	1	0.00526316	0
								hsa-miR-548am-3p				0.00578947	1	0.00578947	0
								hsa-miR-548aq-3p				0.00631579	1	0.00631579	0
								hsa-miR-484				0.00684211	1	0.00684211	0
								hsa-miR-499a-5p				0.00736842	1	0.00736842	0
								hsa-let-7f-1-3p				0.00789474	1	0.00789474	0
								hsa-miR-345-5p				0.00842105	1	0.00842105	0
								hsa-miR-34c-5p				0.00894737	1	0.00894737	0
								hsa-miR-15b-5p				0.00947368	1	0.00947368	0

## Sheet: CKD_blood
Table S5. Up- and down-regulated miRNAs were reported in blood samples of chronic kidney disease
Down-regulated miRNAs								Up-regulated miRNAs
miRNA	M. Ulbing, 2016 (CKD)	X. Liu, 2020 (CKD V)	X. Liu, 2020 (CKD I)	P. Nandakumar, 2017 (CKD)	Studies with the same direction	Average ranking score	Studies with opposite direction	miRNA	M. Ulbing, 2016 (CKD)	X. Liu, 2020 (CKD V)	X. Liu, 2020 (CKD I)	P. Nandakumar, 2017 (CKD)	Studies with the same direction	Average ranking score	Studies with opposite direction
hsa-let-7g-5p	0.0125		0.00116054		2	0.00683027	0	hsa-miR-483-5p		0.000386847	0.00232108		2	0.00135397	0
hsa-miR-106b-5p	0.0325	0.00967118			2	0.0210856	0	hsa-miR-143-3p	0.00125				1	0.00125	0
hsa-miR-130a-3p		0.00464217		0.00576369	2	0.00520293	0	hsa-miR-1283	0.0025				1	0.0025	0
hsa-let-7a-5p		0.0116054	0.00425532		2	0.00793037	0	hsa-miR-1253	0.00375				1	0.00375	0
hsa-miR-181d-5p		0.0119923	0.00193424		2	0.00696325	0	hsa-miR-1286	0.005				1	0.005	0
hsa-miR-223-3p	0.00125				1	0.00125	0	hsa-miR-192-5p	0.00625				1	0.00625	0
hsa-miR-451a	0.0025				1	0.0025	0	hsa-miR-1236-3p	0.0075				1	0.0075	0
hsa-miR-23a-3p	0.00375				1	0.00375	0	hsa-miR-578	0.00875				1	0.00875	0
hsa-miR-142-3p	0.005				1	0.005	1	hsa-miR-3934-5p	0.01				1	0.01	0
hsa-miR-93-5p	0.00625				1	0.00625	0	hsa-miR-1183	0.01125				1	0.01125	0
hsa-miR-1976	0.02375				1	0.02375	0	hsa-miR-1185-5p	0.0125				1	0.0125	0
hsa-miR-4454	0.00875				1	0.00875	0	hsa-miR-3614-5p	0.01375				1	0.01375	0
hsa-miR-146a-5p	0.01				1	0.01	0	hsa-miR-384	0.015				1	0.015	0
hsa-miR-631	0.01125				1	0.01125	0	hsa-miR-598-3p	0.01625				1	0.01625	0
hsa-miR-548d-3p	0.01375				1	0.01375	0	hsa-miR-216b-5p	0.0175				1	0.0175	0
miR-20b-5p	0.015				1	0.015	0	hsa-miR-520a-5p	0.01875				1	0.01875	0
hsa-miR-92a-3p	0.01625				1	0.01625	0	hsa-miR-573	0.02				1	0.02	0
hsa-miR-26a-5p	0.0175				1	0.0175	0	hsa-miR-133b		0.000773694			1	0.000773694	0
hsa-miR-185-5p	0.01875				1	0.01875	0	hsa-miR-196a-5p		0.00154739			1	0.00154739	0
hsa-miR-22-3p	0.02				1	0.02	0	hsa-miR-378f		0.00193424			1	0.00193424	0
hsa-miR-361-5p	0.02125				1	0.02125	0	hsa-miR-122-5p			0.000386847		1	0.000386847	0
hsa-let-7b-5p	0.03				1	0.03	0	hsa-miR-486-5p			0.00116054		1	0.00116054	0
hsa-miR-512-5p	0.025				1	0.025	0	hsa-miR-423-5p			0.00154739		1	0.00154739	0
hsa-miR-888-5p	0.02625				1	0.02625	0	hsa-miR-193b-5p			0.00193424		1	0.00193424	0
hsa-miR-148a-3p	0.0275				1	0.0275	0	hsa-miR-4732-5p			0.00270793		1	0.00270793	0
miR-106a-5p	0.02875				1	0.02875	0	hsa-miR-4732-3p			0.00309478		1	0.00309478	0
hsa-miR-191-5p	0.03125				1	0.03125	0	hsa-miR-7706			0.00348162		1	0.00348162	0
hsa-miR-150-5p	0.03375				1	0.03375	0	hsa-miR-29c-5p				0.00288184	1	0.00288184	0
hsa-miR-144-3p		0.000386847			1	0.000386847	0	hsa-miR-345-5p				0.00576369	1	0.00576369	1
hsa-miR-486-3p		0.00154739			1	0.00154739	0	hsa-miR-142-3p				0.00864553	1	0.00864553	1
hsa-miR-584-5p		0.00116054			1	0.00116054	0	hsa-miR-339-3p				0.0115274	1	0.0115274	0
hsa-miR-363-3p		0.00193424			1	0.00193424	0
hsa-miR-654-3p		0.00232108			1	0.00232108	0
hsa-miR-409-3p		0.00270793			1	0.00270793	0
hsa-miR-495-3p		0.00309478			1	0.00309478	0
hsa-miR-493-3p		0.00348162			1	0.00348162	0
hsa-miR-4446-3p		0.00386847			1	0.00386847	0
hsa-miR-144-5p		0.00425532			1	0.00425532	0
hsa-miR-381-3p		0.00502901			1	0.00502901	0
hsa-miR-654-5p		0.00541586			1	0.00541586	0
hsa-miR-432-5p		0.00580271			1	0.00580271	0
hsa-miR-4433b-5p		0.00618956			1	0.00618956	0
hsa-miR-671-3p		0.0065764			1	0.0065764	0
hsa-miR-424-3p		0.00696325			1	0.00696325	0
hsa-miR-32-5p		0.0073501			1	0.0073501	0
hsa-miR-22-5p		0.00773694			1	0.00773694	0
hsa-miR-589-5p		0.00812379			1	0.00812379	0
hsa-miR-185-3p		0.00851064			1	0.00851064	0
hsa-miR-24-3p		0.00928433			1	0.00928433	0
hsa-miR-28-5p		0.010058			1	0.010058	0
hsa-miR-323a-3p		0.0104449			1	0.0104449	0
hsa-miR-339-5p		0.0123791			1	0.0123791	0
hsa-miR-107		0.012766			1	0.012766	0
hsa-miR-361-3p		0.0131528			1	0.0131528	0
hsa-miR-345-5p		0.0135397			1	0.0135397	1
hsa-miR-181a-5p		0.0143133			1	0.0143133	0
hsa-let-7f-5p			0.000773694		1	0.000773694	0
hsa-miR-26b-5p			0.00154739		1	0.00154739	0
hsa-miR-98-5p			0.00232108		1	0.00232108	0
hsa-let-7i-5p			0.00270793		1	0.00270793	0
hsa-miR-30e-3p			0.00348162		1	0.00348162	0
hsa-miR-17-5p				0.00288184	1	0.00288184	0

## Sheet: IgAN_urine
Table S6. Up- and down-regulated urinary miRNAs were reported in IgA nephropathy
Down-regulated miRNAs							Up-regulated miRNAs
miRNA	T. Konta, 2014 (IgAN)	C. C. Szeto, 2019 (IgAN)	N. Wang, 2015 (IgAN)	Studies with the same direction	Average ranking score	Studies with opposite direction	miRNA	T. Konta, 2014 (IgAN)	C. C. Szeto, 2019 (IgAN)	Q. H. Min, 2018 (IgAN)	N. Wang, 2015 (IgAN)	Studies with the same direction	Average ranking score	Studies with opposite direction
hsa-miR-6751-3p			0.000387898	1	0.000387898	0	hsa-miR-223-3p	0.00875099			0.00349108	2	0.00612104	0
hsa-miR-1257			0.000775795	1	0.000775795	0	hsa-miR-15a-5p		0.005		0.00737005	2	0.00618503	0
hsa-miR-3194-5p	0.000795545			1	0.000795545	0	hsa-miR-425-5p	0.0190931			0.00620636	2	0.0126497	0
hsa-miR-7855-5p			0.00116369	1	0.00116369	0	hsa-miR-16-5p			0.0369004	0.00193949	2	0.0194199	0
hsa-miR-34b-5p		0.00125		1	0.00125	0	hsa-miR-320c	0.0365951		0.0202952		2	0.0284451	0
hsa-miR-7110-5p			0.00155159	1	0.00155159	0	hsa-miR-150-5p	0.0628481			0.00310318	2	0.0329756	0
hsa-miR-572	0.00159109			1	0.00159109	0	hsa-miR-146a-5p				0.000387898	1	0.000387898	0
hsa-miR-378b			0.00193949	1	0.00193949	0	hsa-miR-132-3p				0.000775795	1	0.000775795	0
hsa-miR-2276-3p	0.00238663			1	0.00238663	0	hsa-miR-574-3p	0.000795545				1	0.000795545	0
hsa-miR-142-5p		0.0025		1	0.0025	0	hsa-miR-378i			0.000922509		1	0.000922509	0
hsa-miR-320a-3p	0.00318218			1	0.00318218	0	hsa-miR-25-3p				0.00116369	1	0.00116369	0
hsa-miR-542-3p		0.00375		1	0.00375	0	hsa-let-7g		0.00125			1	0.00125	0
hsa-miR-3648	0.00397772			1	0.00397772	0	hsa-miR-143-3p				0.00155159	1	0.00155159	0
hsa-miR-557	0.00477327			1	0.00477327	0	hsa-miR-197-3p	0.00159109				1	0.00159109	0
hsa-miR-615-5p		0.005		1	0.005	0	hsa-miR-215-5p			0.00184502		1	0.00184502	0
hsa-miR-574-5p		0.00625		1	0.00625	1	hsa-miR-155-5p				0.00232739	1	0.00232739	0
hsa-miR-671-5p	0.00636436			1	0.00636436	0	hsa-miR-3646	0.00238663				1	0.00238663	0
hsa-miR-575	0.0071599			1	0.0071599	0	hsa-miR-26a-1-3p		0.0025			1	0.0025	0
hsa-miR-518f-3p		0.0075		1	0.0075	0	hsa-miR-145-5p				0.00271528	1	0.00271528	0
hsa-miR-135a-5p	0.00795545			1	0.00795545	0	hsa-miR-135b-5p			0.00276753		1	0.00276753	0
hsa-miR-30a-5p		0.00875		1	0.00875	0	hsa-miR-1281	0.00318218				1	0.00318218	0
hsa-miR-1224-5p	0.00875099			1	0.00875099	0	hsa-miR-486-5p			0.00369004		1	0.00369004	0
hsa-miR-3937	0.00954654			1	0.00954654	0	hsa-miR-150-3p		0.00375			1	0.00375	0
hsa-miR-526a-5p		0.01		1	0.01	0	hsa-let-7i-5p				0.00387898	1	0.00387898	0
hsa-miR-3188	0.0103421			1	0.0103421	0	hsa-miR-129-2-3p	0.00397772				1	0.00397772	0
hsa-miR-663a	0.0111376			1	0.0111376	0	hsa-miR-146b-5p				0.00426687	1	0.00426687	0
hsa-miR-651-5p		0.01125		1	0.01125	0	hsa-miR-708-5p			0.00461255		1	0.00461255	1
hsa-miR-936	0.0119332			1	0.0119332	0	hsa-miR-106b-5p				0.00465477	1	0.00465477	0
hsa-miR-1283		0.0125		1	0.0125	0	hsa-miR-1825	0.00477327				1	0.00477327	0
hsa-miR-718	0.0127287			1	0.0127287	0	hsa-miR-342-5p				0.00504267	1	0.00504267	0
hsa-miR-514b-5p	0.0135243			1	0.0135243	0	hsa-miR-19b-3p				0.00543057	1	0.00543057	0
hsa-miR-361-3p		0.01375		1	0.01375	0	hsa-mir-451a			0.00553506		1	0.00553506	0
hsa-miR-3138	0.0143198			1	0.0143198	0	hsa-miR-129-5p	0.00556881				1	0.00556881	0
hsa-miR-1206		0.015		1	0.015	0	hsa-miR-15b-5p				0.00581846	1	0.00581846	0
hsa-miR-548q	0.0151154			1	0.0151154	0	hsa-miR-423-3p		0.00625			1	0.00625	0
hsa-miR-3610	0.0159109			1	0.0159109	0	hsa-miR-4284	0.00636436				1	0.00636436	0
hsa-miR-206		0.01625		1	0.01625	0	hsa-mir-146a			0.00645756		1	0.00645756	0
hsa-miR-125a-3p	0.0167064			1	0.0167064	0	hsa-miR-23a-3p				0.00659426	1	0.00659426	0
hsa-miR-10a-5p		0.0175		1	0.0175	0	hsa-miR-28-5p				0.00698216	1	0.00698216	0
hsa-miR-3180-3p	0.017502			1	0.017502	0	hsa-miR-3613-3p	0.0071599				1	0.0071599	0
hsa-miR-371a-5p	0.0182975			1	0.0182975	0	hsa-miR-365b-3p			0.00738007		1	0.00738007	0
hsa-miR-655-3p		0.01875		1	0.01875	0	hsa-miR-193b-3p		0.0075			1	0.0075	0
hsa-miR-3131	0.0190931			1	0.0190931	0	hsa-miR-126-3p				0.00775795	1	0.00775795	0
hsa-miR-1226-3p	0.0198886			1	0.0198886	0	hsa-miR-574-5p	0.00795545				1	0.00795545	1
hsa-miR-204-3p		0.02		1	0.02	0	hsa-miR-107				0.00814585	1	0.00814585	0
hsa-miR-601	0.0206842			1	0.0206842	0	hsa‐miR‐211‐5p			0.00830258		1	0.00830258	0
hsa-miR-30c-5p		0.02125		1	0.02125	0	hsa-let-7a-5p				0.00853375	1	0.00853375	0
hsa-miR-659-3p	0.0214797			1	0.0214797	0	hsa-miR-221-3p		0.00875			1	0.00875	0
hsa-miR-3667-5p	0.0222753			1	0.0222753	0	hsa-miR-342-3p				0.00892164	1	0.00892164	0
hsa-miR-335-5p		0.0225		1	0.0225	0	hsa‐miR‐509‐3p			0.00922509		1	0.00922509	0
hsa-miR-3917	0.0230708			1	0.0230708	0	hsa-miR-26a-5p				0.00930954	1	0.00930954	0
hsa-miR-300		0.02375		1	0.02375	0	hsa-miR-766-3p	0.00954654				1	0.00954654	0
hsa-miR-188-5p		0.025		1	0.025	1	hsa-let-7g-5p				0.00969744	1	0.00969744	0
hsa-miR-708-5p		0.02625		1	0.02625	1	hsa-miR-378a-5p&hsa-miR-378a-3p		0.01			1	0.01	0
hsa-miR-137-3p		0.0275		1	0.0275	0	hsa-miR-20a-5p				0.0100853	1	0.0100853	0
hsa-miR-431-3p		0.02875		1	0.02875	0	hsa‐miR‐514a‐3p			0.0101476		1	0.0101476	0
hsa-miR-555		0.03		1	0.03	0	hsa-miR-933	0.0103421				1	0.0103421	0
hsa-miR-548g-3p		0.03125		1	0.03125	0	hsa-miR-214-3p				0.0104732	1	0.0104732	0
							hsa‐miR‐181c‐5p			0.0110701		1	0.0110701	0
							hsa-let-7f-1	0.0111376				1	0.0111376	0
							hsa-miR-155-3p		0.01125			1	0.01125	0
							hsa-miR-149-5p	0.0119332				1	0.0119332	0
							hsa‐miR‐27a‐3p			0.0119926		1	0.0119926	0
							hsa-miR-151a-5p		0.0125			1	0.0125	0
							hsa-miR-1267	0.0127287				1	0.0127287	0
							hsa-miR-30e-3p			0.0129151		1	0.0129151	0
							hsa-let-7b	0.0135243				1	0.0135243	0
							hsa-miR-556-3p		0.01375			1	0.01375	0
							hsa‐miR‐126‐3p			0.0138376		1	0.0138376	0
							hsa-miR-365a-3p	0.0143198				1	0.0143198	0
							hsa-miR-10b-3p			0.0147601		1	0.0147601	0
							hsa-miR-16-1-3p		0.015			1	0.015	0
							hsa-miR-4310	0.0151154				1	0.0151154	0
							hsa‐miR‐34a‐5p			0.0156827		1	0.0156827	0
							hsa-miR-4312	0.0159109				1	0.0159109	0
							hsa-miR-362-5p		0.01625			1	0.01625	0
							hsa‐miR‐30b‐5p			0.0166052		1	0.0166052	0
							hsa-miR-23c	0.0167064				1	0.0167064	0
							hsa-miR-361-5p		0.0175			1	0.0175	0
							hsa-miR-33b-5p	0.017502				1	0.017502	0
							hsa‐miR‐31‐5p			0.0175277		1	0.0175277	0
							hsa-miR-92b-3p	0.0182975				1	0.0182975	0
							hsa‐let‐7g‐5p			0.0184502		1	0.0184502	0
							hsa‐miR‐374b‐5p			0.0193727		1	0.0193727	0
							hsa-miR-4313	0.0198886				1	0.0198886	0
							hsa-miR-1539	0.0206842				1	0.0206842	0
							hsa-miR-563	0.0214797				1	0.0214797	0
							hsa‐miR‐508‐3p			0.0221402		1	0.0221402	0
							hsa-miR-4323	0.0222753				1	0.0222753	0
							hsa-miR-378d			0.0230627		1	0.0230627	0
							hsa-miR-2116-5p	0.0230708				1	0.0230708	0
							hsa-miR-191-5p	0.0238663				1	0.0238663	0
							hsa‐miR‐365a‐3p			0.0239852		1	0.0239852	0
							hsa-miR-550a-5p	0.0246619				1	0.0246619	0
							hsa‐miR‐326			0.0249077		1	0.0249077	0
							hsa‐miR‐378a‐3p			0.0258303		1	0.0258303	0
							hsa-miR-1238-3p	0.026253				1	0.026253	0
							hsa‐miR‐361‐3p			0.0267528		1	0.0267528	0
							hsa‐miR‐146a‐5p			0.0276753		1	0.0276753	0
							hsa-miR-4306	0.0278441				1	0.0278441	0
							hsa‐miR‐29c‐5p			0.0285978		1	0.0285978	0
							hsa-miR-1225-3p	0.0286396				1	0.0286396	0
							hsa-miR-1234-3p	0.0294352				1	0.0294352	0
							hsa‐miR‐500b‐5p			0.0295203		1	0.0295203	0
							hsa-miR-602	0.0302307				1	0.0302307	0
							hsa‐miR‐10a‐3p			0.0304428		1	0.0304428	0
							hsa-miR-3679-3p	0.0310263				1	0.0310263	0
							hsa‐miR‐205‐5p			0.0313653		1	0.0313653	0
							hsa-miR-1237-3p	0.0318218				1	0.0318218	0
							hsa-miR-151b			0.0322878		1	0.0322878	0
							hsa-miR-634	0.0326173				1	0.0326173	0
							hsa-miR-374a-5p			0.0332103		1	0.0332103	0
							hsa-miR-3614-5p	0.0334129				1	0.0334129	0
							hsa‐miR‐186‐5p			0.0341328		1	0.0341328	0
							hsa-miR-940	0.0342084				1	0.0342084	0
							hsa-miR-1228-3p	0.035004				1	0.035004	0
							hsa‐miR‐29a‐3p			0.0350554		1	0.0350554	0
							hsa-miR-3180-5p	0.0357995				1	0.0357995	0
							hsa‐miR‐125a‐5p			0.0359779		1	0.0359779	0
							hsa-miR-483-5p	0.0373906				1	0.0373906	0
							hsa‐miR‐29c‐3p			0.0378229		1	0.0378229	0
							hsa-miR-4274	0.0381862				1	0.0381862	0
							hsa-miR-498-5p	0.0389817				1	0.0389817	0
							hsa-miR-1202	0.0397772				1	0.0397772	0
							hsa-miR-4257	0.0405728				1	0.0405728	0
							hsa-miR-4298	0.0413683				1	0.0413683	0
							hsa-miR-1249-3p	0.0421639				1	0.0421639	0
							hsa-miR-642b-3p	0.0429594				1	0.0429594	0
							hsa-miR-1225-5p	0.043755				1	0.043755	0
							hsa-miR-3202	0.0445505				1	0.0445505	0
							hsa-miR-296-5p	0.0453461				1	0.0453461	0
							hsa-miR-3663-3p	0.0461416				1	0.0461416	0
							hsa-miR-1914-5p	0.0469372				1	0.0469372	0
							hsa-miR-4270	0.0477327				1	0.0477327	0
							hsa-miR-3911	0.0485282				1	0.0485282	0
							hsa-miR-3679-5p	0.0493238				1	0.0493238	0
							hsa-miR-1207-5p	0.0501193				1	0.0501193	0
							hsa-miR-4271	0.0509149				1	0.0509149	0
							hsa-miR-188-5p	0.0517104				1	0.0517104	1
							hsa-miR-3141	0.052506				1	0.052506	0
							hsa-miR-1275	0.0533015				1	0.0533015	0
							hsa-miR-134-5p	0.0540971				1	0.0540971	0
							hsa-miR-1268a	0.0548926				1	0.0548926	0
							hsa-miR-4281	0.0556881				1	0.0556881	0
							hsa-miR-3162-5p	0.0564837				1	0.0564837	0
							hsa-miR-762	0.0572792				1	0.0572792	0
							hsa-miR-3196	0.0588703				1	0.0588703	0
							hsa-miR-630	0.0596659				1	0.0596659	0
							hsa-miR-1915-3p	0.0604614				1	0.0604614	0
							hsa-miR-939-5p	0.061257				1	0.061257	0
							hsa-miR-638	0.0620525				1	0.0620525	0
							hsa-miR-3665	0.0636436				1	0.0636436	0

## Sheet: LN_blood
Table S7. Up- and down-regulated miRNAs were reported in blood samples of lupus nephritis
Down-regulated miRNAs									Up-regulated miRNAs
miRNA	E. Navarro-Quiroz, 2016 (LN IV)	W. Wang, 2015 (LN early)	W. Wang, 2015 (LN late)	E. Navarro-Quiroz, 2016 (LN II)	E. Navarro-Quiroz, 2016 (LN III)	Studies with the same direction	Average ranking score	Studies with opposite direction	miRNA	E. Navarro-Quiroz, 2016 (LN II)	E. Navarro-Quiroz, 2016 (LN III)	A. Flores-Chova, 2023 (LN)	E. Navarro-Quiroz, 2016 (LN IV)	W. Wang, 2015 (LN early)	Studies with the same direction	Average ranking score	Studies with opposite direction
hsa-miR-106a-5p	0.00309478			0.0143133	0.00851064	3	0.00863959	0	hsa-miR-1260b	0.00464217	0.00309478		0.00154739	0.0134409	4	0.0056813	0
hsa-miR-19b-3p			0.0241935	0.00464217	0.00193424	3	0.0102567	0	hsa-miR-145-5p	0.00348162	0.00270793		0.000773694		3	0.00232108	0
hsa-miR-451a			0.0295699	0.000386847	0.00464217	3	0.011533	1	hsa-miR-543	0.0119923	0.00618956		0.00309478		3	0.0070922	0
hsa-miR-550a-5p	0.00270793			0.00967118	0.0235977	3	0.0119923	0	hsa-miR-625-3p	0.0108317	0.00116054		0.0116054		3	0.00786589	0
hsa-miR-20a-5p			0.0188172	0.0263056	0.00618956	3	0.0171041	0	hsa-miR-134-5p	0.00812379	0.00928433		0.00889749		3	0.00876854	0
hsa-miR-19a-3p			0.0322581	0.00232108	0.0174081	3	0.0173291	0	hsa-miR-485-5p	0.0135397	0.0104449		0.00270793		3	0.00889749	0
hsa-miR-106b-5p			0.0430108	0.0073501	0.00270793	3	0.0176896	0	hsa-miR-92a-1-5p	0.0123791	0.00464217		0.0108317		3	0.00928433	0
hsa-miR-186-5p			0.0510753	0.0116054	0.00116054	3	0.0212804	0	hsa-miR-410-3p	0.0247582	0.0197292		0.00232108		3	0.0156028	0
hsa-miR-425-5p			0.061828	0.00309478	0.00232108	3	0.0224146	0	hsa-miR-361-3p	0.0444874	0.0189555		0.0065764		3	0.0233398	0
hsa-miR-144-3p			0.0833333	0.00116054	0.00154739	3	0.0286804	1	hsa-miR-584-5p	0.00154739			0.00116054		2	0.00135397	0
hsa-miR-93-5p			0.0672043	0.00928433	0.0139265	3	0.0301384	0	hsa-miR-423-5p	0.00309478	0.000773694				2	0.00193424	1
hsa-miR-550b-2-5p	0.00116054			0.000773694		2	0.000967118	0	hsa-miR-323b-3p	0.00116054			0.00425532		2	0.00270793	0
hsa-miR-183-5p	0.000386847			0.00502901		2	0.00270793	0	hsa-miR-107			0.000386399	0.00618956		2	0.00328798	0
hsa-miR-192-5p				0.00580271	0.000773694	2	0.0032882	0	hsa-miR-589-3p		0.00502901		0.00541586		2	0.00522244	0
hsa-miR-375-3p	0.000773694			0.00773694		2	0.00425532	0	hsa-miR-320a-3p	0.00773694	0.00348162				2	0.00560928	1
hsa-miR-25-3p				0.00154739	0.00773694	2	0.00464217	1	hsa-miR-4435	0.00696325	0.00541586				2	0.00618956	0
hsa-miR-532-5p				0.0065764	0.00309478	2	0.00483559	0	hsa-miR-423-3p	0.000773694	0.0123791				2	0.0065764	1
hsa-miR-4732-3p	0.00232108			0.00812379		2	0.00522244	0	hsa-let-7c-5p	0.00580271	0.00773694				2	0.00676983	0
hsa-miR-16-5p				0.00348162	0.0123791	2	0.00793037	1	hsa-miR-3942-5p		0.00812379		0.00580271		2	0.00696325	0
hsa-miR-136-5p				0.0135397	0.00541586	2	0.00947776	0	hsa-miR-4446-3p	0.0073501			0.00851064		2	0.00793037	0
hsa-miR-4511	0.00193424			0.0193424		2	0.0106383	0	hsa-miR-1296-5p		0.00851064		0.0073501		2	0.00793037	0
hsa-miR-1306-5p	0.00348162			0.0185687		2	0.0110251	0	hsa-miR-148b-5p		0.00580271		0.0104449		2	0.00812379	0
hsa-miR-210-3p				0.00193424	0.0216634	2	0.0117988	0	hsa-miR-150-3p	0.0158607	0.00232108				2	0.00909091	0
hsa-miR-106b-3p				0.00618956	0.0208897	2	0.0135397	0	hsa-miR-2116-3p	0.00967118	0.012766				2	0.0112186	0
hsa-miR-18a-3p				0.012766	0.015087	2	0.0139265	1	hsa-miR-320c	0.0112186	0.0116054				2	0.011412	0
hsa-miR-34a-5p				0.0189555	0.0112186	2	0.015087	0	hsa-miR-181b-5p	0.0139265	0.0108317				2	0.0123791	0
hsa-miR-3158-5p				0.0201161	0.0131528	2	0.0166344	0	hsa-miR-199a-5p	0.022824			0.00193424		2	0.0123791	0
hsa-miR-6881-3p				0.0205029	0.0162476	2	0.0183752	0	hsa-miR-1284	0.0185687	0.0143133				2	0.016441	0
hsa-miR-1294				0.0232108	0.0154739	2	0.0193424	0	hsa-miR-1273h-3p	0.00928433	0.0247582				2	0.0170213	0
hsa-miR-574-3p				0.0162476	0.0232108	2	0.0197292	0	hsa-miR-125a-5p	0.0170213	0.0193424				2	0.0181818	0
hsa-miR-92a-3p				0.00696325	0.032882	2	0.0199226	0	hsa-miR-335-3p	0.0274662			0.00928433		2	0.0183752	0
hsa-miR-197-3p			0.0107527		0.0294004	2	0.0200765	0	hsa-miR-642b-5p	0.0352031	0.00193424				2	0.0185687	0
hsa-miR-5695				0.0266925	0.017795	2	0.0222437	0	hsa-miR-4286	0.0243714	0.0158607				2	0.0201161	0
hsa-miR-33b-5p				0.0170213	0.0321083	2	0.0245648	0	hsa-miR-7977	0.0363636			0.00464217		2	0.0205029	0
hsa-miR-15b-3p				0.0259188	0.0263056	2	0.0261122	0	hsa-miR-130b-5p	0.0301741			0.0112186		2	0.0206963	0
hsa-miR-550a-3-5p				0.027853	0.0243714	2	0.0261122	0	hsa-miR-146a-3p	0.0344294	0.00696325				2	0.0206963	0
hsa-miR-483-3p				0.0255319	0.0301741	2	0.027853	0	hsa-miR-369-5p	0.0386847			0.00502901		2	0.0218569	0
hsa-miR-30b-5p			0.0725806		0.0247582	2	0.0486694	0	hsa-miR-381-3p	0.0394584			0.00696325		2	0.0232108	0
hsa-miR-29c-3p			0.0994624	0.015087		2	0.0572747	0	hsa-miR-574-5p	0.0263056	0.0212766				2	0.0237911	0
hsa-miR-20b-5p			0.102151		0.0135397	2	0.0578451	0	hsa-miR-760	0.0382979	0.0119923				2	0.0251451	0
hsa-miR-17-5p			0.0887097	0.0270793		2	0.0578945	0	hsa-miR-6509-5p	0.0375242	0.0154739				2	0.026499	0
hsa-miR-221-3p			0.112903	0.0274662		2	0.0701847	0	hsa-miR-380-3p	0.0390716	0.0139265				2	0.026499	0
hsa-miR-429					0.000386847	1	0.000386847	0	hsa-miR-150-5p	0.0340426	0.0208897				2	0.0274662	0
hsa-miR-6741-3p	0.00154739					1	0.00154739	0	hsa-miR-6740-5p	0.0336557	0.022824				2	0.0282398	0
hsa-miR-320a-3p			0.00268817			1	0.00268817	2	hsa-miR-671-5p	0.0413926	0.015087				2	0.0282398	0
hsa-miR-363-3p				0.00270793		1	0.00270793	0	hsa-miR-1538	0.037911	0.0201161				2	0.0290135	0
hsa-miR-200a-3p					0.00348162	1	0.00348162	0	hsa-miR-454-3p	0.0371373	0.0232108				2	0.0301741	0
hsa-miR-215-5p					0.00386847	1	0.00386847	0	hsa-miR-7854-3p	0.04294	0.0205029				2	0.0317215	0
hsa-miR-4326					0.00425532	1	0.00425532	0	hsa-miR-28-3p	0.000386847					1	0.000386847	1
hsa-miR-101-3p				0.00425532		1	0.00425532	1	hsa-miR-451a			0.000772798			1	0.000772798	3
hsa-miR-485-3p					0.00502901	1	0.00502901	0	hsa-miR-15a-5p			0.0011592			1	0.0011592	1
hsa-miR-151b			0.00537634			1	0.00537634	0	hsa-miR-144-5p			0.0015456			1	0.0015456	1
hsa-miR-16-2-3p				0.00541586		1	0.00541586	0	hsa-miR-197-5p		0.00154739				1	0.00154739	0
hsa-miR-126b-5p					0.00580271	1	0.00580271	0	hsa-miR-16-5p			0.00193199			1	0.00193199	2
hsa-miR-873-5p					0.0065764	1	0.0065764	0	hsa-miR-146a-5p	0.00193424					1	0.00193424	1
hsa-miR-133a-3p					0.00696325	1	0.00696325	0	hsa-miR-144-3p			0.00231839			1	0.00231839	3
hsa-miR-3200-5p					0.0073501	1	0.0073501	0	hsa-miR-1233-3p					0.00268817	1	0.00268817	0
hsa-miR-3907			0.00806452			1	0.00806452	0	hsa-miR-10b-5p			0.00270479			1	0.00270479	0
hsa-miR-101a-3p					0.00812379	1	0.00812379	0	hsa-miR-199b-3p	0.00270793					1	0.00270793	0
hsa-miR-30e-5p				0.00851064		1	0.00851064	0	hsa-miR-25-3p			0.00309119			1	0.00309119	2
hsa-miR-103b				0.00889749		1	0.00889749	0	hsa-miR-101-3p			0.00347759			1	0.00347759	1
hsa-miR-101a-5p					0.00889749	1	0.00889749	0	hsa-miR-125b-5p				0.00348162		1	0.00348162	0
hsa-miR-4662a-5p					0.00928433	1	0.00928433	0	hsa-miR-99b-5p	0.00386847					1	0.00386847	0
hsa-miR-2355-5p					0.00967118	1	0.00967118	0	hsa-miR-3614-5p		0.00386847				1	0.00386847	0
hsa-miR-345-5p				0.010058		1	0.010058	0	hsa-miR-153-3p				0.00386847		1	0.00386847	0
hsa-miR-101c					0.010058	1	0.010058	0	hsa-miR-328-3p	0.00425532					1	0.00425532	0
hsa-miR-101-5p				0.0104449		1	0.0104449	0	hsa-miR-122-3p		0.00425532				1	0.00425532	0
hsa-miR-142b					0.0104449	1	0.0104449	0	hsa-miR-744-5p	0.00502901					1	0.00502901	0
hsa-miR-140-5p					0.0108317	1	0.0108317	0	hsa-miR-130b-3p					0.00537634	1	0.00537634	0
hsa-miR-144-5p				0.0108317		1	0.0108317	1	hsa-miR-330-3p	0.00541586					1	0.00541586	0
hsa-miR-32-5p				0.0112186		1	0.0112186	0	hsa-miR-409-3p	0.00618956					1	0.00618956	0
hsa-miR-3620-3p					0.0116054	1	0.0116054	0	hsa-miR-125a-3p	0.0065764					1	0.0065764	0
hsa-miR-3615				0.0119923		1	0.0119923	0	hsa-miR-4732-5p		0.0065764				1	0.0065764	0
hsa-miR-324-3p					0.0119923	1	0.0119923	1	hsa-miR-625-5p		0.0073501				1	0.0073501	0
hsa-miR-15a-5p				0.0123791		1	0.0123791	1	hsa-miR-758-3p				0.00773694		1	0.00773694	0
hsa-miR-577					0.012766	1	0.012766	0	hsa-miR-18a-3p					0.00806452	1	0.00806452	2
hsa-miR-92b-3p				0.0131528		1	0.0131528	0	hsa-miR-342-5p	0.00851064					1	0.00851064	0
hsa-let-7g-5p			0.0134409			1	0.0134409	0	hsa-miR-335-5p	0.00889749					1	0.00889749	0
hsa-miR-3200-3p				0.0139265		1	0.0139265	0	hsa-miR-218-1-3p		0.00889749				1	0.00889749	0
hsa-miR-185-5p					0.0143133	1	0.0143133	0	hsa-miR-4482-3p		0.00967118				1	0.00967118	0
hsa-miR-502-3p				0.0147002		1	0.0147002	0	hsa-miR-433-3p				0.00967118		1	0.00967118	0
hsa-miR-205-5p					0.0147002	1	0.0147002	0	hsa-miR-326	0.010058					1	0.010058	0
hsa-miR-3912-3p				0.0154739		1	0.0154739	0	hsa-miR-628-3p					0.0107527	1	0.0107527	0
hsa-miR-362-3p				0.0158607		1	0.0158607	0	hsa-miR-320b		0.0112186				1	0.0112186	0
hsa-miR-296-5p					0.0158607	1	0.0158607	0	hsa-miR-6842-3p				0.0119923		1	0.0119923	0
hsa-miR-342-3p			0.016129			1	0.016129	1	hsa-miR-323a-3p				0.0123791		1	0.0123791	0
hsa-miR-3688-5p				0.0166344		1	0.0166344	0	hsa-miR-148a-5p	0.012766					1	0.012766	0
hsa-miR-8072					0.0166344	1	0.0166344	0	hsa-miR-582-5p				0.012766		1	0.012766	0
hsa-miR-548e-5p					0.0170213	1	0.0170213	0	hsa-miR-6501-5p		0.0131528				1	0.0131528	0
hsa-miR-25-5p				0.0174081		1	0.0174081	0	hsa-miR-4645-3p				0.0131528		1	0.0131528	0
hsa-miR-21-5p				0.017795		1	0.017795	0	hsa-miR-342-3p	0.0131528					1	0.0131528	1
hsa-miR-148b-3p				0.0181818		1	0.0181818	0	hsa-miR-30c-5p		0.0135397				1	0.0135397	0
hsa-miR-576-5p					0.0181818	1	0.0181818	0	hsa-miR-654-5p				0.0135397		1	0.0135397	0
hsa-miR-624-5p					0.0189555	1	0.0189555	0	hsa-miR-380-3p				0.0139265		1	0.0139265	0
hsa-let-7a-5p					0.0193424	1	0.0193424	0	hsa-miR-4738-3p	0.0143133					1	0.0143133	0
hsa-miR-1228-3p				0.0197292		1	0.0197292	0	hsa-miR-3614-5p				0.0143133		1	0.0143133	0
hsa-miR-212-3p					0.0197292	1	0.0197292	0	hsa-miR-185-3p				0.0147002		1	0.0147002	0
hsa-miR-4785					0.0201161	1	0.0201161	0	hsa-miR-128-1-5p	0.0147002					1	0.0147002	1
hsa-miR-489-3p					0.0205029	1	0.0205029	0	hsa-miR-766-3p	0.015087					1	0.015087	0
hsa-miR-6747-3p				0.0208897		1	0.0208897	0	hsa-miR-382-5p				0.015087		1	0.015087	0
hsa-miR-378a-3p				0.0212766		1	0.0212766	0	hsa-miR-1468-5p	0.0154739					1	0.0154739	0
hsa-let-7b-5p					0.0212766	1	0.0212766	1	hsa-miR-760				0.0154739		1	0.0154739	0
hsa-miR-30d-5p			0.0215054			1	0.0215054	0	hsa-miR-4738-3p				0.0158607		1	0.0158607	0
hsa-miR-185-3p				0.0216634		1	0.0216634	1	hsa-miR-1539					0.016129	1	0.016129	0
hsa-miR-642a-5p				0.0220503		1	0.0220503	0	hsa-miR-424-3p		0.0162476				1	0.0162476	0
hsa-miR-1839-5p					0.0220503	1	0.0220503	0	hsa-miR-671-5p				0.0162476		1	0.0162476	0
hsa-miR-5100				0.0224371		1	0.0224371	0	hsa-miR-486-5p		0.0166344				1	0.0166344	0
hsa-miR-570-3p					0.0224371	1	0.0224371	0	hsa-miR-218-1-3p				0.0166344		1	0.0166344	0
hsa-miR-181a-5p				0.022824		1	0.022824	0	hsa-miR-486-3p		0.0170213				1	0.0170213	0
hsa-miR-128-1-5p					0.022824	1	0.022824	1	hsa-miR-27a-5p		0.0174081				1	0.0174081	0
hsa-miR-1303					0.0239845	1	0.0239845	0	hsa-let-7e-5p		0.017795				1	0.017795	0
hsa-miR-183-3p				0.0243714		1	0.0243714	0	hsa-let-7b-5p	0.017795					1	0.017795	1
hsa-miR-193a-3p				0.0247582		1	0.0247582	0	hsa-miR-30e-3p	0.0181818					1	0.0181818	0
hsa-miR-4646-3p				0.0251451		1	0.0251451	0	hsa-miR-431-5p		0.0181818				1	0.0181818	0
hsa-miR-548j-3p					0.0251451	1	0.0251451	0	hsa-miR-378e					0.0188172	1	0.0188172	0
hsa-miR-1983					0.0255319	1	0.0255319	0	hsa-miR-589-5p	0.0189555					1	0.0189555	0
hsa-miR-451b					0.0259188	1	0.0259188	0	hsa-miR-10a-5p	0.0193424					1	0.0193424	1
hsa-miR-377-3p					0.0266925	1	0.0266925	0	hsa-miR-6842-3p	0.0197292					1	0.0197292	0
hsa-miR-24-3p			0.0268817			1	0.0268817	1	hsa-miR-6852-5p	0.0201161					1	0.0201161	0
hsa-miR-4755-5p					0.0270793	1	0.0270793	0	hsa-miR-191-5p	0.0205029					1	0.0205029	1
hsa-miR-651-5p					0.0274662	1	0.0274662	0	hsa-miR-191-3p	0.0208897					1	0.0208897	0
hsa-miR-378i					0.027853	1	0.027853	0	hsa-miR-339-3p	0.0212766					1	0.0212766	0
hsa-miR-6850-5p					0.0282398	1	0.0282398	0	hsa-miR-7-5p					0.0215054	1	0.0215054	0
hsa-miR-1839-3p					0.0286267	1	0.0286267	0	hsa-miR-4433b-5p	0.0216634					1	0.0216634	0
hsa-miR-3928-3p					0.0290135	1	0.0290135	0	hsa-miR-330-5p	0.0220503					1	0.0220503	0
hsa-miR-10a-5p					0.0297872	1	0.0297872	1	hsa-miR-450a-5p		0.0220503				1	0.0220503	0
hsa-miR-1299					0.0305609	1	0.0305609	0	hsa-miR-887-3p	0.0224371					1	0.0224371	0
hsa-miR-4646-5p					0.0309478	1	0.0309478	0	hsa-miR-3130-5p		0.0224371				1	0.0224371	0
hsa-miR-26a-2-3p					0.0313346	1	0.0313346	0	hsa-miR-941	0.0235977					1	0.0235977	0
hsa-miR-214-5p					0.0317215	1	0.0317215	0	hsa-miR-324-3p		0.0235977				1	0.0235977	1
hsa-miR-28-3p					0.0324952	1	0.0324952	1	hsa-miR-3184-5p	0.0239845					1	0.0239845	0
hsa-miR-373-5p			0.0349462			1	0.0349462	0	hsa-miR-889-3p		0.0239845				1	0.0239845	0
hsa-miR-22-3p			0.0376344			1	0.0376344	0	hsa-miR-877-3p					0.0241935	1	0.0241935	0
hsa-miR-23a-3p			0.0403226			1	0.0403226	0	hsa-miR-484		0.0243714				1	0.0243714	1
hsa-miR-146a-5p			0.0456989			1	0.0456989	1	hsa-miR-556-5p	0.0251451					1	0.0251451	0
hsa-miR-191-5p			0.0483871			1	0.0483871	1	hsa-miR-376a-3p		0.0251451				1	0.0251451	0
hsa-miR-148a-3p			0.0537634			1	0.0537634	0	hsa-miR-874-3p	0.0255319					1	0.0255319	0
hsa-miR-26a-5p			0.0564516			1	0.0564516	0	hsa-miR-323a-3p	0.0259188					1	0.0259188	0
hsa-miR-423-3p			0.0591398			1	0.0591398	2	hsa-miR-185-3p	0.0266925					1	0.0266925	1
hsa-miR-27a-3p			0.0645161			1	0.0645161	0	hsa-miR-4301					0.0268817	1	0.0268817	0
hsa-miR-15b-5p			0.0698925			1	0.0698925	0	hsa-miR-152-3p	0.0270793					1	0.0270793	0
hsa-miR-223-3p			0.0752688			1	0.0752688	0	hsa-miR-203a-3p	0.027853					1	0.027853	0
hsa-miR-100-5p			0.077957			1	0.077957	0	hsa-miR-24-3p	0.0282398					1	0.0282398	1
hsa-miR-126-5p			0.0806452			1	0.0806452	0	hsa-miR-629-5p	0.0286267					1	0.0286267	0
hsa-miR-423-5p			0.0860215			1	0.0860215	2	hsa-miR-3605-5p	0.0290135					1	0.0290135	0
hsa-miR-365b-3p			0.0913978			1	0.0913978	0	hsa-miR-654-5p	0.0294004					1	0.0294004	0
hsa-miR-126-3p			0.094086			1	0.094086	0	hsa-miR-143-3p					0.0295699	1	0.0295699	0
hsa-miR-146b-5p			0.0967742			1	0.0967742	0	hsa-miR-221-5p	0.0297872					1	0.0297872	0
hsa-miR-484			0.104839			1	0.104839	1	hsa-let-7d-3p	0.0305609					1	0.0305609	0
hsa-miR-1247-5p			0.110215			1	0.110215	0	hsa-miR-505-3p	0.0313346					1	0.0313346	0
									hsa-miR-382-5p	0.0317215					1	0.0317215	0
									hsa-miR-320d	0.0324952					1	0.0324952	0
									hsa-miR-6819-3p	0.032882					1	0.032882	0
									hsa-miR-219a-5p	0.0348162					1	0.0348162	0
									hsa-miR-125b-2-3p	0.0355899					1	0.0355899	0
									hsa-miR-92b-5p	0.0359768					1	0.0359768	0
									hsa-miR-141-3p	0.0367505					1	0.0367505	0
									hsa-miR-181d-5p	0.0398453					1	0.0398453	0
									hsa-miR-431-3p	0.0402321					1	0.0402321	0
									hsa-miR-425-3p	0.040619					1	0.040619	0
									hsa-miR-548ae-5p	0.0410058					1	0.0410058	0
									hsa-miR-654-3p	0.0417795					1	0.0417795	0
									hsa-let-7a-3p	0.0421663					1	0.0421663	0
									hsa-miR-548j-5p	0.0425532					1	0.0425532	0
									hsa-miR-6859-5p	0.0433269					1	0.0433269	0
									hsa-miR-4466	0.0437137					1	0.0437137	0
									hsa-miR-432-5p	0.0441006					1	0.0441006	0
									hsa-miR-125b-1-3p	0.0448743					1	0.0448743	0

## Sheet: LN_kidney
Table S8. Up- and down-regulated miRNAs were reported in kidney tissue of lupus nephritis
Down-regulated miRNAs							Up-regulated miRNAs
miRNA	Y. Dai, 2009 (LN)	P. Costa-Reis, 2015 (LN/PSGN)	E. Krasoudaki, 2016 (LN)	Studies with the same direction	Average ranking score	Studies with opposite direction	miRNA	Y. Dai, 2009 (LN)	P. Costa-Reis, 2015 (LN/PSGN)	E. Krasoudaki, 2016 (LN)	Studies with the same direction	Average ranking score	Studies with opposite direction
hsa-miR-663a	0.043956	0.00817439	0.030137	3	0.0274225	0	hsa-miR-513a-5p	0.043956		0.0136986	2	0.0288273	0
hsa-miR-26a-5p		0.0027248	0.00273973	2	0.00273226	0	hsa-miR-577		0.0013624		1	0.0013624	0
hsa-miR-637	0.0153846	0.0177112		2	0.0165479	0	hsa-miR-15b-5p	0.0021978			1	0.0021978	0
hsa-miR-296-5p	0.0021978		0.0356164	2	0.0189071	0	hsa-miR-378h		0.0027248		1	0.0027248	0
hsa-let-7b		0.0163488	0.0219178	2	0.0191333	0	hsa-miR-422a			0.00273973	1	0.00273973	1
hsa-miR-557	0.0197802		0.0191781	2	0.0194792	0	hsa-miR-124-3p	0.0043956			1	0.0043956	0
hsa-miR-365a-3p	0.00659341		0.0328767	2	0.0197351	0	hsa-miR-1827		0.00544959		1	0.00544959	0
hsa-miR-223-3p	0.0351648		0.0109589	2	0.0230619	0	hsa-miR-21-5p			0.00547945	1	0.00547945	0
hsa-miR-484	0.0307692		0.0164384	2	0.0236038	0	hsa-miR-195-5p	0.00659341			1	0.00659341	0
hsa-let-7c		0.0217984	0.0273973	2	0.0245978	0	hsa-miR-548ae-3p		0.00681199		1	0.00681199	0
hsa-miR-615-3p	0.021978		0.0410959	2	0.031537	0	hsa-miR-576-5p		0.00817439		1	0.00817439	0
hsa-miR-596	0.0549451	0.0258856		2	0.0404153	0	hsa-miR-198			0.00821918	1	0.00821918	0
hsa-miR-210-3p	0.0527473	0.0408719		2	0.0468096	0	hsa-miR-608	0.00879121			1	0.00879121	0
hsa-miR-486-5p	0.0571429		0.0383562	2	0.0477495	0	hsa-miR-548j-5p		0.00953678		1	0.00953678	0
hsa-miR-4286		0.0013624		1	0.0013624	0	hsa-miR-758-3p		0.0108992		1	0.0108992	0
hsa-miR-23b-3p		0.00408719		1	0.00408719	0	hsa-miR-384			0.0109589	1	0.0109589	0
hsa-miR-30c-5p		0.00544959		1	0.00544959	0	hsa-miR-622	0.010989			1	0.010989	0
hsa-miR-133a-5p			0.00547945	1	0.00547945	0	hsa-miR-888-5p		0.0122616		1	0.0122616	0
hsa-let-7e		0.00681199		1	0.00681199	0	hsa-miR-601	0.0131868			1	0.0131868	0
hsa-miR-20a-5p			0.00821918	1	0.00821918	0	hsa-miR-548ac		0.013624		1	0.013624	0
hsa-miR-324-3p	0.00879121			1	0.00879121	0	hsa-miR-921		0.0149864		1	0.0149864	0
hsa-miR-1973		0.00953678		1	0.00953678	0	hsa-miR-30a-5p	0.0153846			1	0.0153846	1
hsa-miR-30b-5p		0.0108992		1	0.0108992	0	hsa-miR-548d-3p		0.0163488		1	0.0163488	0
hsa-miR-518b	0.010989			1	0.010989	0	hsa-mir-185			0.0164384	1	0.0164384	0
hsa-let-7a-5p		0.0122616		1	0.0122616	1	hsa-miR-130b-3p	0.0175824			1	0.0175824	0
hsa-miR-346	0.0131868			1	0.0131868	0	hsa-miR-603		0.0177112		1	0.0177112	0
hsa-miR-145-5p		0.013624		1	0.013624	0	hsa-miR-570-3p		0.0190736		1	0.0190736	0
hsa-miR-33a-5p			0.0136986	1	0.0136986	0	hsa-miR-320a-3p			0.0191781	1	0.0191781	0
hsa-miR-423-5p		0.0149864		1	0.0149864	0	hsa-miR-208a-3p	0.0197802			1	0.0197802	0
hsa-miR-133a-3p	0.0175824			1	0.0175824	0	hsa-miR-548b-5p		0.0217984		1	0.0217984	0
hsa-miR-30e-5p		0.0190736		1	0.0190736	0	hsa-miR-662	0.021978			1	0.021978	0
hsa-miR-626		0.020436		1	0.020436	0	hsa-miR-154-5p		0.0231608		1	0.0231608	0
hsa-miR-604		0.0231608		1	0.0231608	0	hsa-miR-325	0.0241758			1	0.0241758	0
hsa-miR-345-5p	0.0241758			1	0.0241758	0	hsa-miR-574-5p		0.0245232		1	0.0245232	0
hsa-miR-876-3p		0.0245232		1	0.0245232	0	hsa-miR-302d-3p		0.0258856		1	0.0258856	0
hsa-let-7d			0.0246575	1	0.0246575	0	hsa-miR-324-5p	0.0263736			1	0.0263736	0
hsa-miR-642a-5p	0.0263736			1	0.0263736	0	hsa-miR-548z		0.027248		1	0.027248	0
hsa-miR-339-5p		0.027248		1	0.027248	0	hsa-miR-185-5p	0.0285714			1	0.0285714	0
hsa-miR-654-5p	0.0285714			1	0.0285714	0	hsa-miR-1264		0.0286104		1	0.0286104	0
hsa-let-7f-5p		0.0286104		1	0.0286104	0	hsa-miR-433-3p	0.0307692			1	0.0307692	0
hsa-miR-29c-3p		0.0299728		1	0.0299728	0	hsa-let-7a-5p	0.032967			1	0.032967	1
hsa-miR-630		0.0313351		1	0.0313351	0	hsa-miR-600	0.0351648			1	0.0351648	0
hsa-miR-30a-5p		0.0326975		1	0.0326975	1	hsa-miR-658	0.0373626			1	0.0373626	0
hsa-miR-99a-5p	0.032967			1	0.032967	0	hsa-let-7a-5p	0.0395604			1	0.0395604	0
hsa-miR-20a		0.0340599		1	0.0340599	0	hsa-miR-575	0.0417582			1	0.0417582	0
hsa-miR-98-5p		0.0354223		1	0.0354223	0
hsa-miR-4284		0.0367847		1	0.0367847	0
hsa-miR-611	0.0373626			1	0.0373626	0
hsa-miR-572		0.0381471		1	0.0381471	0
hsa-miR-22-3p		0.0395095		1	0.0395095	0
hsa-miR-30d-5p	0.0395604			1	0.0395604	0
hsa-miR-500a-5p	0.0417582			1	0.0417582	0
hsa-miR-525-5p		0.0422343		1	0.0422343	0
hsa-miR-1298-5p		0.0435967		1	0.0435967	0
hsa-miR-1269a		0.0449591		1	0.0449591	0
hsa-miR-423-3p	0.0461538			1	0.0461538	0
hsa-miR-578		0.0463215		1	0.0463215	0
hsa-miR-517c-3p		0.0476839		1	0.0476839	0
hsa-miR-381-3p	0.0483516			1	0.0483516	0
hsa-miR-422a		0.0490463		1	0.0490463	1
hsa-miR-193b-3p		0.0504087		1	0.0504087	0
hsa-miR-602	0.0505495			1	0.0505495	0
hsa-miR-221-3p		0.0517711		1	0.0517711	0
hsa-miR-1243		0.0531335		1	0.0531335	0
hsa-miR-769-3p	0.0593407			1	0.0593407	0
hsa-miR-629-5p	0.0615385			1	0.0615385	0
hsa-miR-92b-3p	0.0637363			1	0.0637363	0
hsa-miR-150-5p	0.0659341			1	0.0659341	0

## Sheet: GN_urine
Table S9. Up- and down-regulated urinary miRNAs were reported in glomerulonephritis
Down-regulated miRNAs						Up-regulated miRNAs
miRNA	T. Konta, 2014 (CrGN)	R.Dai, 2023 (MsPGN)	Studies with the same direction	Average ranking score	Studies with opposite direction	miRNA	R.Dai, 2023 (MsPGN)	T. Konta, 2014 (CrGN)	Studies with the same direction	Average ranking score	Studies with opposite direction
hsa-miR-3911	0.0270485	0.0073501	2	0.0171993	0	hsa-miR-193b-3p	0.00618956	0.000795545	2	0.00349255	0
hsa-miR-1293		0.000386847	1	0.000386847	0	hsa-miR-5009-5p	0.000386847		1	0.000386847	0
hsa-miR-1228-5p		0.000773694	1	0.000773694	0	hsa-miR-1273h-3p	0.000773694		1	0.000773694	0
hsa-miR-936	0.000795545		1	0.000795545	0	hsa-miR-6721-5p	0.00116054		1	0.00116054	0
hsa-miR-942-5p		0.00116054	1	0.00116054	0	hsa-miR-296-3p	0.00154739		1	0.00154739	0
hsa-miR-4745-5p		0.00154739	1	0.00154739	0	hsa-miR-3137		0.00159109	1	0.00159109	0
hsa-miR-3180-3p	0.00159109		1	0.00159109	0	hsa-miR-6510-3p	0.00193424		1	0.00193424	0
hsa-miR-211-3p		0.00193424	1	0.00193424	0	hsa-miR-6741-3p	0.00232108		1	0.00232108	0
hsa-miR-139-3p		0.00232108	1	0.00232108	0	hsa-miR-574-3p		0.00238663	1	0.00238663	0
hsa-miR-659-3p	0.00238663		1	0.00238663	0	hsa-miR-6770-3p	0.00270793		1	0.00270793	0
hsa-miR-495-3p		0.00270793	1	0.00270793	0	hsa-miR-3907	0.00309478		1	0.00309478	0
hsa-miR-181c-5p		0.00309478	1	0.00309478	0	hsa-miR-4253		0.00318218	1	0.00318218	0
hsa-miR-3917	0.00318218		1	0.00318218	0	hsa-miR-4665-5p	0.00348162		1	0.00348162	0
hsa-miR-371a-3p		0.00348162	1	0.00348162	0	hsa-miR-3622a-5p	0.00386847		1	0.00386847	0
hsa-miR-576-3p		0.00386847	1	0.00386847	0	hsa-miR-423-5p		0.00397772	1	0.00397772	0
hsa-miR-198	0.00397772		1	0.00397772	0	hsa-miR-432-5p	0.00425532		1	0.00425532	0
hsa-miR-3126-3p		0.00425532	1	0.00425532	0	hsa-miR-3936	0.00464217		1	0.00464217	0
hsa-miR-6805-5p		0.00464217	1	0.00464217	0	hsa-miR-4290		0.00477327	1	0.00477327	0
hsa-miR-877-5p	0.00477327		1	0.00477327	1	hsa-miR-509-3p	0.00502901		1	0.00502901	0
hsa-miR-4741		0.00502901	1	0.00502901	0	hsa-let-7b-3p	0.00541586		1	0.00541586	0
hsa-miR-1294		0.00541586	1	0.00541586	0	hsa-miR-494-3p		0.00556881	1	0.00556881	0
hsa-miR-18b-5p	0.00556881		1	0.00556881	0	hsa-miR-1262	0.00580271		1	0.00580271	0
hsa-miR-6812-3p		0.00580271	1	0.00580271	0	hsa-miR-877-5p		0.00636436	1	0.00636436	1
hsa-miR-5001-5p		0.00618956	1	0.00618956	0	hsa-miR-125b-2-3p	0.0065764		1	0.0065764	0
hsa-miR-1972	0.00636436		1	0.00636436	0	hsa-miR-548o-3p	0.00696325		1	0.00696325	0
hsa-miR-1343-3p		0.0065764	1	0.0065764	0	hsa-miR-1260a		0.0071599	1	0.0071599	0
hsa-miR-3681-5p		0.00696325	1	0.00696325	0	hsa-let-7e-3p	0.0073501		1	0.0073501	0
hsa-miR-769-3p	0.0071599		1	0.0071599	0	hsa-miR-342-3p	0.00773694		1	0.00773694	0
hsa-miR-7848-3p		0.00773694	1	0.00773694	0	hsa-miR-486-5p		0.00795545	1	0.00795545	0
hsa-miR-1470	0.00795545		1	0.00795545	0	hsa-miR-374a-5p	0.00812379		1	0.00812379	0
hsa-miR-378a-5p		0.00812379	1	0.00812379	0	hsa-miR-181d-5p	0.00851064		1	0.00851064	0
hsa-miR-892a		0.00851064	1	0.00851064	0	hsa-miR-483-3p		0.00875099	1	0.00875099	0
hsa-miR-30d-5p	0.00875099		1	0.00875099	0	hsa-miR-135a-5p	0.00889749		1	0.00889749	0
hsa-miR-485-5p		0.00889749	1	0.00889749	0	hsa-miR-508-3p	0.00928433		1	0.00928433	0
hsa-miR-891a-5p		0.00928433	1	0.00928433	0	hsa-miR-1260b		0.00954654	1	0.00954654	0
hsa-miR-4322	0.00954654		1	0.00954654	0	hsa-miR-451a		0.0111376	1	0.0111376	0
hsa-miR-6514-5p		0.00967118	1	0.00967118	0	hsa-miR-583		0.0119332	1	0.0119332	0
hsa-miR-205-5p		0.010058	1	0.010058	0	hsa-miR-623		0.0127287	1	0.0127287	0
hsa-miR-1182	0.0103421		1	0.0103421	0	hsa-miR-483-5p		0.0135243	1	0.0135243	0
hsa-miR-133a-3p	0.0111376		1	0.0111376	0	hsa-miR-1181		0.0143198	1	0.0143198	0
hsa-miR-149-5p	0.0119332		1	0.0119332	0	hsa-miR-197-3p		0.0151154	1	0.0151154	0
hsa-miR-564	0.0127287		1	0.0127287	0	hsa-miR-3162-5p		0.0159109	1	0.0159109	0
hsa-miR-665	0.0143198		1	0.0143198	0	hsa-miR-630		0.0167064	1	0.0167064	0
hsa-miR-625-5p	0.0151154		1	0.0151154	0	hsa-miR-575		0.017502	1	0.017502	0
hsa-miR-1236-3p	0.0159109		1	0.0159109	0
hsa-miR-3194-5p	0.0167064		1	0.0167064	0
hsa-miR-4281	0.017502		1	0.017502	0
hsa-miR-4270	0.0182975		1	0.0182975	0
hsa-miR-3202	0.0190931		1	0.0190931	0
hsa-miR-557	0.0198886		1	0.0198886	0
hsa-miR-548q	0.0206842		1	0.0206842	0
hsa-miR-514b-5p	0.0214797		1	0.0214797	0
hsa-miR-3665	0.0222753		1	0.0222753	0
hsa-miR-1914-5p	0.0230708		1	0.0230708	0
hsa-miR-2276-3p	0.0238663		1	0.0238663	0
hsa-miR-3188	0.0246619		1	0.0246619	0
hsa-miR-296-5p	0.0254574		1	0.0254574	0
hsa-miR-3663-3p	0.026253		1	0.026253	0
hsa-miR-572	0.0278441		1	0.0278441	0
hsa-miR-3937	0.0286396		1	0.0286396	0
hsa-miR-762	0.0294352		1	0.0294352	0
hsa-miR-1249-3p	0.0302307		1	0.0302307	0
hsa-miR-3180-5p	0.0310263		1	0.0310263	0
hsa-miR-1225-5p	0.0318218		1	0.0318218	0
hsa-miR-134-5p	0.0326173		1	0.0326173	0
hsa-miR-638	0.0334129		1	0.0334129	0
hsa-miR-634	0.0342084		1	0.0342084	0
hsa-miR-3196	0.035004		1	0.035004	0

## Sheet: MCD_urine
Table S10. Up- and down-regulated urinary miRNAs were reported in Minimal change disease
Down-regulated miRNAs							Up-regulated miRNAs
miRNA	T. Konta, 2014 (MCD )	N. Wang, 2015 (MCD )	A. Ramezani, 2015 (MCD)	Studies with the same direction	Average ranking score	Studies with opposite direction	miRNA	T. Konta, 2014 (MCD )	N. Wang, 2015 (MCD )	A. Ramezani, 2015 (MCD)	Studies with the same direction	Average ranking score	Studies with opposite direction
hsa-miR-936	0.000795545		0.00288517	2	0.00184036	0	hsa-miR-30e-5p	0.00636436	0.0248254		2	0.0155949	0
hsa-miR-665	0.0127287	0.00349108		2	0.0081099	0	hsa-miR-124-3p	0.0167064	0.0221102		2	0.0194083	0
hsa-miR-3180-3p	0.00318218	0.0217223		2	0.0124522	0	hsa-miR-21-5p	0.0103421	0.0356866		2	0.0230143	0
hsa-miR-3665	0.0167064	0.0193949		2	0.0180507	0	hsa-miR-187-3p	0.017502	0.0403413		2	0.0289217	0
hsa-miR-2861	0.017502	0.019007		2	0.0182545	0	hsa-miR-30a-5p	0.000795545	0.0581846		2	0.0294901	0
hsa-miR-638	0.0214797	0.0256012		2	0.0235405	0	hsa-miR-197-3p	0.0206842	0.0477114		2	0.0341978	0
hsa-miR-1182	0.00954654	0.0496509		2	0.0295987	0	hsa-miR-141-3p	0.00875099	0.0616757		2	0.0352134	0
hsa-miR-564	0.0111376	0.0535299		2	0.0323337	0	hsa-miR-92a-3p	0.00556881	0.0818464		2	0.0437076	0
hsa-miR-939-5p	0.0182975	0.0574088		2	0.0378532	0	hsa-miR-30d-5p	0.0151154	0.07564		2	0.0453777	0
hsa-miR-198	0.00556881	0.0705974		2	0.0380831	0	hsa-miR-188-5p		0.000387898		1	0.000387898	0
hsa-miR-373-3p	0.00636436	0.0771916		2	0.041778	0	hsa-miR-1234			0.000577034	1	0.000577034	0
hsa-miR-3202	0.0206842	0.0713732		2	0.0460287	0	hsa-miR-548q		0.000775795		1	0.000775795	1
hsa-miR-557	0.0278441	0.0853375		2	0.0565908	0	hsa-miR-574-5p			0.00115407	1	0.00115407	0
hsa-miR-572	0.0159109	0.0977502		2	0.0568305	0	hsa-miR-505-5p		0.00116369		1	0.00116369	0
hsa-miR-663a	0.0246619	0.090768		2	0.057715	0	hsa-miR-4718		0.00155159		1	0.00155159	0
hsa-miR-4322		0.000387898		1	0.000387898	1	hsa-miR-455-3p		0.00193949		1	0.00193949	0
hsa-miR-2115-5p			0.000577034	1	0.000577034	0	hsa-miR-4701-5p			0.00230814	1	0.00230814	0
hsa-miR-2277-5p		0.000775795		1	0.000775795	0	hsa-miR-196b-5p		0.00232739		1	0.00232739	0
hsa-miR-4799-3p			0.00115407	1	0.00115407	0	hsa-miR-4286	0.00238663			1	0.00238663	0
hsa-miR-6806-5p		0.00155159		1	0.00155159	0	hsa-miR-26b-5p		0.00271528		1	0.00271528	0
hsa-miR-548q	0.00159109			1	0.00159109	1	hsa-miR-3591-3p			0.00288517	1	0.00288517	0
hsa-miR-4310			0.0017311	1	0.0017311	0	hsa-miR-30e-3p		0.00310318		1	0.00310318	0
hsa-miR-4462		0.00193949		1	0.00193949	0	hsa-miR-1260a	0.00318218			1	0.00318218	0
hsa-miR-4713-3p			0.00230814	1	0.00230814	0	hsa-miR-551b-3p		0.00349108		1	0.00349108	0
hsa-miR-885-3p		0.00232739		1	0.00232739	0	hsa-miR-196b-3p		0.00387898		1	0.00387898	0
hsa-miR-125a-3p	0.00238663			1	0.00238663	0	hsa-miR-22-3p	0.00397772			1	0.00397772	0
hsa-miR-6722-3p		0.00271528		1	0.00271528	0	hsa-miR-3135b		0.00426687		1	0.00426687	0
hsa-miR-6068		0.00310318		1	0.00310318	0	hsa-miR-455-5p		0.00465477		1	0.00465477	0
hsa-miR-1257		0.00387898		1	0.00387898	0	hsa-miR-1260b	0.00477327			1	0.00477327	0
hsa-miR-3667-5p	0.00397772			1	0.00397772	0	hsa-miR-29c-5p		0.00504267		1	0.00504267	0
hsa-miR-6127		0.00426687		1	0.00426687	0	hsa-miR-27b-5p		0.00543057		1	0.00543057	0
hsa-miR-4669		0.00465477		1	0.00465477	0	hsa-miR-214-3p		0.00581846		1	0.00581846	0
hsa-miR-3917	0.00477327			1	0.00477327	0	hsa-miR-335-5p		0.00620636		1	0.00620636	0
hsa-miR-6790-5p		0.00504267		1	0.00504267	0	hsa-miR-192-3p		0.00659426		1	0.00659426	0
hsa-miR-3937		0.00543057		1	0.00543057	0	hsa-miR-1287-5p		0.00698216		1	0.00698216	0
hsa-miR-6090		0.00581846		1	0.00581846	0	hsa-miR-3156-5p	0.0071599			1	0.0071599	0
hsa-miR-6824-5p		0.00620636		1	0.00620636	0	hsa-miR-509-3-5p		0.00737005		1	0.00737005	0
hsa-miR-937-5p		0.00659426		1	0.00659426	0	hsa-miR-29b-3p		0.00775795		1	0.00775795	0
hsa-miR-6734-5p		0.00698216		1	0.00698216	0	hsa-miR-10b-3p		0.00814585		1	0.00814585	0
hsa-miR-769-3p	0.0071599			1	0.0071599	1	hsa-miR-3065-3p		0.00853375		1	0.00853375	0
hsa-miR-4750-5p		0.00737005		1	0.00737005	0	hsa-miR-501-5p		0.00892164		1	0.00892164	0
hsa-miR-4758-5p		0.00775795		1	0.00775795	0	hsa-miR-374c-5p		0.00930954		1	0.00930954	0
hsa-miR-1229-3p	0.00795545			1	0.00795545	0	hsa-miR-1246	0.00954654			1	0.00954654	0
hsa-miR-4651		0.00814585		1	0.00814585	0	hsa-miR-33a-3p		0.00969744		1	0.00969744	0
hsa-miR-6089		0.00853375		1	0.00853375	0	hsa-miR-151b		0.0100853		1	0.0100853	0
hsa-miR-3646	0.00875099			1	0.00875099	0	hsa-miR-128-3p		0.0104732		1	0.0104732	0
hsa-miR-8063		0.00892164		1	0.00892164	0	hsa-let-7c-3p		0.0108611		1	0.0108611	0
hsa-miR-4745-5p		0.00930954		1	0.00930954	0	hsa-miR-574-3p	0.0111376			1	0.0111376	0
hsa-miR-6793-3p		0.00969744		1	0.00969744	0	hsa-miR-5586-5p		0.011249		1	0.011249	0
hsa-miR-3121-3p		0.0100853		1	0.0100853	0	hsa-miR-211-5p		0.0116369		1	0.0116369	0
hsa-miR-133a-3p	0.0103421			1	0.0103421	0	hsa-miR-423-5p	0.0119332			1	0.0119332	0
hsa-miR-602		0.0104732		1	0.0104732	0	hsa-miR-3065-5p		0.0120248		1	0.0120248	0
hsa-miR-6749-5p		0.0108611		1	0.0108611	0	hsa-miR-331-3p		0.0124127		1	0.0124127	0
hsa-miR-639		0.011249		1	0.011249	0	hsa-miR-324-3p	0.0127287			1	0.0127287	0
hsa-miR-6776-5p		0.0116369		1	0.0116369	0	hsa-miR-4797-3p		0.0128006		1	0.0128006	0
hsa-miR-4734		0.0120248		1	0.0120248	0	hsa-miR-22-5p		0.0131885		1	0.0131885	0
hsa-miR-1909-3p		0.0124127		1	0.0124127	0	hsa-miR-320d	0.0135243			1	0.0135243	0
hsa-miR-1229-5p		0.0128006		1	0.0128006	0	hsa-miR-126-3p		0.0135764		1	0.0135764	0
hsa-miR-4507		0.0131885		1	0.0131885	0	hsa-miR-429		0.0139643		1	0.0139643	0
hsa-miR-1227-3p	0.0135243			1	0.0135243	0	hsa-miR-320e	0.0143198			1	0.0143198	0
hsa-miR-3185		0.0135764		1	0.0135764	0	hsa-miR-215-5p		0.0143522		1	0.0143522	0
hsa-miR-6752-5p		0.0139643		1	0.0139643	0	hsa-miR-362-3p		0.0147401		1	0.0147401	0
hsa-miR-625-5p	0.0143198			1	0.0143198	0	hsa-miR-4644		0.015128		1	0.015128	0
hsa-miR-6085		0.0143522		1	0.0143522	0	hsa-miR-148b-3p		0.0155159		1	0.0155159	0
hsa-miR-1231		0.0147401		1	0.0147401	0	hsa-miR-421		0.0159038		1	0.0159038	0
hsa-miR-1236-3p	0.0151154			1	0.0151154	0	hsa-miR-424-3p		0.0162917		1	0.0162917	0
hsa-miR-5689		0.015128		1	0.015128	0	hsa-miR-522-3p		0.0166796		1	0.0166796	0
hsa-miR-6754-5p		0.0155159		1	0.0155159	0	hsa-miR-18b-5p		0.0170675		1	0.0170675	1
hsa-miR-4433b-3p		0.0159038		1	0.0159038	0	hsa-miR-769-3p		0.0174554		1	0.0174554	1
hsa-miR-6891-5p		0.0162917		1	0.0162917	0	hsa-miR-887-3p		0.0178433		1	0.0178433	0
hsa-miR-4665-5p		0.0166796		1	0.0166796	0	hsa-miR-4643		0.0182312		1	0.0182312	0
hsa-miR-6724-5p		0.0170675		1	0.0170675	0	hsa-miR-510-5p		0.0186191		1	0.0186191	0
hsa-miR-3940-5p		0.0174554		1	0.0174554	0	hsa-let-7g-3p		0.019007		1	0.019007	0
hsa-miR-6075		0.0178433		1	0.0178433	0	hsa-miR-4322	0.0190931			1	0.0190931	1
hsa-miR-3188		0.0182312		1	0.0182312	0	hsa-miR-98-5p		0.0193949		1	0.0193949	0
hsa-miR-4741		0.0186191		1	0.0186191	0	hsa-miR-340-5p		0.0197828		1	0.0197828	0
hsa-miR-18b-5p	0.0190931			1	0.0190931	1	hsa-miR-320b	0.0198886			1	0.0198886	0
hsa-miR-3141		0.0197828		1	0.0197828	0	hsa-miR-660-5p		0.0201707		1	0.0201707	0
hsa-miR-2276-3p	0.0198886			1	0.0198886	1	hsa-miR-130b-5p		0.0205586		1	0.0205586	0
hsa-miR-1915-3p		0.0201707		1	0.0201707	0	hsa-miR-194-5p		0.0209465		1	0.0209465	0
hsa-miR-6756-5p		0.0209465		1	0.0209465	0	hsa-miR-4427		0.0213344		1	0.0213344	0
hsa-miR-4687-3p		0.0213344		1	0.0213344	0	hsa-miR-671-5p	0.0214797			1	0.0214797	0
hsa-miR-6803-5p		0.0221102		1	0.0221102	0	hsa-miR-382-3p		0.0217223		1	0.0217223	0
hsa-miR-601	0.0222753			1	0.0222753	0	hsa-miR-140-5p		0.0224981		1	0.0224981	0
hsa-miR-4649-5p		0.0224981		1	0.0224981	0	hsa-miR-556-3p		0.022886		1	0.022886	0
hsa-miR-7108-5p		0.022886		1	0.022886	0	hsa-miR-148a-3p		0.0232739		1	0.0232739	0
hsa-miR-1914-5p	0.0230708			1	0.0230708	0	hsa-miR-542-3p		0.0236618		1	0.0236618	0
hsa-miR-2392		0.0232739		1	0.0232739	0	hsa-miR-8088		0.0240497		1	0.0240497	0
hsa-miR-552-3p		0.0236618		1	0.0236618	0	hsa-miR-4659a-5p		0.0244375		1	0.0244375	0
hsa-miR-3194-5p	0.0238663			1	0.0238663	0	hsa-miR-200a-3p		0.0252133		1	0.0252133	0
hsa-miR-1225-5p		0.0240497		1	0.0240497	0	hsa-miR-513b-5p		0.0256012		1	0.0256012	0
hsa-miR-4674		0.0244375		1	0.0244375	0	hsa-miR-146b-5p		0.0259891		1	0.0259891	0
hsa-miR-6794-5p		0.0248254		1	0.0248254	0	hsa-miR-101-3p		0.026377		1	0.026377	0
hsa-miR-6765-5p		0.0252133		1	0.0252133	0	hsa-miR-6744-3p		0.0267649		1	0.0267649	0
hsa-miR-134-5p	0.0254574			1	0.0254574	0	hsa-miR-508-5p		0.0271528		1	0.0271528	0
hsa-miR-762		0.0259891		1	0.0259891	0	hsa-miR-1301-3p		0.0275407		1	0.0275407	0
hsa-miR-3195	0.026253			1	0.026253	0	hsa-miR-192-5p		0.0279286		1	0.0279286	0
hsa-miR-6729-5p		0.026377		1	0.026377	0	hsa-miR-374a-5p		0.0283165		1	0.0283165	0
hsa-miR-5001-5p		0.0267649		1	0.0267649	0	hsa-miR-448		0.0287044		1	0.0287044	0
hsa-miR-3138	0.0270485			1	0.0270485	0	hsa-miR-99a-3p		0.0290923		1	0.0290923	0
hsa-miR-6125		0.0271528		1	0.0271528	0	hsa-miR-503-5p		0.0294802		1	0.0294802	0
hsa-miR-4707-5p		0.0275407		1	0.0275407	0	hsa-miR-31-3p		0.0298681		1	0.0298681	0
hsa-miR-6088		0.0279286		1	0.0279286	0	hsa-miR-519d-3p		0.030256		1	0.030256	0
hsa-miR-6821-5p		0.0283165		1	0.0283165	0	hsa-miR-204-5p		0.0306439		1	0.0306439	0
hsa-miR-23a-5p		0.0290923		1	0.0290923	0	hsa-miR-3658		0.0310318		1	0.0310318	0
hsa-miR-1249-3p	0.0294352			1	0.0294352	0	hsa-miR-130a-3p		0.0314197		1	0.0314197	0
hsa-miR-4281		0.0294802		1	0.0294802	0	hsa-miR-29c-3p		0.0318076		1	0.0318076	0
hsa-miR-6510-5p		0.0298681		1	0.0298681	0	hsa-miR-548a-3p		0.0321955		1	0.0321955	0
hsa-miR-659-3p	0.0302307			1	0.0302307	0	hsa-miR-30c-5p		0.0325834		1	0.0325834	0
hsa-miR-6791-5p		0.030256		1	0.030256	0	hsa-miR-196a-5p		0.0329713		1	0.0329713	0
hsa-miR-4466		0.0306439		1	0.0306439	0	hsa-miR-6853-3p		0.0333592		1	0.0333592	0
hsa-miR-3911	0.0310263			1	0.0310263	0	hsa-miR-485-5p		0.0337471		1	0.0337471	0
hsa-miR-1207-5p		0.0310318		1	0.0310318	0	hsa-miR-891a-5p		0.034135		1	0.034135	0
hsa-miR-6727-5p		0.0314197		1	0.0314197	0	hsa-miR-10b-5p		0.0345229		1	0.0345229	0
hsa-miR-1227-5p		0.0318076		1	0.0318076	0	hsa-miR-383-3p		0.0349108		1	0.0349108	0
hsa-miR-634	0.0318218			1	0.0318218	0	hsa-miR-125b-2-3p		0.0352987		1	0.0352987	0
hsa-miR-8069		0.0321955		1	0.0321955	0	hsa-miR-3926		0.0360745		1	0.0360745	0
hsa-miR-7106-5p		0.0325834		1	0.0325834	0	hsa-miR-363-5p		0.0364624		1	0.0364624	0
hsa-miR-718	0.0326173			1	0.0326173	0	hsa-miR-3977		0.0368503		1	0.0368503	0
hsa-miR-1268b		0.0329713		1	0.0329713	0	hsa-miR-542-5p		0.0372382		1	0.0372382	0
hsa-miR-4478		0.0333592		1	0.0333592	0	hsa-miR-4309		0.0376261		1	0.0376261	0
hsa-miR-3180-5p	0.0334129			1	0.0334129	0	hsa-miR-489-3p		0.038014		1	0.038014	0
hsa-miR-6751-3p		0.0337471		1	0.0337471	0	hsa-miR-6719-3p		0.0384019		1	0.0384019	0
hsa-miR-6858-5p		0.034135		1	0.034135	0	hsa-miR-99b-3p		0.0387898		1	0.0387898	0
hsa-miR-1267	0.0342084			1	0.0342084	0	hsa-miR-511-3p		0.0391777		1	0.0391777	0
hsa-miR-6716-5p		0.0345229		1	0.0345229	0	hsa-miR-875-3p		0.0395656		1	0.0395656	0
hsa-miR-6816-5p		0.0349108		1	0.0349108	0	hsa-miR-424-5p		0.0399535		1	0.0399535	0
hsa-miR-575	0.035004			1	0.035004	0	hsa-miR-195-5p		0.0407292		1	0.0407292	0
hsa-miR-4763-3p		0.0352987		1	0.0352987	0	hsa-miR-219b-5p		0.0411171		1	0.0411171	0
hsa-miR-1237-5p		0.0356866		1	0.0356866	0	hsa-let-7g-5p		0.041505		1	0.041505	0
hsa-miR-630	0.0357995			1	0.0357995	0	hsa-miR-20a-5p		0.0418929		1	0.0418929	0
hsa-miR-1268a		0.0360745		1	0.0360745	0	hsa-miR-515-3p		0.0422808		1	0.0422808	0
hsa-miR-4433a-3p		0.0364624		1	0.0364624	0	hsa-miR-28-5p		0.0426687		1	0.0426687	0
hsa-miR-3613-3p	0.0365951			1	0.0365951	0	hsa-miR-1180-3p		0.0430566		1	0.0430566	0
hsa-miR-4783-3p		0.0368503		1	0.0368503	0	hsa-miR-151a-5p		0.0434445		1	0.0434445	0
hsa-miR-5787		0.0372382		1	0.0372382	0	hsa-miR-181b-5p		0.0438324		1	0.0438324	0
hsa-miR-4270		0.0376261		1	0.0376261	0	hsa-miR-1270		0.0442203		1	0.0442203	0
hsa-miR-1469		0.038014		1	0.038014	0	hsa-miR-1271-5p		0.0446082		1	0.0446082	0
hsa-miR-3960		0.0384019		1	0.0384019	0	hsa-let-7f-5p		0.0449961		1	0.0449961	0
hsa-miR-7107-5p		0.0387898		1	0.0387898	0	hsa-miR-708-5p		0.045384		1	0.045384	0
hsa-miR-548ad-3p		0.0391777		1	0.0391777	0	hsa-miR-4448		0.0457719		1	0.0457719	0
hsa-miR-6861-5p		0.0395656		1	0.0395656	0	hsa-miR-30b-5p		0.0461598		1	0.0461598	0
hsa-miR-4695-5p		0.0399535		1	0.0399535	0	hsa-miR-450b-3p		0.0465477		1	0.0465477	0
hsa-miR-6763-5p		0.0403413		1	0.0403413	0	hsa-miR-302b-3p		0.0469356		1	0.0469356	0
hsa-miR-3180		0.0411171		1	0.0411171	0	hsa-miR-7-5p		0.0473235		1	0.0473235	0
hsa-miR-4253		0.041505		1	0.041505	0	hsa-miR-628-3p		0.0480993		1	0.0480993	0
hsa-miR-6786-5p		0.0418929		1	0.0418929	0	hsa-miR-339-5p		0.0484872		1	0.0484872	0
hsa-miR-8089		0.0422808		1	0.0422808	0	hsa-miR-3681-3p		0.0488751		1	0.0488751	0
hsa-miR-6798-5p		0.0426687		1	0.0426687	0	hsa-let-7e-5p		0.049263		1	0.049263	0
hsa-miR-6805-5p		0.0430566		1	0.0430566	0	hsa-miR-30a-3p		0.0496509		1	0.0496509	0
hsa-miR-6784-5p		0.0434445		1	0.0434445	0	hsa-miR-4474-5p		0.0500388		1	0.0500388	0
hsa-miR-5196-5p		0.0438324		1	0.0438324	0	hsa-miR-34a-3p		0.0504267		1	0.0504267	0
hsa-miR-6869-5p		0.0442203		1	0.0442203	0	hsa-miR-3613-5p		0.0508146		1	0.0508146	0
hsa-miR-1323		0.0446082		1	0.0446082	0	hsa-miR-7162-3p		0.0512025		1	0.0512025	0
hsa-miR-6800-5p		0.0449961		1	0.0449961	0	hsa-miR-509-5p		0.0515904		1	0.0515904	0
hsa-miR-4766-3p		0.045384		1	0.045384	0	hsa-miR-514b-5p		0.0519783		1	0.0519783	0
hsa-miR-4769-5p		0.0457719		1	0.0457719	0	hsa-miR-491-3p		0.0523662		1	0.0523662	0
hsa-miR-197-5p		0.0461598		1	0.0461598	0	hsa-miR-8055		0.0527541		1	0.0527541	0
hsa-miR-6789-5p		0.0465477		1	0.0465477	0	hsa-miR-146a-5p		0.053142		1	0.053142	0
hsa-miR-6831-3p		0.0469356		1	0.0469356	0	hsa-miR-29b-2-5p		0.0535299		1	0.0535299	0
hsa-miR-6840-3p		0.0473235		1	0.0473235	0	hsa-miR-500b-3p		0.0539178		1	0.0539178	0
hsa-miR-150-3p		0.0477114		1	0.0477114	0	hsa-miR-4773		0.0543057		1	0.0543057	0
hsa-miR-149-3p		0.0480993		1	0.0480993	0	hsa-miR-363-3p		0.0546936		1	0.0546936	0
hsa-miR-1228-5p		0.0484872		1	0.0484872	0	hsa-miR-3200-3p		0.0550815		1	0.0550815	0
hsa-miR-3621		0.0488751		1	0.0488751	0	hsa-miR-361-5p		0.0554694		1	0.0554694	0
hsa-miR-1913		0.049263		1	0.049263	0	hsa-miR-1973		0.0558573		1	0.0558573	0
hsa-miR-5188		0.0500388		1	0.0500388	0	hsa-miR-2276-3p		0.0562452		1	0.0562452	1
hsa-miR-4463		0.0504267		1	0.0504267	0	hsa-miR-1264		0.056633		1	0.056633	0
hsa-miR-6850-5p		0.0508146		1	0.0508146	0	hsa-miR-26a-5p		0.0570209		1	0.0570209	0
hsa-miR-3196		0.0512025		1	0.0512025	0	hsa-miR-374b-5p		0.0574088		1	0.0574088	0
hsa-miR-4690-3p		0.0519783		1	0.0519783	0	hsa-miR-23c		0.0585725		1	0.0585725	0
hsa-miR-3162-5p		0.0523662		1	0.0523662	0	hsa-miR-548av-3p		0.0589604		1	0.0589604	0
hsa-miR-4725-3p		0.0527541		1	0.0527541	0	hsa-miR-6516-5p		0.0593483		1	0.0593483	0
hsa-miR-940		0.053142		1	0.053142	0	hsa-miR-4693-3p		0.0597362		1	0.0597362	0
hsa-miR-4505		0.0539178		1	0.0539178	0	hsa-miR-614		0.0601241		1	0.0601241	0
hsa-miR-3179		0.0543057		1	0.0543057	0	hsa-miR-26b-3p		0.060512		1	0.060512	0
hsa-miR-5572		0.0546936		1	0.0546936	0	hsa-miR-1307-5p		0.0608999		1	0.0608999	0
hsa-miR-7150		0.0550815		1	0.0550815	0	hsa-miR-132-3p		0.0612878		1	0.0612878	0
hsa-miR-3620-5p		0.0554694		1	0.0554694	0	hsa-miR-509-3p		0.0620636		1	0.0620636	0
hsa-miR-7851-3p		0.0558573		1	0.0558573	0	hsa-miR-1244		0.0624515		1	0.0624515	0
hsa-miR-92a-1-5p		0.0562452		1	0.0562452	0	hsa-miR-23b-3p		0.0628394		1	0.0628394	0
hsa-miR-6133		0.056633		1	0.056633	0	hsa-miR-6839-3p		0.0632273		1	0.0632273	0
hsa-miR-328-5p		0.0570209		1	0.0570209	0	hsa-miR-1199-3p		0.0636152		1	0.0636152	0
hsa-miR-7845-5p		0.0577967		1	0.0577967	0	hsa-miR-4297		0.0640031		1	0.0640031	0
hsa-miR-4516		0.0581846		1	0.0581846	0	hsa-miR-514a-5p		0.064391		1	0.064391	0
hsa-miR-4534		0.0585725		1	0.0585725	0	hsa-miR-376c-3p		0.0647789		1	0.0647789	0
hsa-miR-1587		0.0589604		1	0.0589604	0	hsa-miR-15a-5p		0.0651668		1	0.0651668	0
hsa-miR-135a-3p		0.0593483		1	0.0593483	0	hsa-miR-4639-3p		0.0655547		1	0.0655547	0
hsa-miR-1343-5p		0.0597362		1	0.0597362	0	hsa-miR-16-5p		0.0659426		1	0.0659426	0
hsa-miR-4690-5p		0.0601241		1	0.0601241	0	hsa-miR-148a-5p		0.0663305		1	0.0663305	0
hsa-miR-6130		0.060512		1	0.060512	0	hsa-miR-543		0.0667184		1	0.0667184	0
hsa-miR-6857-3p		0.0608999		1	0.0608999	0	hsa-miR-100-5p		0.0671063		1	0.0671063	0
hsa-miR-6799-5p		0.0612878		1	0.0612878	0	hsa-miR-502-5p		0.0674942		1	0.0674942	0
hsa-miR-1236-5p		0.0616757		1	0.0616757	0	hsa-miR-1296-3p		0.0678821		1	0.0678821	0
hsa-miR-4274		0.0620636		1	0.0620636	0	hsa-let-7d-5p		0.06827		1	0.06827	0
hsa-miR-3187-3p		0.0624515		1	0.0624515	0	hsa-miR-29a-3p		0.0686579		1	0.0686579	0
hsa-miR-6715b-3p		0.0628394		1	0.0628394	0	hsa-miR-501-3p		0.0690458		1	0.0690458	0
hsa-miR-4486		0.0632273		1	0.0632273	0	hsa-miR-20b-5p		0.0694337		1	0.0694337	0
hsa-miR-6508-5p		0.0636152		1	0.0636152	0	hsa-miR-548y		0.0698216		1	0.0698216	0
hsa-miR-1275		0.0640031		1	0.0640031	0	hsa-miR-3605-5p		0.0702095		1	0.0702095	0
hsa-miR-6792-5p		0.064391		1	0.064391	0	hsa-miR-5699-5p		0.0705974		1	0.0705974	0
hsa-miR-1238-5p		0.0647789		1	0.0647789	0	hsa-miR-7153-3p		0.0709853		1	0.0709853	0
hsa-miR-4673		0.0651668		1	0.0651668	0	hsa-miR-6828-3p		0.0713732		1	0.0713732	0
hsa-miR-6069		0.0655547		1	0.0655547	0	hsa-miR-27b-3p		0.0717611		1	0.0717611	0
hsa-miR-139-3p		0.0659426		1	0.0659426	0	hsa-miR-505-3p		0.072149		1	0.072149	0
hsa-miR-4632-5p		0.0663305		1	0.0663305	0	hsa-miR-1322		0.0725369		1	0.0725369	0
hsa-miR-6779-5p		0.0667184		1	0.0667184	0	hsa-miR-324-5p		0.0729247		1	0.0729247	0
hsa-miR-4497		0.0671063		1	0.0671063	0	hsa-let-7a-5p		0.0733126		1	0.0733126	0
hsa-miR-6848-5p		0.0674942		1	0.0674942	0	hsa-miR-4328		0.0737005		1	0.0737005	0
hsa-miR-4530		0.0678821		1	0.0678821	0	hsa-miR-499a-5p		0.0740884		1	0.0740884	0
hsa-miR-4731-3p		0.06827		1	0.06827	0	hsa-miR-28-3p		0.0744763		1	0.0744763	0
hsa-miR-539-3p		0.0686579		1	0.0686579	0	hsa-miR-2276-5p		0.0752521		1	0.0752521	0
hsa-miR-8072		0.0690458		1	0.0690458	0	hsa-miR-3973		0.0760279		1	0.0760279	0
hsa-miR-6855-5p		0.0694337		1	0.0694337	0	hsa-miR-4762-5p		0.0764158		1	0.0764158	0
hsa-miR-5195-3p		0.0698216		1	0.0698216	0	hsa-miR-6734-3p		0.0768037		1	0.0768037	0
hsa-miR-6846-3p		0.0702095		1	0.0702095	0	hsa-miR-8054		0.0771916		1	0.0771916	0
hsa-miR-490-5p		0.0709853		1	0.0709853	0	hsa-miR-125a-5p		0.0775795		1	0.0775795	0
hsa-miR-4634		0.0717611		1	0.0717611	0	hsa-miR-142-5p		0.0779674		1	0.0779674	0
hsa-miR-3151-5p		0.072149		1	0.072149	0	hsa-miR-532-5p		0.0783553		1	0.0783553	0
hsa-miR-4706		0.0725369		1	0.0725369	0	hsa-miR-3159		0.0787432		1	0.0787432	0
hsa-miR-4751		0.0729247		1	0.0729247	0	hsa-miR-769-5p		0.0791311		1	0.0791311	0
hsa-miR-4488		0.0733126		1	0.0733126	0	hsa-miR-34c-3p		0.079519		1	0.079519	0
hsa-miR-6875-5p		0.0737005		1	0.0737005	0	hsa-miR-4664-5p		0.0799069		1	0.0799069	0
hsa-miR-6881-5p		0.0740884		1	0.0740884	0	hsa-miR-18a-5p		0.0802948		1	0.0802948	0
hsa-miR-6771-5p		0.0744763		1	0.0744763	0	hsa-miR-6766-3p		0.0806827		1	0.0806827	0
hsa-miR-3648		0.0748642		1	0.0748642	0	hsa-miR-138-5p		0.0810706		1	0.0810706	0
hsa-miR-6165		0.0752521		1	0.0752521	0	hsa-miR-7154-3p		0.0814585		1	0.0814585	0
hsa-miR-3928-5p		0.07564		1	0.07564	0	hsa-miR-660-3p		0.0822343		1	0.0822343	0
hsa-miR-6742-5p		0.0760279		1	0.0760279	0	hsa-miR-382-5p		0.0830101		1	0.0830101	0
hsa-miR-6769b-5p		0.0764158		1	0.0764158	0	hsa-miR-520e-3p		0.083398		1	0.083398	0
hsa-miR-3652		0.0768037		1	0.0768037	0	hsa-miR-4756-3p		0.0837859		1	0.0837859	0
hsa-miR-4787-5p		0.0775795		1	0.0775795	0	hsa-miR-1251-5p		0.0841738		1	0.0841738	0
hsa-miR-1908-5p		0.0779674		1	0.0779674	0	hsa-miR-548aw		0.0845617		1	0.0845617	0
hsa-miR-548f-3p		0.0783553		1	0.0783553	0	hsa-miR-2682-3p		0.0849496		1	0.0849496	0
hsa-miR-4482-5p		0.0787432		1	0.0787432	0	hsa-miR-155-5p		0.0853375		1	0.0853375	0
hsa-miR-6880-3p		0.0791311		1	0.0791311	0	hsa-miR-152-3p		0.0857254		1	0.0857254	0
hsa-miR-3190-3p		0.079519		1	0.079519	0	hsa-miR-5704		0.0861133		1	0.0861133	0
hsa-miR-6796-5p		0.0799069		1	0.0799069	0	hsa-miR-2115-3p		0.0868891		1	0.0868891	0
hsa-miR-6827-5p		0.0802948		1	0.0802948	0	hsa-miR-107		0.087277		1	0.087277	0
hsa-miR-6775-5p		0.0806827		1	0.0806827	0	hsa-miR-4648		0.0876649		1	0.0876649	0
hsa-miR-1292-3p		0.0810706		1	0.0810706	0	hsa-miR-6755-5p		0.0880528		1	0.0880528	0
hsa-miR-6870-5p		0.0814585		1	0.0814585	0	hsa-miR-128-1-5p		0.0884407		1	0.0884407	0
hsa-miR-933		0.0818464		1	0.0818464	0
hsa-miR-4778-3p		0.0822343		1	0.0822343	0
hsa-miR-92b-5p		0.0830101		1	0.0830101	0
hsa-miR-1233-5p		0.083398		1	0.083398	0
hsa-miR-1224-5p		0.0837859		1	0.0837859	0
hsa-miR-411-5p		0.0841738		1	0.0841738	0
hsa-miR-3162-3p		0.0845617		1	0.0845617	0
hsa-miR-6849-5p		0.0849496		1	0.0849496	0
hsa-miR-3936		0.0857254		1	0.0857254	0
hsa-miR-513b-3p		0.0861133		1	0.0861133	0
hsa-miR-6800-3p		0.0865012		1	0.0865012	0
hsa-miR-4496		0.0868891		1	0.0868891	0
hsa-miR-576-5p		0.087277		1	0.087277	0
hsa-miR-4689		0.0876649		1	0.0876649	0
hsa-miR-6499-3p		0.0880528		1	0.0880528	0
hsa-miR-6726-5p		0.0884407		1	0.0884407	0
hsa-miR-6781-5p		0.0888285		1	0.0888285	0
hsa-miR-517c-3p		0.0892164		1	0.0892164	0
hsa-miR-6813-3p		0.0896043		1	0.0896043	0
hsa-miR-3181		0.0899922		1	0.0899922	0
hsa-miR-6892-3p		0.0903801		1	0.0903801	0
hsa-miR-7110-5p		0.0911559		1	0.0911559	0
hsa-miR-4529-5p		0.0915438		1	0.0915438	0
hsa-miR-6782-5p		0.0919317		1	0.0919317	0
hsa-miR-4312		0.0923196		1	0.0923196	0
hsa-miR-1297		0.0927075		1	0.0927075	0
hsa-miR-6780a-5p		0.0930954		1	0.0930954	0
hsa-miR-5692b		0.0934833		1	0.0934833	0
hsa-miR-1908-3p		0.0938712		1	0.0938712	0
hsa-miR-3942-3p		0.0942591		1	0.0942591	0
hsa-miR-1225-3p		0.094647		1	0.094647	0
hsa-miR-520h		0.0950349		1	0.0950349	0
hsa-miR-1237-3p		0.0954228		1	0.0954228	0
hsa-miR-1238-3p		0.0958107		1	0.0958107	0
hsa-miR-6757-5p		0.0961986		1	0.0961986	0
hsa-miR-6732-5p		0.0965865		1	0.0965865	0
hsa-miR-4711-5p		0.0969744		1	0.0969744	0
hsa-miR-4318		0.0973623		1	0.0973623	0
hsa-miR-504-3p		0.0981381		1	0.0981381	0
hsa-miR-3619-5p		0.098526		1	0.098526	0
hsa-miR-3125		0.0989139		1	0.0989139	0
hsa-miR-7111-5p		0.0993018		1	0.0993018	0
hsa-miR-6865-3p		0.0996897		1	0.0996897	0
hsa-miR-1226-5p		0.100078		1	0.100078	0
hsa-miR-611		0.100465		1	0.100465	0
hsa-miR-6805-3p		0.100853		1	0.100853	0
hsa-miR-6886-5p		0.101241		1	0.101241	0
hsa-miR-6761-3p		0.101629		1	0.101629	0
hsa-miR-519e-5p		0.102017		1	0.102017	0
hsa-miR-8062		0.102405		1	0.102405	0
hsa-miR-4518		0.102793		1	0.102793	0
hsa-miR-4451		0.103181		1	0.103181	0
hsa-miR-1909-5p		0.103569		1	0.103569	0
hsa-miR-1181		0.103957		1	0.103957	0
hsa-miR-4664-3p		0.104344		1	0.104344	0
hsa-miR-4784		0.104732		1	0.104732	0
hsa-miR-548ab		0.10512		1	0.10512	0
hsa-miR-4527		0.105508		1	0.105508	0
hsa-miR-4327		0.105896		1	0.105896	0
hsa-miR-3675-3p		0.106284		1	0.106284	0
hsa-miR-6787-5p		0.106672		1	0.106672	0
hsa-miR-4484		0.10706		1	0.10706	0
hsa-miR-5011-3p		0.107448		1	0.107448	0
hsa-miR-376a-2-5p		0.107836		1	0.107836	0
hsa-miR-7704		0.108223		1	0.108223	0
hsa-miR-548t-5p		0.108611		1	0.108611	0
hsa-miR-3167		0.108999		1	0.108999	0
hsa-miR-6499-5p		0.109387		1	0.109387	0
hsa-miR-4467		0.109775		1	0.109775	0
hsa-miR-7156-3p		0.110163		1	0.110163	0
hsa-miR-6891-3p		0.110551		1	0.110551	0
hsa-miR-5691		0.110939		1	0.110939	0
hsa-miR-7152-3p		0.111327		1	0.111327	0
hsa-miR-5583-3p		0.111715		1	0.111715	0
hsa-miR-4655-5p		0.112102		1	0.112102	0
hsa-miR-3684		0.11249		1	0.11249	0
hsa-miR-345-3p		0.112878		1	0.112878	0
hsa-miR-8067		0.113266		1	0.113266	0
hsa-miR-4777-3p		0.113654		1	0.113654	0
hsa-miR-3186-5p		0.114042		1	0.114042	0

[truncated: 1 more sheets: FSGS kidney]
