# Supplementary material for: A Systematic Review and Meta-Analysis of microRNA Profiling Studies in Chronic Kidney Diseases
Source: Noncoding RNA. 2024 May 3;10(3):30. doi: 10.3390/ncrna10030030 (PMC11130806; doi:10.3390/ncrna10030030)
Supplement: Supplementary file 1 [file ncrna-10-00030-s001.zip › Supplementary File S3.xlsx]

## Sheet: murine UUO_VC
Table S13. Up- and down-regulated miRNAs were reported in murine model of diabetic kidney disease
Down-regulated miRNAs											Up-regulated miRNAs
miRNA	Gu2017	Y.Zhang2015	Long2010	Zhang2009	Ishii2021A	Ishii2021B	Zhu2016	Studies with the same direction	Average ranking score	Studies with opposite direction	miRNA	Gu2017	Y.Zhang2015	Zhang2009	Ishii2021B	Zhu2016	Studies with the same direction	Average ranking score	Studies with opposite direction
mmu-miR-20a-5p	0.00939457		0.029985		0.0143541	0.0212653		4	0.0187497	0	mmu-miR-204-5p			0.00352113	0.00850611		2	0.00601362	0
mmu-miR-709		0.00592718	0.0644678			0.00425306	0.00328407	4	0.019483	0	mmu-let-7k	0.00104384					1	0.00104384	0
mmu-miR-223-3p	0.00835073				0.00903775	0.00372142		3	0.00703663	0	mmu-miR-345-3p	0.00208768					1	0.00208768	0
mmu-miR-200c-3p		0.0042337	0.0674663				0.00164204	3	0.0244473	0	mmu-miR-377		0.00084674				1	0.00084674	0
											mmu-miR-166		0.00169348				1	0.00169348	0
											mmu-miR-17		0.00254022				1	0.00254022	0
											mmu-miR-216a		0.00338696				1	0.00338696	0
											mmu-miR-29c		0.0042337				1	0.0042337	0
											mmu-miR-192		0.00508044				1	0.00508044	0
											mmu-miR-196a		0.00592718				1	0.00592718	0
											mmu-miR-98		0.00677392				1	0.00677392	0
											mmu-miR-467b-3p			0.00176056			1	0.00176056	0
											mmu-miR-467a-3p			0.00528169			1	0.00528169	0
											mmu-miR-122-5p				0.000531632		1	0.000531632	0
											mmu-miR-504-3p				0.00106326		1	0.00106326	0
											mmu-miR-7682-3p				0.0015949		1	0.0015949	0
											mmu-miR-7218-5p				0.00212653		1	0.00212653	0
											mmu-miR-6401				0.00265816		1	0.00265816	1
											mmu-miR-129b-5p				0.00318979		1	0.00318979	1
											mmu-miR-3070-2-3p				0.00372142		1	0.00372142	0
											mmu-miR-6904-5p				0.00425306		1	0.00425306	0
											mmu-miR-6918-5p				0.00478469		1	0.00478469	0
											mmu-miR-6975-5p				0.00531632		1	0.00531632	0
											mmu-miR-6980-5p				0.00584795		1	0.00584795	1
											mmu-miR-7080-5p				0.00637959		1	0.00637959	0
											mmu-miR-3102-5p				0.00691122		1	0.00691122	0
											mmu-miR-3960				0.00744285		1	0.00744285	0
											mmu-miR-30c-1-3p				0.00797448		1	0.00797448	0
											mmu-miR-874-3p				0.00903775		1	0.00903775	2
											mmu-miR-5126				0.00956938		1	0.00956938	0
											mmu-miR-8110				0.010101		1	0.010101	0
											mmu-miR-24-1-5p				0.0106326		1	0.0106326	0
											mmu-miR-34a-5p				0.0111643		1	0.0111643	1
											mmu-miR-129-1-3p				0.0116959		1	0.0116959	1
											mmu-miR-28c				0.0122275		1	0.0122275	0
											mmu-miR-335-5p				0.0127592		1	0.0127592	0
											mmu-miR-455-3p				0.0132908		1	0.0132908	0
											mmu-miR-455-5p				0.0138224		1	0.0138224	1
											mmu-miR-28a-5p				0.0143541		1	0.0143541	0
											mmu-miR-139-5p				0.0148857		1	0.0148857	0
											mmu-miR-500-3p				0.0154173		1	0.0154173	0
											mmu-miR-322-5p				0.015949		1	0.015949	0
											mmu-miR-148b-3p				0.0164806		1	0.0164806	0
											mmu-miR-23b-3p				0.0170122		1	0.0170122	1
											mmu-miR-181b-5p				0.0175439		1	0.0175439	1
											mmu-miR-30d-5p				0.0180755		1	0.0180755	1
											mmu-miR-450a-5p				0.0186071		1	0.0186071	0
											mmu-miR-340-5p				0.0191388		1	0.0191388	0
											mmu-miR-140-5p				0.0196704		1	0.0196704	0
											mmu-miR-30c-5p				0.020202		1	0.020202	0
											mmu-miR-652-3p				0.0207337		1	0.0207337	1
											mmu-miR-181a-5p				0.0212653		1	0.0212653	1
											mmu-miR-27b-3p				0.0217969		1	0.0217969	1
											mmu-miR-190a-5p				0.0223285		1	0.0223285	0
											mmu-miR-331-3p				0.0228602		1	0.0228602	0
											mmu-miR-30b-5p				0.0233918		1	0.0233918	1
											mmu-miR-146a-5p					0.00164204	1	0.00164204	2
											mmu-miR-574-3p					0.00328407	1	0.00328407	0
											mmu-miR-297a-5p					0.00492611	1	0.00492611	0
											mmu-miR-181d-5p					0.00656814	1	0.00656814	0
											mmu-miR-669b-5p					0.00821018	1	0.00821018	0
											mmu-miR-615-3p					0.00985222	1	0.00985222	0
											mmu-miR-133a-3p					0.0114943	1	0.0114943	0
											mmu-miR-669c-5p					0.0131363	1	0.0131363	0
											mmu-miR-503-5p					0.0147783	1	0.0147783	0
											mmu-miR-29b-3p					0.0164204	1	0.0164204	0

## Sheet: murine DKD_VC
Table S14. Up- and down-regulated miRNAs were reported in murine model of diabetic kidney disease
Down-regulated miRNAs								Up-regulated miRNAs
miRNA	Chung2010	Glowacki2013	Bijkerk2016	Yanai2020	Studies with the same direction	Average ranking score	Studies with opposite direction		Chau2012	Chung2010	Glowacki2013	Bijkerk2016	Morizone2014	Yanai2020	Studies with the same direction	Average ranking score	Studies with opposite direction
mmu-miR-429-3p	0.0186667	0.037037	0.0416667	0.0467836	4	0.0360385	0	mmu-miR-21a-5p	0.00797607	0.04	0.0176367	0.0208333		0.00478469	5	0.0182462	0
mmu-miR-30e-5p	0.0533333	0.0229277	0.0208333	0.00478469	4	0.0254698	0	mmu-miR-214-3p	0.000997009		0.00705467	0.0182292		0.00584795	4	0.0080322	0
mmu-miR-29b-3p	0.0133333	0.0335097		0.0186071	3	0.0218167	0	mmu-miR-146a-5p	0.00498504		0.00352734	0.0260417		0.0489102	4	0.0208661	0
mmu-miR-200a-3p	0.024	0.0458554		0.020202	3	0.0300191	0	mmu-miR-223-3p	0.00598205		0.00881834	0.00520833		0.0116959	4	0.00792616	0
mmu-miR-200b-3p	0.032	0.0599647		0.0414673	3	0.0444773	0	mmu-miR-342-3p	0.00897308		0.0123457	0.0078125		0.00744285	4	0.00914353	0
mmu-miR-383-5p	0.0346667		0.0182292	0.281765	3	0.111554	0	mmu-miR-142a-3p	0.0119641		0.0229277	0.0390625		0.0127592	4	0.0216784	0
mmu-miR-29c-3p	0.04	0.00705467		0.0143541	3	0.0204696	0	mmu-miR-199a-5p	0.0159521		0.00176367	0.0234375		0.010101	4	0.0128136	0
mmu-miR-107-3p		0.00529101	0.046875	0.0255183	3	0.0258948	0	mmu-miR-132-3p	0.00398804			0.015625		0.00637959	3	0.00866421	0
mmu-miR-365-3p		0.010582	0.015625	0.0180755	3	0.0147608	0	mmu-miR-199b-5p	0.0129611		0.0141093			0.0132908	3	0.0134538	0
mmu-miR-218-5p		0.0352734	0.0520833	0.0148857	3	0.0340808	0	mmu-miR-199a-3p	0.0139581		0.010582			0.0106326	3	0.0117243	0
mmu-miR-221-3p		0.047619	0.00260417	0.76555	3	0.271924	0	mmu-miR-350-3p	0.0149551		0.021164			0.0207337	3	0.0189509	0
mmu-miR-192-5p		0.0529101	0.0442708	0.0281765	3	0.0417858	0	mmu-miR-379-5p		0.0506667			0.0271132	0.0627326	3	0.0468375	0
mmu-miR-455-3p		0.0634921	0.00520833	0.0334928	3	0.0340644	0	mmu-miR-467e-5p		0.0853333			0.00797448	0.0122275	3	0.0351785	0
								mmu-miR-146b-5p				0.00260417	0.0637959	0.00850611	3	0.0249687	0
								mmu-miR-183-5p	0.00199402					0.0191388	2	0.0105664	0
								mmu-miR-18a-5p	0.00299103					0.0111643	2	0.00707765	0
								mmu-miR-93-5p	0.00697906					0.030303	2	0.018641	0
								mmu-miR-674-3p	0.00997009					0.020202	2	0.0150861	0
								mmu-miR-99b-5p	0.0109671					0.0318979	2	0.0214325	0
								mmu-miR-19a-3p	0.0179462					0.0223285	2	0.0201374	0
								mmu-miR-15b-5p	0.0189432					0.0276449	2	0.023294	0
								mmu-miR-20a-5p	0.0199402					0.0233918	2	0.021666	0
								mmu-miR-106b-5p	0.0209372					0.0292398	2	0.0250885	0
								mmu-miR-25-3p	0.0229312					0.0297714	2	0.0263513	0
								mmu-miR-92a-3p	0.0239282					0.0520999	2	0.0380141	0
								mmu-miR-542-3p		0.016			0.046252		2	0.031126	1
								mmu-miR-433-3p		0.0293333		0.0364583			2	0.0328958	1
								mmu-miR-511-5p		0.032		0.0572917			2	0.0446458	1
								mmu-miR-680		0.0346667				0.0457204	2	0.0401935	0
								mmu-miR-294-3p		0.0426667		0.0338542			2	0.0382604	1
								mmu-miR-129-2-3p		0.0666667			0.0478469		2	0.0572568	1
								mmu-miR-467c-5p		0.072			0.0207337		2	0.0463668	0
								mmu-miR-205-5p			0.015873		0.00956938		2	0.0127212	0
								mmu-miR-148a-3p			0.0194004	0.0416667			2	0.0305335	0
								mmu-miR-150-5p				0.0104167		0.0643275	2	0.0373721	0
								mmu-miR-134-5p				0.03125		0.066454	2	0.048852	0
								mmu-miR-142a-5p					0.0015949	0.015949	2	0.00877193	0
								mmu-miR-467a-3p					0.00637959	0.00531632	2	0.00584795	0
								mmu-miR-31-3p					0.0127592	0.0680489	2	0.040404	0
								mmu-miR-17-5p					0.0143541	0.0308347	2	0.0225944	0
								mmu-miR-181a-1-3p					0.015949	0.0648591	2	0.040404	0
								mmu-miR-127-3p					0.0175439	0.0186071	2	0.0180755	0
								mmu-miR-342-5p					0.0223285	0.00372142	2	0.013025	0
								mmu-miR-141-5p					0.0287081	0.0138224	2	0.0212653	0
								mmu-miR-214-5p					0.030303	0.0015949	2	0.015949	0
								mmu-miR-15b-3p					0.0334928	0.00903775	2	0.0212653	0
								mmu-miR-669l-5p					0.0414673	0.00265816	2	0.0220627	0
								mmu-miR-501-3p					0.0574163	0.0701754	2	0.0637959	0
								mmu-miR-300-3p					0.0606061	0.0632642	2	0.0619351	0
								mmu-miR-877-5p					0.062201	0.0414673	2	0.0518341	0
								mmu-miR-21a-3p					0.0669856	0.0244551	2	0.0457204	0
								mmu-miR-290a-5p					0.0701754	0.0749601	2	0.0725678	0
								mmu-miR-130b-3p					0.0717703	0.0356194	2	0.0536948	0
								mmu-miR-106b-3p					0.0733652	0.00797448	2	0.0406699	0
								mmu-miR-7a-1-3p	0.0169492						1	0.0169492	0
								mmu-miR-15a-5p	0.0219342						1	0.0219342	1
								mmu-miR-543-3p		0.00266667					1	0.00266667	1
								mmu-miR-370-3p		0.00533333					1	0.00533333	0
								mmu-miR-337-5p		0.008					1	0.008	1
								mmu-miR-466h-5p		0.0106667					1	0.0106667	0
								mmu-miR-467d-5p		0.0133333					1	0.0133333	1
								mmu-miR-7b-5p		0.0186667					1	0.0186667	1
								mmu-miR-381-3p		0.0213333					1	0.0213333	1
								mmu-miR-216a-5p		0.024					1	0.024	1
								mmu-miR-431-5p		0.0453333					1	0.0453333	1
								mmu-miR-202-3p		0.048					1	0.048	1
								mmu-miR-423-3p		0.0533333					1	0.0533333	1
								mmu-miR-539-5p		0.056					1	0.056	1
								mmu-miR-411-3p		0.0586667					1	0.0586667	1
								mmu-miR-682		0.0613333					1	0.0613333	1
								mmu-miR-135b-5p		0.064					1	0.064	1
								mmu-miR-7a-5p		0.0693333					1	0.0693333	1
								mmu-miR-544-3p		0.0746667					1	0.0746667	1
								mmu-miR-582-5p		0.0773333					1	0.0773333	0
								mmu-miR-450a-5p		0.08					1	0.08	1
								mmu-miR-667-3p		0.0826667					1	0.0826667	1
								mmu-miR-210-3p		0.088					1	0.088	1
								mmu-miR-124-3p		0.0933333					1	0.0933333	1
								mmu-miR-361-5p		0.096					1	0.096	1
								mmu-miR-376b-3p		0.0986667					1	0.0986667	0
								mmu-miR-100-5p			0.00529101				1	0.00529101	0
								mmu-miR-574-3p				0.0130208			1	0.0130208	1
								mmu-miR-411-5p				0.0442708			1	0.0442708	1
								mmu-miR-551b-3p				0.046875			1	0.046875	0
								rno-miR-743b-3p				0.0494792			1	0.0494792	0
								mmu-miR-434-3p				0.0520833			1	0.0520833	0
								mmu-miR-434-5p				0.0546875			1	0.0546875	2
								mmu-miR-466a-3p					0.00318979		1	0.00318979	0
								mmu-miR-212-3p					0.00478469		1	0.00478469	1
								mmu-miR-184-3p					0.0111643		1	0.0111643	1
								mmu-miR-744-5p					0.0191388		1	0.0191388	0
								mmu-miR-18a-3p					0.0239234		1	0.0239234	1
								mmu-miR-505-3p					0.0255183		1	0.0255183	1
								mmu-miR-296-5p					0.0318979		1	0.0318979	0
								mmu-miR-677-5p					0.0350877		1	0.0350877	1
								mmu-miR-20a-3p					0.0366826		1	0.0366826	0
								mmu-miR-450a-2-3p					0.0382775		1	0.0382775	0
								mmu-miR-297a-3p					0.0430622		1	0.0430622	1
								mmu-miR-1901					0.0494418		1	0.0494418	0
								mmu-miR-341-3p					0.0510367		1	0.0510367	1
								mmu-miR-669b-5p					0.0526316		1	0.0526316	0
								mmu-miR-468-3p					0.0542265		1	0.0542265	0
								mmu-miR-34c-3p					0.0590112		1	0.0590112	1
								mmu-miR-802-5p					0.0653907		1	0.0653907	1
								mmu-miR-883a-5p					0.0685805		1	0.0685805	1
								mmu-miR-511-3p						0.000531632	1	0.000531632	0
								mmu-miR-375-3p						0.00106326	1	0.00106326	0
								mmu-miR-466b-3p						0.00212653	1	0.00212653	0
								mmu-miR-421-3p						0.00318979	1	0.00318979	0
								mmu-miR-290b-3p						0.00425306	1	0.00425306	0
								mmu-miR-467b-5p						0.00691122	1	0.00691122	0
								mmu-miR-1949						0.00956938	1	0.00956938	0
								mmu-miR-7211-3p						0.0143541	1	0.0143541	0
								mmu-let-7i-5p						0.0148857	1	0.0148857	0
								mmu-miR-5121						0.0154173	1	0.0154173	0
								mmu-miR-125a-3p						0.0164806	1	0.0164806	0
								mmu-miR-136-5p						0.0170122	1	0.0170122	0
								mmu-miR-6929-3p						0.0175439	1	0.0175439	0
								mmu-miR-155-5p						0.0180755	1	0.0180755	0
								mmu-miR-674-5p						0.0196704	1	0.0196704	0
								mmu-miR-34c-5p						0.0212653	1	0.0212653	1
								mmu-miR-676-3p						0.0217969	1	0.0217969	0
								mmu-miR-28a-3p						0.0228602	1	0.0228602	0
								mmu-miR-7069-5p						0.0239234	1	0.0239234	0
								mmu-miR-7235-5p						0.0249867	1	0.0249867	0
								mmu-miR-182-5p						0.0255183	1	0.0255183	0
								mmu-miR-3474						0.02605	1	0.02605	0
								mmu-miR-7118-5p						0.0265816	1	0.0265816	0
								mmu-miR-8101						0.0271132	1	0.0271132	0
								mmu-miR-34b-5p						0.0281765	1	0.0281765	0
								mmu-miR-669f-3p						0.0287081	1	0.0287081	0
								mmu-miR-17-3p						0.0313663	1	0.0313663	0
								mmu-miR-149-3p						0.0324296	1	0.0324296	0
								mmu-miR-721						0.0329612	1	0.0329612	0
								mmu-miR-211-3p						0.0334928	1	0.0334928	0
								mmu-miR-5126						0.0340245	1	0.0340245	0
								mmu-miR-8110						0.0345561	1	0.0345561	0
								mmu-miR-6898-5p						0.0350877	1	0.0350877	0
								mmu-miR-2861						0.036151	1	0.036151	0
								mmu-miR-7040-5p						0.0366826	1	0.0366826	0
								mmu-miR-6538						0.0372142	1	0.0372142	0
								mmu-miR-6378						0.0377459	1	0.0377459	0
								mmu-let-7e-3p						0.0382775	1	0.0382775	0
								mmu-miR-3154						0.0388091	1	0.0388091	0
								mmu-miR-224-5p						0.0393408	1	0.0393408	0
								mmu-miR-3082-5p						0.0398724	1	0.0398724	0
								mmu-miR-1839-3p						0.040404	1	0.040404	0
								mmu-miR-125b-5p						0.0409357	1	0.0409357	0
								mmu-miR-31-5p						0.0419989	1	0.0419989	0
								mmu-miR-7044-5p						0.0425306	1	0.0425306	0
								mmu-miR-301a-3p						0.0430622	1	0.0430622	0
								mmu-miR-8109						0.0435938	1	0.0435938	0
								mmu-miR-20b-5p						0.0441255	1	0.0441255	0
								mmu-miR-671-5p						0.0446571	1	0.0446571	0
								mmu-miR-3077-5p						0.0451887	1	0.0451887	0
								mmu-miR-7015-5p						0.046252	1	0.046252	0
								mmu-miR-6931-5p						0.0467836	1	0.0467836	0
								mmu-miR-3102-5p						0.0473153	1	0.0473153	0
								mmu-miR-181d-5p						0.0478469	1	0.0478469	0
								mmu-miR-7686-5p						0.0483785	1	0.0483785	0
								mmu-miR-7036a-5p						0.0494418	1	0.0494418	0
								mmu-miR-3960						0.0499734	1	0.0499734	0
								mmu-miR-7226-5p						0.0505051	1	0.0505051	0
								mmu-miR-19b-3p						0.0510367	1	0.0510367	0
								mmu-miR-466i-5p						0.0515683	1	0.0515683	0
								mmu-miR-714						0.0526316	1	0.0526316	0
								mmu-miR-1947-3p						0.0531632	1	0.0531632	0
								mmu-miR-328-5p						0.0536948	1	0.0536948	0
								mmu-miR-96-5p						0.0542265	1	0.0542265	0
								mmu-miR-6769b-5p						0.0547581	1	0.0547581	0
								mmu-miR-3081-5p						0.0552897	1	0.0552897	0
								mmu-miR-5099						0.0558214	1	0.0558214	0
								mmu-miR-494-3p						0.056353	1	0.056353	0
								mmu-miR-3547-5p						0.0568846	1	0.0568846	0
								mmu-miR-5128						0.0574163	1	0.0574163	0
								mmu-miR-7687-5p						0.0579479	1	0.0579479	0
								mmu-miR-1967						0.0584795	1	0.0584795	0
								mmu-miR-24-2-5p						0.0590112	1	0.0590112	0
								mmu-miR-1907						0.0595428	1	0.0595428	0
								mmu-miR-700-3p						0.0600744	1	0.0600744	0
								mmu-miR-135a-1-3p						0.0606061	1	0.0606061	0
								mmu-miR-770-3p						0.0611377	1	0.0611377	0
								mmu-miR-3091-5p						0.062201	1	0.062201	0
								mmu-miR-483-5p						0.0637959	1	0.0637959	0
								mmu-miR-710						0.0653907	1	0.0653907	0
								mmu-miR-6984-3p						0.0659224	1	0.0659224	0
								mmu-miR-3473c						0.0669856	1	0.0669856	0
								mmu-miR-6392-3p						0.0675173	1	0.0675173	0
								mmu-miR-5131						0.0685805	1	0.0685805	0
								mmu-miR-7005-5p						0.0691122	1	0.0691122	0
								mmu-miR-1224-5p						0.0696438	1	0.0696438	0
								mmu-miR-3472						0.0707071	1	0.0707071	0
								mmu-miR-28a-5p						0.0712387	1	0.0712387	0
								mmu-miR-8095						0.0717703	1	0.0717703	0
								mmu-miR-1897-3p						0.072302	1	0.072302	0
								mmu-miR-16-5p						0.0728336	1	0.0728336	0
								mmu-miR-3102-5p.2-5p						0.0733652	1	0.0733652	0
								mmu-miR-3058-3p						0.0738969	1	0.0738969	0
								mmu-miR-7047-3p						0.0744285	1	0.0744285	0
								mmu-miR-188-5p						0.0754918	1	0.0754918	0
								mmu-miR-7018-5p						0.0760234	1	0.0760234	0
								mmu-miR-1982-5p						0.076555	1	0.076555	0
								mmu-miR-7033-5p						0.0770867	1	0.0770867	0
								mmu-miR-3473e						0.0776183	1	0.0776183	0
								mmu-miR-5622-3p						0.0781499	1	0.0781499	0
								mmu-miR-143-5p						0.0786816	1	0.0786816	0
								mmu-miR-5130						0.0792132	1	0.0792132	0
								mmu-miR-6516-3p						0.0797448	1	0.0797448	0

## Sheet: DN
Table S15. Interaction network between miRNAs and target genes in Diabetic nephropathy (DN)
miRNA-target miRTarBase
Node	Degree	Closeness	Betweenness	Eccentricity	ClusteringCoefficient	AverageShortestPathLength
hsa-miR-155-5p	56	0.411	0.306	5	0	2.42
hsa-miR-200c-3p	50	0.402	0.2	4	0	2.48
hsa-miR-21-5p	39	0.379	0.201	5	0	2.63
hsa-miR-200b-3p	39	0.384	0.108	5	0	2.59
hsa-miR-29b-3p	32	0.373	0.146	5	0	2.67
hsa-miR-27a-3p	22	0.364	0.0857	4	0	2.73
hsa-miR-30a-5p	22	0.342	0.0773	5	0	2.91
hsa-miR-221-3p	21	0.357	0.0871	5	0	2.79
hsa-miR-126-3p	19	0.356	0.067	5	0	2.8
hsa-miR-205-5p	19	0.362	0.079	4	0	2.75
hsa-miR-204-5p	18	0.356	0.0474	5	0	2.8
hsa-miR-135a-5p	14	0.336	0.0351	5	0	2.96
hsa-miR-30d-5p	14	0.34	0.0341	5	0	2.93
hsa-miR-150-5p	12	0.347	0.0481	5	0	2.87
PTEN	9	0.431	0.0803	4	0	2.31
hsa-miR-486-5p	8	0.339	0.0238	5	0	2.94
BCL2	8	0.384	0.0473	4	0	2.6
VEGFA	8	0.381	0.0522	4	0	2.61
hsa-miR-30e-5p	7	0.316	0.00837	6	0	3.15
hsa-miR-10a-5p	7	0.337	0.0234	5	0	2.96
SP1	6	0.367	0.0347	5	0	2.71
FOXO1	6	0.346	0.0247	5	0	2.88
RUNX2	6	0.348	0.0291	4	0	2.86
TP53	6	0.314	0.0246	5	0	3.17
SMAD2	6	0.358	0.0258	4	0	2.78
ZEB1	5	0.315	0.0112	5	0	3.16
NOTCH1	5	0.312	0.0107	5	0	3.19
SNAI1	5	0.292	0.00786	5	0	3.41
PIK3R1	5	0.365	0.0292	5	0	2.73
BMI1	4	0.327	0.0125	5	0	3.04
SOCS1	4	0.344	0.0186	5	0	2.9
ZEB2	4	0.32	0.0101	5	0	3.11
MYB	4	0.345	0.0163	5	0	2.89
CCNE2	4	0.316	0.00801	5	0	3.15
SMAD1	4	0.329	0.0165	4	0	3.02
DNMT1	4	0.325	0.0102	5	0	3.07
ETS1	4	0.35	0.0165	5	0	2.84
KRAS	4	0.362	0.0201	5	0	2.75
PIK3CG	4	0.304	0.00964	5	0	3.27
EZH2	4	0.302	0.0116	5	0	3.3
BCL6	4	0.337	0.0157	4	0	2.95
MYC	4	0.328	0.0197	5	0	3.03
SMAD4	4	0.331	0.012	5	0	3
SIRT1	4	0.324	0.0103	5	0	3.08
hsa-miR-186-5p	3	0.291	0.00894	5	0	3.43
hsa-miR-92b-3p	3	0.303	0.00235	5	0	3.28
hsa-miR-320c	3	0.241	0.00184	6	0	4.13
FOXO3	3	0.322	0.0103	5	0	3.09
E2F1	3	0.299	0.00388	5	0	3.33
APC	3	0.315	0.00617	5	0	3.16
BDNF	3	0.282	0.00393	6	0	3.53
RHOA	3	0.336	0.00857	5	0	2.96
DNMT3B	3	0.314	0.00413	5	0	3.17
DNMT3A	3	0.314	0.00413	5	0	3.17
PIK3R2	3	0.283	0.00287	5	0	3.52
ICAM1	3	0.334	0.0105	5	0	2.98
BECN1	3	0.284	0.00353	6	0	3.51
THRB	3	0.32	0.00727	5	0	3.11
ADAM12	3	0.314	0.00413	5	0	3.17
EGFR	3	0.301	0.00449	5	0	3.31
CASP3	3	0.304	0.00539	6	0	3.28
CXCR4	3	0.284	0.00333	5	0	3.51
SEPT7	3	0.306	0.00381	5	0	3.25
PTPRD	3	0.303	0.00264	5	0	3.29
LOX	3	0.314	0.00619	5	0	3.17
ROCK2	3	0.303	0.00264	5	0	3.29
LRP6	3	0.312	0.00714	5	0	3.19
PHLPP2	3	0.286	0.00277	5	0	3.48
MALAT1	3	0.305	0.00287	5	0	3.26
STAT1	3	0.304	0.0105	5	0	3.28
hsa-miR-450a-5p	2	0.248	0.000359	6	0	4.01
hsa-miR-484	2	0.277	0.000176	5	0	3.6
MEIS1	2	0.303	0.00231	6	0	3.29
MSH2	2	0.319	0.00421	5	0	3.12
SPRY2	2	0.294	0.00258	5	0	3.39
CDKN1C	2	0.265	0.000532	6	0	3.76
BNIP3L	2	0.273	0.000796	6	0	3.64
TBK1	2	0.3	0.00253	5	0	3.32
DKK2	2	0.281	0.00239	5	0	3.54
BMPR2	2	0.287	0.00116	5	0	3.47
FN1	2	0.293	0.000103	5	0	3.4
GATA4	2	0.293	0.000103	5	0	3.4
HNRNPK	2	0.277	0.00323	6	0	3.6
TET1	2	0.289	0.00313	5	0	3.44
ZFPM2	2	0.293	0.000103	5	0	3.4
MBNL1	2	0.269	0.000313	6	0	3.71
IL32	2	0.286	0.00176	5	0	3.48
MMP2	2	0.288	0.00272	5	0	3.46
TP73	2	0.267	0.00877	5	0	3.73
EZR	2	0.277	0.00078	5	0	3.6
TCF12	2	0.303	0.00231	6	0	3.29
TCF4	2	0.275	0.000554	5	0	3.63
RNF2	2	0.293	0.000103	5	0	3.4
JUN	2	0.324	0.00384	5	0	3.08
NTRK2	2	0.299	0.00155	5	0	3.33
FLT1	2	0.293	0.000103	5	0	3.4
CDC42	2	0.286	0.00151	5	0	3.48
RND3	2	0.293	0.000103	5	0	3.4
SMARCA4	2	0.319	0.00421	5	0	3.12
IGFBP2	2	0.275	0.000554	5	0	3.63
NCAM1	2	0.302	0.00225	5	0	3.3
NTF3	2	0.315	0.00385	5	0	3.16
IKBKB	2	0.293	0.000103	5	0	3.4
KLF9	2	0.302	0.00225	5	0	3.3
IFNG	2	0.288	0.00164	5	0	3.46
NOS3	2	0.33	0.00463	5	0	3.01
PRDM1	2	0.257	0.00153	6	0	3.88
MYD88	2	0.319	0.00421	5	0	3.12
RBAK	2	0.302	0.0019	5	0	3.3
UBQLN1	2	0.33	0.00463	5	0	3.01
ELMO2	2	0.293	0.000103	5	0	3.4
TCF7L1	2	0.293	0.000103	5	0	3.4
RIN2	2	0.293	0.000103	5	0	3.4
KLF11	2	0.293	0.000103	5	0	3.4
SHC1	2	0.293	0.000103	5	0	3.4
MMP9	2	0.286	0.00151	5	0	3.48
AKT2	2	0.299	0.00296	5	0	3.32
SH3PXD2A	2	0.33	0.00463	5	0	3.01
SUZ12	2	0.293	0.000103	5	0	3.4
SEC23A	2	0.293	0.000103	5	0	3.4
BCL9	2	0.271	0.000346	6	0	3.68
ITGA6	2	0.273	0.000875	6	0	3.64
FBN1	2	0.279	0.00103	5	0	3.56
PIN1	2	0.293	0.000103	5	0	3.4
ATG5	2	0.256	0.000105	6	0	3.89
GATA3	2	0.288	0.00164	5	0	3.46
CADM1	2	0.292	0.00268	5	0	3.41
NOD2	2	0.257	0.00107	6	0	3.88
SOCS6	2	0.319	0.00421	5	0	3.12
HMGCR	2	0.288	0.00164	5	0	3.46
MMP14	2	0.265	0.00105	6	0	3.75
hsa-miR-193a-5p	1	0.211	0	6	0	4.72
hsa-miR-486-3p	1	1	0	1	0	0.5
hsa-miR-129-2-3p	1	0.248	0	6	0	4.02
TGFB3	1	0.272	0	6	0	3.66
COL4A2	1	0.272	0	6	0	3.66
RPS7	1	0.275	0	6	0	3.62
NCAPG	1	0.275	0	6	0	3.62
DERL1	1	0.275	0	6	0	3.62
TUBB3	1	0.287	0	5	0	3.47
TOM1	1	0.263	0	6	0	3.79
PHB	1	0.267	0	5	0	3.72
LRRFIP1	1	0.275	0	6	0	3.62
MARCKS	1	0.275	0	6	0	3.62
PICALM	1	0.292	0	6	0	3.41
DHX40	1	0.292	0	6	0	3.41
CLDN1	1	0.292	0	6	0	3.41
SFPQ	1	0.272	0	6	0	3.66
SP4	1	0.267	0	5	0	3.72
SP3	1	0.267	0	5	0	3.72
MED1	1	0.266	0	5	0	3.74
GNAI2	1	0.254	0	6	0	3.92
MCL1	1	0.272	0	6	0	3.66
DDIT4	1	0.264	0	6	0	3.78
TSHZ3	1	0.292	0	6	0	3.41
BNIP3	1	0.264	0	6	0	3.78
TLE4	1	0.292	0	6	0	3.41
NT5E	1	0.255	0	6	0	3.9
TWF1	1	0.263	0	6	0	3.79
TWF2	1	0.263	0	6	0	3.79
TIAM1	1	0.275	0	6	0	3.62
PTPN13	1	0.287	0	5	0	3.47
NID1	1	0.272	0	6	0	3.66
IGF2	1	0.258	0	6	0	3.86
M6PR	1	0.263	0	6	0	3.79
IL1B	1	0.275	0	6	0	3.62
PLAT	1	0.275	0	6	0	3.62
RNF123	1	0.292	0	6	0	3.41
CKAP5	1	0.292	0	6	0	3.41
RCOR3	1	0.287	0	5	0	3.47
NASP	1	0.272	0	6	0	3.66
GCSAM	1	0.292	0	6	0	3.41
PIAS3	1	0.275	0	6	0	3.62
DUSP10	1	0.275	0	6	0	3.62
KDM3A	1	0.292	0	6	0	3.41
NOTCH3	1	0.258	0	6	0	3.86
MAP3K10	1	0.292	0	6	0	3.41
ADAM9	1	0.263	0	6	0	3.79
FMR1	1	0.264	0	6	0	3.78
MEF2A	1	0.292	0	6	0	3.41
CAB39	1	0.292	0	6	0	3.41
C16orf62	1	0.292	0	6	0	3.41
LIN7C	1	0.292	0	6	0	3.41
MORC3	1	0.292	0	6	0	3.41
INTS6	1	0.292	0	6	0	3.41
PRKAR1A	1	0.292	0	6	0	3.41
MRPS27	1	0.292	0	6	0	3.41
PBRM1	1	0.292	0	6	0	3.41
LCORL	1	0.292	0	6	0	3.41
FAM91A1	1	0.292	0	6	0	3.41
PHF14	1	0.292	0	6	0	3.41
TBC1D8B	1	0.292	0	6	0	3.41
PAK2	1	0.292	0	6	0	3.41
SLC33A1	1	0.292	0	6	0	3.41
DVL2	1	0.264	0	6	0	3.78
SRC	1	0.266	0	5	0	3.74
MTDH	1	0.255	0	6	0	3.9
DDAH1	1	0.275	0	6	0	3.62
SEMA6A	1	0.267	0	5	0	3.72
SMN1	1	0.275	0	6	0	3.62
HPGD	1	0.275	0	6	0	3.62
SERPINH1	1	0.272	0	6	0	3.66
ANXA1	1	0.264	0	6	0	3.78
SLC7A11	1	0.267	0	5	0	3.72
ATRX	1	0.287	0	5	0	3.47
ACSL4	1	0.266	0	5	0	3.74
BIRC5	1	0.258	0	6	0	3.86
LDLR	1	0.267	0	5	0	3.72
IL12A	1	0.275	0	6	0	3.62
UBE3C	1	0.255	0	6	0	3.9
FOXG1	1	0.278	0	6	0	3.58
COL5A2	1	0.272	0	6	0	3.66
NCSTN	1	0.225	0	6	0	4.42
SOCS3	1	0.264	0	6	0	3.78
DOCK3	1	0.253	0	6	0	3.93
SSSCA1	1	0.258	0	6	0	3.86
SERPINE1	1	0.252	0	6	0	3.95
CIT	1	0.253	0	6	0	3.93
ESRRA	1	0.252	0	6	0	3.96
TICAM2	1	0.275	0	6	0	3.62
STUB1	1	0.275	0	6	0	3.62
PRDX2	1	0.266	0	5	0	3.74
PDCD10	1	0.287	0	5	0	3.47
RPTOR	1	0.292	0	6	0	3.41
PTK2	1	0.252	0	6	0	3.96
FASN	1	1	0	1	0	0.5
SKP2	1	0.255	0	6	0	3.9

## Sheet: FSGS
Table S16. Interaction network between miRNAs and target genes in Focal segmental glomerulosclerosis (FSGS)
miRNA-target miRTarBase
Node	Degree	Closeness	Betweenness	Eccentricity	ClusteringCoefficient	AverageShortestPathLength
hsa-let-7a-5p	5	0.7	0.857	3	0	1.25
hsa-miR-490-3p	2	0.438	0.286	3	0	2
HMGA2	2	0.583	0.476	2	0	1.5
ITGB3	1	0.438	0	4	0	2
APP	1	0.438	0	4	0	2
CDKN1A	1	0.438	0	4	0	2
RRM2	1	0.438	0	4	0	2
CCND1	1	0.318	0	4	0	2.75

## Sheet: GN
Table S17. Interaction network between miRNAs and target genes in Glomerulonephritis (GN)
miRNA-target miRTarBase
Node	Degree	Closeness	Betweenness	Eccentricity	ClusteringCoefficient	AverageShortestPathLength
hsa-miR-494-3p	11	0.333	0.204	5	0	2.92
hsa-miR-135a-5p	8	0.379	0.33	5	0	2.58
hsa-miR-451a	7	0.317	0.206	5	0	3.08
hsa-miR-342-3p	6	0.248	0.136	7	0	3.92
hsa-miR-486-5p	6	0.269	0.0706	7	0	3.63
hsa-miR-193b-3p	4	0.533	0.0136	3	0	1.67
hsa-miR-574-3p	4	0.236	0.0837	7	0	4.13
hsa-miR-374a-5p	4	0.533	0.0136	3	0	1.67
hsa-miR-197-3p	4	0.211	0.0837	7	0	4.63
hsa-miR-486-3p	3	1	0.00226	1	0	0.75
BCL2	3	0.371	0.115	4	0	2.63
MYC	3	0.371	0.115	4	0	2.63
CCND1	2	0.571	0.0121	2	0	1.56
PTEN	2	0.265	0.0125	6	0	3.67
AKT1	2	0.285	0.025	6	0	3.42
HOXA10	2	0.317	0.0303	6	0	3.08
ARHGAP5	2	0.265	0.0125	6	0	3.67
EGFR	2	0.293	0.106	6	0	3.33
IGF1R	2	0.265	0.0125	6	0	3.67
MAPK1	2	0.255	0.106	6	0	3.83
FOXO1	2	0.302	0.0478	6	0	3.23
E2F1	2	0.302	0.149	6	0	3.23
GEMIN4	1	0.2	0	8	0	4.88
CDK6	1	0.252	0	6	0	3.88
DNMT1	1	0.2	0	8	0	4.88
YWHAZ	1	0.364	0	4	0	2.44
RAD51	1	0.364	0	4	0	2.44
NF1	1	0.364	0	4	0	2.44
RAC1	1	0.192	0	8	0	5.08
EP300	1	0.192	0	8	0	5.08
SRCIN1	1	0.364	0	4	0	2.44
FOXJ3	1	0.252	0	6	0	3.88
RXRA	1	0.192	0	8	0	5.08
RAD23B	1	0.252	0	6	0	3.88
DCBLD2	1	0.242	0	6	0	4.03
ID4	1	0.2	0	8	0	4.88
TXNIP	1	0.277	0	6	0	3.52
CEBPB	1	0.364	0	4	0	2.44
SREBF2	1	0.2	0	8	0	4.88
PMAIP1	1	0.175	0	8	0	5.58
MTHFD1	1	0.175	0	8	0	5.58
FOXJ2	1	0.175	0	8	0	5.58
CDK4	1	0.213	0	8	0	4.58
KLF8	1	0.277	0	6	0	3.52
TAB2	1	0.2	0	8	0	4.88
TSC1	1	0.242	0	6	0	4.03
NRP2	1	0.213	0	8	0	4.58
MAF	1	0.6	0	2	0	1.25
LDHA	1	0.364	0	4	0	2.44
MAP3K1	1	0.242	0	6	0	4.03
FASN	1	0.6	0	2	0	1.25
PRKCD	1	0.6	0	2	0	1.25
BIRC5	1	0.252	0	6	0	3.88

## Sheet: IgAN
Table S18. Interaction network between miRNAs and target genes in IgA nephropathy (IgAN)
miRNA-target miRTarBase
Node	Degree	Closeness	Betweenness	Eccentricity	ClusteringCoefficient	AverageShortestPathLength
hsa-miR-155-5p	79	0.438	0.431	5	0	2.27
hsa-miR-21-5p	52	0.393	0.252	5	0	2.53
hsa-miR-16-5p	40	0.377	0.154	5	0	2.64
hsa-let-7a-5p	30	0.361	0.126	5	0	2.76
hsa-miR-15a-5p	29	0.365	0.0768	5	0	2.73
hsa-miR-221-3p	25	0.363	0.0807	5	0	2.75
hsa-miR-107	24	0.364	0.0868	5	0	2.74
hsa-miR-106b-5p	24	0.359	0.0823	5	0	2.77
hsa-miR-223-3p	22	0.354	0.0757	5	0	2.81
hsa-miR-15b-5p	21	0.34	0.0584	5	0	2.93
hsa-miR-19b-3p	11	0.317	0.0307	7	0	3.14
hsa-miR-129-5p	10	0.331	0.0265	5	0	3
hsa-miR-193b-3p	9	0.319	0.0239	5	0	3.12
hsa-miR-150-5p	9	0.343	0.0264	5	0	2.9
hsa-miR-146b-5p	9	0.301	0.0283	5	0	3.31
VEGFA	8	0.358	0.0407	6	0	2.78
hsa-miR-134-5p	7	0.327	0.0177	5	0	3.05
CCND1	7	0.374	0.0375	6	0	2.66
PTEN	7	0.394	0.0446	6	0	2.53
MYB	6	0.37	0.0349	6	0	2.69
WEE1	6	0.378	0.034	6	0	2.63
hsa-miR-425-5p	5	0.322	0.00202	5	0	3.1
CCND2	5	0.383	0.0315	4	0	2.6
RECK	5	0.338	0.016	6	0	2.95
KRAS	5	0.37	0.0312	4	0	2.69
TP53	5	0.307	0.012	6	0	3.24
FOXO1	5	0.336	0.0177	5	0	2.97
BCL2	4	0.323	0.00969	6	0	3.08
APP	4	0.315	0.00926	4	0	3.16
CDK6	4	0.315	0.0125	4	0	3.16
SOCS1	4	0.364	0.0204	6	0	2.73
E2F1	4	0.33	0.012	4	0	3.02
BACE1	4	0.301	0.00766	6	0	3.31
PURA	4	0.298	0.00404	6	0	3.34
HMGA2	4	0.314	0.00906	4	0	3.17
IL6	4	0.3	0.0112	4	0	3.32
SP1	4	0.31	0.011	5	0	3.21
STAT3	4	0.33	0.012	4	0	3.02
hsa-miR-320c	3	0.221	0.00815	7	0	4.5
BCL2L11	3	0.285	0.00267	6	0	3.5
CCNE1	3	0.285	0.00107	6	0	3.49
FOXO3	3	0.337	0.0101	4	0	2.96
ESR1	3	0.277	0.00266	6	0	3.6
SOX5	3	0.316	0.00639	6	0	3.15
APC	3	0.329	0.0139	6	0	3.02
KIT	3	0.278	0.00577	6	0	3.58
PRDM1	3	0.283	0.0118	6	0	3.52
AKT3	3	0.285	0.00107	6	0	3.49
CADM1	3	0.316	0.00639	6	0	3.15
DICER1	3	0.302	0.00689	4	0	3.3
ICAM1	3	0.359	0.0124	6	0	2.78
HIF1A	3	0.338	0.0105	6	0	2.95
MAFB	3	0.323	0.00665	4	0	3.08
NFIA	3	0.312	0.00605	5	0	3.19
FBXW7	3	0.339	0.0121	4	0	2.94
CASP3	3	0.328	0.014	4	0	3.03
CASP8	3	0.318	0.00677	4	0	3.13
CHUK	3	0.297	0.00463	5	0	3.36
EGFR	3	0.31	0.00952	4	0	3.22
SMAD2	3	0.321	0.00677	6	0	3.1
AXIN2	3	0.296	0.00344	6	0	3.37
IFNG	3	0.285	0.00107	6	0	3.49
SMAD7	3	0.308	0.00505	6	0	3.23
PIK3R1	3	0.359	0.0124	6	0	2.78
CHEK1	3	0.285	0.00107	6	0	3.49
ABCB1	3	0.303	0.00664	6	0	3.29
SOCS3	3	0.298	0.00355	6	0	3.34
STAT1	3	0.328	0.0107	4	0	3.03
STMN1	2	0.281	0.00204	6	0	3.55
CDC25A	2	0.301	0.00194	6	0	3.31
WNT3A	2	0.279	0.00018	6	0	3.56
MYC	2	0.327	0.00589	4	0	3.04
MSH6	2	0.343	0.00759	6	0	2.9
MSH2	2	0.343	0.00759	6	0	2.9
TIMP3	2	0.299	0.0021	6	0	3.33
BRCA1	2	0.279	0.00018	6	0	3.56
MYBL1	2	0.319	0.00267	6	0	3.12
AGO4	2	0.327	0.00589	4	0	3.04
SERPINB5	2	0.299	0.0026	6	0	3.33
BMPR2	2	0.29	0.00196	6	0	3.43
NCOA3	2	0.29	0.00196	6	0	3.43
IGF2	2	0.277	0.00215	5	0	3.59
NFKB1	2	0.312	0.0102	6	0	3.19
RB1	2	0.28	0.000848	6	0	3.56
LIN28A	2	0.285	0.00123	4	0	3.5
CAPRIN1	2	0.292	0.003	5	0	3.41
TGFBR3	2	0.305	0.00328	4	0	3.27
IRAK1	2	0.29	0.00435	6	0	3.43
E2F2	2	0.327	0.00589	4	0	3.04
SELE	2	0.319	0.00267	6	0	3.12
SOX6	2	0.335	0.00732	6	0	2.98
SMARCA4	2	0.343	0.00759	6	0	2.9
BCL6	2	0.343	0.00759	6	0	2.9
FMR1	2	0.274	0.00212	6	0	3.64
JAK1	2	0.28	0.00111	6	0	3.56
MYD88	2	0.343	0.00759	6	0	2.9
SSX2IP	2	0.319	0.00267	6	0	3.12
SMAD3	2	0.31	0.00253	6	0	3.22
PAK2	2	0.31	0.00405	6	0	3.22
AGO1	2	0.285	0.00123	4	0	3.5
NF1	2	0.272	0.00112	6	0	3.66
SETD2	2	0.297	0.0018	6	0	3.35
EZH2	2	0.267	0.00544	6	0	3.73
UHRF1	2	0.27	0.00189	6	0	3.69
PARP1	2	0.281	0.00123	6	0	3.54
CARM1	2	0.284	0.00145	5	0	3.51
RAB1A	2	0.279	0.00107	6	0	3.57
THRB	2	0.306	0.000541	6	0	3.26
STAT5B	2	0.259	0.000337	6	0	3.85
OPRM1	2	0.277	0.00106	6	0	3.59
BDNF	2	0.279	0.00018	6	0	3.56
MMP2	2	0.28	0.000848	6	0	3.56
TNFRSF10B	2	0.305	0.00328	4	0	3.27
RET	2	0.274	0.00153	6	0	3.64
WNT4	2	0.28	0.00193	6	0	3.56
VIM	2	0.258	0.000685	6	0	3.86
hsa-let-7b-3p	1	0.247	0	5	0	4.02
hsa-miR-188-5p	1	1	0	1	0	0.5
hsa-miR-204-3p	1	1	0	1	0	0.5
RTN4	1	0.283	0	6	0	3.52
NCAPG	1	0.283	0	6	0	3.52
DERL1	1	0.283	0	6	0	3.52
MEIS1	1	0.305	0	6	0	3.27
PLAG1	1	0.267	0	6	0	3.73
ACVR2A	1	0.274	0	6	0	3.63
SMAD5	1	0.305	0	6	0	3.27
JARID2	1	0.305	0	6	0	3.27
MARCKS	1	0.283	0	6	0	3.52
FGF2	1	0.274	0	6	0	3.63
TRIM32	1	0.305	0	6	0	3.27
SMAD1	1	0.305	0	6	0	3.27
NARS	1	0.305	0	6	0	3.27
DHX40	1	0.305	0	6	0	3.27
CCNT2	1	0.274	0	6	0	3.63
JADE1	1	0.305	0	6	0	3.27
CAMTA1	1	0.249	0	6	0	4
NR1I2	1	0.266	0	6	0	3.75
BTG2	1	0.283	0	6	0	3.52
DMTF1	1	0.268	0	6	0	3.72
TP53INP1	1	0.305	0	6	0	3.27
PDCD4	1	0.283	0	6	0	3.52
BNIP3L	1	0.266	0	6	0	3.74
RASA1	1	0.283	0	6	0	3.52
NFATC2IP	1	0.305	0	6	0	3.27
PLAU	1	0.242	0	6	0	4.11
TSHZ3	1	0.305	0	6	0	3.27
MCL1	1	0.242	0	6	0	4.11
TLE4	1	0.305	0	6	0	3.27
CASP9	1	0.266	0	6	0	3.75
TOPORS	1	0.283	0	6	0	3.52
TP63	1	0.283	0	6	0	3.52
PPIF	1	0.283	0	6	0	3.52
TICAM1	1	0.266	0	6	0	3.74
EIF4A2	1	0.283	0	6	0	3.52
E2F3	1	0.265	0	6	0	3.76
SKI	1	0.305	0	6	0	3.27
CKAP5	1	0.305	0	6	0	3.27
CRKL	1	0.268	0	6	0	3.72
JUN	1	0.305	0	6	0	3.27
DOCK5	1	0.283	0	6	0	3.52
ZYX	1	0.274	0	6	0	3.63
EOMES	1	0.265	0	6	0	3.76
TLR2	1	0.241	0	8	0	4.13
PRKAA1	1	0.241	0	8	0	4.13
CCR7	1	0.266	0	6	0	3.75
COL4A1	1	0.283	0	6	0	3.52
TRPS1	1	0.266	0	6	0	3.74
FADD	1	0.305	0	6	0	3.27
PIM1	1	0.274	0	6	0	3.63
NOTCH2	1	0.267	0	6	0	3.73
PKD2	1	0.265	0	6	0	3.76
ANAPC16	1	0.305	0	6	0	3.27
C17orf80	1	0.305	0	6	0	3.27
MYLK	1	0.305	0	6	0	3.27
PSIP1	1	0.305	0	6	0	3.27
MEF2A	1	0.305	0	6	0	3.27
CAB39	1	0.305	0	6	0	3.27
CARD11	1	0.305	0	6	0	3.27
PCDH9	1	0.305	0	6	0	3.27
LIN7C	1	0.305	0	6	0	3.27
GPM6B	1	0.305	0	6	0	3.27
LRIF1	1	0.305	0	6	0	3.27
TAF5L	1	0.305	0	6	0	3.27
MORC3	1	0.305	0	6	0	3.27
PRKAR1A	1	0.305	0	6	0	3.27
CEP41	1	0.305	0	6	0	3.27
ACTR2	1	0.305	0	6	0	3.27
TRAK1	1	0.305	0	6	0	3.27
TBC1D14	1	0.305	0	6	0	3.27
GABARAPL1	1	0.305	0	6	0	3.27
MAP3K14	1	0.305	0	6	0	3.27
LCORL	1	0.305	0	6	0	3.27
RAB11FIP2	1	0.305	0	6	0	3.27
NOVA1	1	0.305	0	6	0	3.27
MYO1D	1	0.305	0	6	0	3.27
HBP1	1	0.305	0	6	0	3.27
GOLT1B	1	0.305	0	6	0	3.27
INPP5F	1	0.305	0	6	0	3.27
NSD3	1	0.305	0	6	0	3.27
RPS6KB1	1	0.274	0	6	0	3.63
PRDM4	1	0.274	0	6	0	3.63
CDS2	1	0.274	0	6	0	3.63
RRM2	1	0.266	0	6	0	3.75
SATB1	1	0.283	0	6	0	3.52
PRKCE	1	0.267	0	6	0	3.73
ECT2	1	0.262	0	6	0	3.8
AURKB	1	0.266	0	6	0	3.75
ATG16L1	1	0.265	0	6	0	3.76
CDK8	1	0.267	0	6	0	3.73
SEL1L	1	0.305	0	6	0	3.27
SNCG	1	0.267	0	6	0	3.73
CYB5A	1	0.262	0	6	0	3.8
SMURF1	1	0.254	0	6	0	3.92
CRIM1	1	0.254	0	6	0	3.92
MAP2K3	1	0.283	0	6	0	3.52
HSPA1B	1	0.268	0	6	0	3.72
ARG2	1	0.266	0	6	0	3.75
CLU	1	0.283	0	6	0	3.52
CDC27	1	0.262	0	6	0	3.8
ZNRF3	1	0.231	0	6	0	4.3
MFN2	1	0.265	0	6	0	3.76
DNMT1	1	0.241	0	8	0	4.13
CBX4	1	0.283	0	6	0	3.52
AGO2	1	0.254	0	6	0	3.92
SSSCA1	1	0.256	0	6	0	3.9
FGF5	1	1	0	1	0	0.5
DNM1L	1	0.283	0	6	0	3.52
NCSTN	1	0.274	0	6	0	3.63
TICAM2	1	0.283	0	6	0	3.52
CLOCK	1	0.267	0	6	0	3.73
IRF4	1	0.181	0	8	0	5.49
FZD6	1	0.283	0	6	0	3.52
MCRS1	1	0.249	0	6	0	4
ATF2	1	1	0	1	0	0.5
NLRP3	1	0.262	0	6	0	3.8
POLD3	1	0.256	0	6	0	3.9
HAX1	1	0.262	0	6	0	3.8
TGFB1	1	0.254	0	6	0	3.92
METTL13	1	0.274	0	6	0	3.63
PTENP1	1	0.265	0	6	0	3.76
GOLPH3	1	0.247	0	6	0	4.04
RARB	1	0.231	0	6	0	4.3
TBRG1	1	0.305	0	6	0	3.27
ERBB4	1	0.231	0	6	0	4.3
OIP5	1	0.254	0	6	0	3.92

## Sheet: LN
Table S19. Interaction network between miRNAs and target genes in Lupus nephritis (LN)
miRNA-target miRTarBase
Node	Degree	Closeness	Betweenness	Eccentricity	ClusteringCoefficient	AverageShortestPathLength
hsa-miR-20a-5p	47	0.391	0.215	5	0	2.54
hsa-miR-145-5p	41	0.385	0.229	5	0	2.59
hsa-miR-106b-5p	36	0.373	0.138	5	0	2.67
hsa-miR-19a-3p	33	0.346	0.121	6	0	2.88
hsa-miR-26a-5p	27	0.353	0.119	6	0	2.82
hsa-miR-221-3p	26	0.364	0.111	6	0	2.73
hsa-miR-106a-5p	26	0.352	0.0792	5	0	2.83
hsa-miR-29c-3p	25	0.364	0.128	5	0	2.73
hsa-miR-19b-3p	21	0.33	0.0523	6	0	3.02
hsa-miR-93-5p	20	0.34	0.0424	5	0	2.93
hsa-miR-223-3p	18	0.34	0.0695	6	0	2.93
hsa-miR-210-3p	15	0.31	0.0613	6	0	3.21
hsa-miR-144-3p	15	0.341	0.0585	6	0	2.92
hsa-miR-30b-5p	13	0.31	0.0479	6	0	3.22
PTEN	11	0.403	0.102	5	0	2.47
hsa-miR-451a	10	0.302	0.0447	6	0	3.3
hsa-miR-186-5p	10	0.322	0.0346	5	0	3.09
VEGFA	9	0.384	0.101	5	0	2.59
hsa-miR-296-5p	7	0.307	0.0208	5	0	3.24
hsa-miR-134-5p	6	0.282	0.0349	6	0	3.53
hsa-miR-663a	6	0.292	0.00676	6	0	3.41
CDKN1A	6	0.348	0.0237	5	0	2.86
TGFBR2	6	0.353	0.0304	6	0	2.82
SMAD4	6	0.336	0.0252	6	0	2.97
HIF1A	5	0.321	0.0213	6	0	3.1
BCL2L11	5	0.337	0.0146	5	0	2.96
E2F1	5	0.322	0.0122	6	0	3.09
RB1	5	0.342	0.0169	5	0	2.91
ESR1	5	0.34	0.0269	5	0	2.93
hsa-miR-425-5p	4	0.301	0.0141	6	0	3.31
hsa-miR-410-3p	4	0.253	0.00923	6	0	3.93
TCEAL1	4	0.317	0.00708	5	0	3.14
APP	4	0.318	0.00877	5	0	3.13
BCL2	4	0.316	0.0236	5	0	3.15
E2F3	4	0.34	0.0235	5	0	2.93
MAPK9	4	0.309	0.00311	6	0	3.22
MYC	4	0.332	0.0252	6	0	3
KAT2B	4	0.305	0.00621	6	0	3.26
SOCS1	4	0.298	0.0103	7	0	3.34
MMP2	4	0.316	0.0217	5	0	3.15
TP53	4	0.289	0.00815	7	0	3.44
WEE1	4	0.333	0.0116	5	0	2.99
NOTCH1	4	0.278	0.00947	6	0	3.59
DNMT1	4	0.314	0.013	6	0	3.17
STAT3	4	0.318	0.00998	6	0	3.13
TWIST1	4	0.287	0.014	6	0	3.47
hsa-miR-543	3	0.246	0.00864	6	0	4.05
TP53INP1	3	0.304	0.0031	6	0	3.27
STMN1	3	0.289	0.01	7	0	3.45
BMPR2	3	0.304	0.0032	6	0	3.27
BNIP3	3	0.307	0.011	5	0	3.25
FOXO3	3	0.294	0.00484	5	0	3.38
KIT	3	0.316	0.00539	5	0	3.15
MCL1	3	0.317	0.00841	5	0	3.14
NRAS	3	0.325	0.00872	6	0	3.07
ITGB8	3	0.319	0.00627	6	0	3.12
CPEB4	3	0.297	0.0111	6	0	3.36
ABCB1	3	0.274	0.00643	6	0	3.63
RBL2	3	0.305	0.002	6	0	3.26
ETS1	3	0.307	0.00748	5	0	3.24
SLC2A4	3	0.288	0.00366	6	0	3.46
ABCA1	3	0.296	0.00456	6	0	3.37
JAG1	3	0.298	0.00926	6	0	3.34
PURA	3	0.301	0.00162	6	0	3.31
APC	3	0.286	0.00188	6	0	3.48
MDM2	3	0.3	0.00963	5	0	3.32
IL6	3	0.283	0.00792	7	0	3.52
MYCN	3	0.295	0.00785	6	0	3.37
GJA1	3	0.305	0.00691	5	0	3.26
ATM	3	0.298	0.00686	6	0	3.34
SIRT1	3	0.288	0.011	5	0	3.46
RUNX3	3	0.305	0.002	6	0	3.26
ATG16L1	3	0.301	0.00162	6	0	3.31
SP1	3	0.312	0.0159	5	0	3.2
CFTR	3	0.302	0.00991	6	0	3.3
ZBTB4	3	0.3	0.00376	6	0	3.32
PKNOX1	3	0.304	0.0032	6	0	3.27
ZEB1	3	0.271	0.00994	7	0	3.67
hsa-miR-1260b	2	0.261	0.000525	6	0	3.81
KLF4	2	0.297	0.00528	5	0	3.35
RHOB	2	0.28	0.00586	7	0	3.55
EZH2	2	0.276	0.00172	7	0	3.6
HOXA5	2	0.28	0.00231	7	0	3.56
MYLIP	2	0.275	0.000755	6	0	3.62
COL4A2	2	0.277	0.00579	6	0	3.6
SMAD1	2	0.272	0.00407	7	0	3.66
DNMT3B	2	0.286	0.00257	5	0	3.49
XIST	2	0.267	0.00304	7	0	3.73
MAP3K2	2	0.278	0.00337	5	0	3.59
DKK2	2	0.269	0.00146	7	0	3.71
BBC3	2	0.275	0.00202	5	0	3.62
ATXN1	2	0.262	0.000233	7	0	3.8
ARID4B	2	0.275	0.000755	6	0	3.62
TUSC2	2	0.274	0.000734	6	0	3.64
ABCC1	2	0.282	0.00523	6	0	3.53
IFNB1	2	0.296	0.00289	6	0	3.37
IL10	2	0.284	0.00179	6	0	3.5
NAIP	2	0.297	0.00295	5	0	3.35
FGB	2	0.279	0.00196	5	0	3.57
FGA	2	0.279	0.00196	5	0	3.57
TGFB1	2	0.258	0.000707	7	0	3.86
CUL5	2	0.262	0.000233	7	0	3.8
TLR2	2	0.262	0.000233	7	0	3.8
FOXM1	2	0.221	0.00826	7	0	4.51
ERG	2	0.287	0.00723	6	0	3.47
CYP19A1	2	0.275	0.000755	6	0	3.62
CASP7	2	0.28	0.000453	6	0	3.55
MAP2K6	2	0.279	0.00826	6	0	3.57
NDUFA4	2	0.29	0.00473	5	0	3.43
SETD2	2	0.276	0.00113	6	0	3.6
LIMK1	2	0.291	0.000679	6	0	3.43
EPAS1	2	0.31	0.00364	6	0	3.21
MXD1	2	0.262	0.000233	7	0	3.8
MAP3K5	2	0.299	0.00186	6	0	3.33
TIMP2	2	0.291	0.000679	6	0	3.43
DAB2	2	0.277	0.00025	6	0	3.6
DLL4	2	0.26	0.00115	6	0	3.83
ITGB1	2	0.271	0.00344	6	0	3.67
CASP8	2	0.28	0.00195	5	0	3.55
TET2	2	0.286	0.00257	5	0	3.49
PDGFRB	2	0.277	0.00298	5	0	3.6
MYL9	2	0.263	0.000904	7	0	3.79
SOCS3	2	0.286	0.0018	7	0	3.49
MAFB	2	0.258	0.00124	7	0	3.86
MFN2	2	0.28	0.000453	6	0	3.55
RHOC	2	0.277	0.00025	6	0	3.6
BTK	2	0.255	0.00128	7	0	3.91
PLK1	2	0.249	0.00173	6	0	4
TUG1	2	0.29	0.00281	6	0	3.43
PTENP1	2	0.277	0.00025	6	0	3.6
hsa-miR-550a-5p	1	0.229	0	7	0	4.35
hsa-miR-485-5p	1	1	0	1	0	0.5
hsa-miR-361-3p	1	1	0	1	0	0.5
hsa-miR-625-3p	1	0.218	0	7	0	4.56
hsa-miR-671-5p	1	0.181	0	8	0	5.51
hsa-miR-484	1	0.214	0	8	0	4.66
ITCH	1	0.272	0	6	0	3.66
MECP2	1	0.257	0	7	0	3.87
TMOD3	1	0.278	0	6	0	3.58
LAMC1	1	0.267	0	6	0	3.72
GAPDH	1	0.267	0	6	0	3.72
MAP3K12	1	0.282	0	6	0	3.54
ARIH2	1	0.267	0	7	0	3.72
ERBB4	1	0.257	0	7	0	3.87
NCOA3	1	0.248	0	7	0	4.01
ICAM1	1	0.267	0	7	0	3.72
NFIA	1	0.254	0	7	0	3.92
BNIP2	1	0.282	0	6	0	3.54
SP3	1	0.254	0	7	0	3.92
EGLN3	1	0.282	0	6	0	3.54
FAS	1	0.261	0	6	0	3.82
DICER1	1	0.267	0	7	0	3.72
IGFBP1	1	0.267	0	6	0	3.72
SCRIB	1	0.235	0	6	0	4.23
CDC42	1	0.267	0	6	0	3.72
BAMBI	1	0.282	0	6	0	3.54
MSMO1	1	0.257	0	7	0	3.87
PSAP	1	0.257	0	7	0	3.87
CSNK2A1	1	0.244	0	6	0	4.08
JAK1	1	0.272	0	6	0	3.66
PKD2	1	0.272	0	6	0	3.66
GMFB	1	0.278	0	6	0	3.58
GOLM1	1	0.278	0	6	0	3.58
TMEM9B	1	0.278	0	6	0	3.58
AP1G1	1	0.278	0	6	0	3.58
MIXL1	1	0.278	0	6	0	3.58
TSPAN6	1	0.278	0	6	0	3.58
ABHD17C	1	0.278	0	6	0	3.58
DVL2	1	0.267	0	7	0	3.72
RAB11FIP1	1	0.254	0	6	0	3.92
ARHGAP12	1	0.282	0	6	0	3.54
TSG101	1	0.282	0	6	0	3.54
HIPK1	1	0.248	0	7	0	4.01
DPYSL2	1	0.257	0	7	0	3.87
MYO5A	1	0.278	0	6	0	3.58
PTTG1	1	0.244	0	6	0	4.08
UBE2C	1	0.282	0	6	0	3.54
DUSP2	1	0.282	0	6	0	3.54
RREB1	1	0.278	0	6	0	3.58
PRKCD	1	0.261	0	7	0	3.81
SSX2IP	1	0.267	0	7	0	3.72
BMP2	1	0.261	0	6	0	3.82
ACTB	1	0.278	0	6	0	3.58
E2F5	1	0.272	0	6	0	3.66
EGR2	1	0.282	0	6	0	3.54
IMPDH1	1	0.257	0	7	0	3.87
ACVR1	1	0.261	0	7	0	3.81
DIMT1	1	0.237	0	7	0	4.2
MCM3	1	0.237	0	7	0	4.2
LDHA	1	0.237	0	7	0	4.2
LDHB	1	0.237	0	7	0	4.2
CYB5A	1	0.254	0	7	0	3.92
LIN28B	1	0.261	0	7	0	3.81
DCBLD2	1	0.232	0	7	0	4.29
STAT5B	1	0.22	0	7	0	4.52
TTN	1	0.255	0	7	0	3.91
ULK1	1	0.261	0	6	0	3.82
ZFYVE9	1	0.282	0	6	0	3.54
ANKH	1	0.282	0	6	0	3.54
TRIM8	1	0.272	0	6	0	3.66
TNFRSF12A	1	0.257	0	7	0	3.87
REST	1	0.282	0	6	0	3.54
PTPN13	1	0.261	0	7	0	3.81
DDX6	1	0.278	0	6	0	3.58
MBNL2	1	0.237	0	7	0	4.21
SERPINH1	1	0.267	0	6	0	3.72
CHEK1	1	0.261	0	7	0	3.81
POLR3G	1	0.254	0	7	0	3.92
CD28	1	0.278	0	6	0	3.58
ZDHHC9	1	0.22	0	7	0	4.52
PHB	1	0.261	0	7	0	3.81
FAM129A	1	0.272	0	6	0	3.66
SPTBN1	1	0.278	0	6	0	3.58
SENP1	1	0.278	0	6	0	3.58
FLOT1	1	1	0	1	0	0.5
MBNL3	1	0.237	0	7	0	4.21
PDCD10	1	0.231	0	7	0	4.3
EIF2S1	1	0.237	0	7	0	4.21
SH2B1	1	1	0	1	0	0.5
EIF5A2	1	0.237	0	7	0	4.21
ADAM10	1	0.232	0	7	0	4.29
SET	1	0.278	0	6	0	3.58
HEY1	1	0.202	0	7	0	4.92
FBXO11	1	0.197	0	7	0	5.04
MAPK1	1	0.232	0	7	0	4.29
OXTR	1	0.232	0	7	0	4.29
PBX3	1	0.255	0	7	0	3.91
NASP	1	0.267	0	6	0	3.72
RND3	1	0.261	0	6	0	3.82
FRAT2	1	0.267	0	6	0	3.72
LRP6	1	0.267	0	6	0	3.72
CNOT6	1	0.267	0	6	0	3.72
MAP3K1	1	0.232	0	7	0	4.29
PLOD2	1	0.261	0	7	0	3.81
MSH3	1	0.278	0	6	0	3.58
PPM1B	1	0.244	0	6	0	4.08
TLR7	1	0.257	0	7	0	3.87
DAPK3	1	0.282	0	6	0	3.54
THSD7A	1	0.237	0	7	0	4.2

## Sheet: MCD
Table S20. Interaction network between miRNAs and target genes in Minimal change disease (MCD)
miRNA-target miRTarBase
Node	Degree	Closeness	Betweenness	Eccentricity	ClusteringCoefficient	AverageShortestPathLength
hsa-miR-21-5p	11	0.382	0.307	5	0	2.54
hsa-miR-30a-5p	6	0.26	0.0808	7	0	3.74
hsa-miR-30d-5p	5	0.343	0.146	5	0	2.83
TP53	5	0.315	0.135	6	0	3.09
hsa-miR-92a-3p	4	0.245	0.0631	7	0	3.97
hsa-miR-30e-5p	3	0.248	0.0276	7	0	3.91
hsa-miR-663a	3	0.337	0.101	5	0	2.89
SNAI1	3	0.283	0.0316	6	0	3.43
hsa-miR-373-3p	2	1	0.000784	1	0	0.667
hsa-miR-124-3p	2	1	0.000784	1	0	0.667
hsa-let-7e-5p	2	0.228	0.0259	7	0	4.26
hsa-miR-198	2	1	0.000784	1	0	0.667
hsa-miR-187-3p	2	0.238	0.0129	7	0	4.09
hsa-miR-638	2	0.245	0.0259	7	0	3.97
PLOD3	2	0.347	0.0834	4	0	2.8
CDKN1A	2	0.258	0.0259	6	0	3.77
HIPK3	2	0.202	0.00392	8	0	4.8
TP63	2	0.298	0.078	6	0	3.26
BCL6	2	0.288	0.0333	6	0	3.37
SOCS1	2	0.354	0.132	5	0	2.74
BCL9	2	0.274	0.0165	6	0	3.54
TNFRSF10B	2	0.288	0.0502	6	0	3.37
hsa-miR-572	1	0.206	0	7	0	4.71
hsa-miR-197-3p	1	1	0	1	0	0.5
hsa-miR-324-3p	1	1	0	1	0	0.5
hsa-miR-141-3p	1	1	0	1	0	0.5
hsa-miR-1246	1	1	0	1	0	0.5
RAD23B	1	0.667	0	2	0	1
FMOD	1	0.279	0	6	0	3.49
IQGAP1	1	0.667	0	2	0	1
GNAI2	1	0.258	0	6	0	3.77
TUSC2	1	1	0	1	0	0.5
DVL2	1	1	0	1	0	0.5
MYBL2	1	0.2	0	8	0	4.86
ROCK2	1	0.667	0	2	0	1
AVEN	1	0.207	0	8	0	4.69
TUBB4B	1	0.207	0	8	0	4.69
DDAH1	1	0.279	0	6	0	3.49
PTPN14	1	0.279	0	6	0	3.49
PCGF5	1	0.198	0	8	0	4.91
AURKB	1	0.187	0	8	0	5.2
RGS5	1	0.198	0	8	0	4.91
FGFR1	1	0.667	0	2	0	1
ZMPSTE24	1	1	0	1	0	0.5
PBX1	1	0.667	0	2	0	1
JAK1	1	0.667	0	2	0	1
PLD1	1	0.198	0	8	0	4.91
CEBPB	1	0.279	0	6	0	3.49
TLR3	1	0.279	0	6	0	3.49
STUB1	1	0.279	0	6	0	3.49
PRKAR1A	1	1	0	1	0	0.5
RAB38	1	0.207	0	8	0	4.69

## Sheet: MN
Table S21. Interaction network between miRNAs and target genes in Membranous nephropathy (MN)
miRNA-target miRTarBase
Node	Degree	Closeness	Betweenness	Eccentricity	ClusteringCoefficient	AverageShortestPathLength
hsa-miR-9-5p	69	0.342	0.137	5	0	2.92
hsa-miR-24-3p	63	0.325	0.119	7	0	3.08
hsa-miR-221-3p	60	0.331	0.105	5	0	3.02
hsa-miR-146a-5p	57	0.328	0.0945	5	0	3.05
hsa-miR-31-5p	54	0.315	0.0888	5	0	3.17
hsa-miR-204-5p	48	0.32	0.0805	7	0	3.12
hsa-miR-19a-3p	48	0.338	0.0815	5	0	2.95
hsa-let-7a-5p	47	0.335	0.0805	5	0	2.98
hsa-miR-22-3p	46	0.33	0.0884	5	0	3.03
hsa-miR-218-5p	43	0.317	0.0768	5	0	3.15
hsa-miR-143-3p	40	0.322	0.0674	5	0	3.1
hsa-miR-205-5p	38	0.321	0.0726	7	0	3.11
hsa-miR-27b-3p	36	0.31	0.0636	5	0	3.23
hsa-miR-148a-3p	35	0.326	0.0618	5	0	3.06
hsa-miR-214-3p	34	0.315	0.0605	5	0	3.17
hsa-miR-133b	33	0.32	0.0537	5	0	3.12
hsa-miR-98-5p	32	0.302	0.04	7	0	3.3
hsa-miR-185-5p	31	0.306	0.0528	7	0	3.26
hsa-miR-19b-3p	28	0.307	0.0319	6	0	3.25
hsa-miR-152-3p	25	0.307	0.0323	6	0	3.26
hsa-miR-25-3p	25	0.298	0.0313	6	0	3.35
hsa-miR-100-5p	23	0.279	0.034	6	0	3.58
hsa-miR-503-5p	22	0.317	0.0336	5	0	3.15
hsa-miR-103a-3p	22	0.28	0.028	7	0	3.57
hsa-miR-199a-3p	19	0.284	0.026	7	0	3.52
hsa-miR-135b-5p	18	0.269	0.0225	7	0	3.72
hsa-miR-146b-5p	18	0.276	0.0162	7	0	3.62
hsa-miR-148b-3p	16	0.263	0.00878	7	0	3.8
hsa-miR-99a-5p	14	0.265	0.014	7	0	3.77
hsa-miR-194-5p	14	0.272	0.0181	7	0	3.67
hsa-miR-199b-5p	13	0.27	0.0142	7	0	3.7
hsa-miR-196b-5p	13	0.269	0.0165	7	0	3.71
PTEN	13	0.312	0.0581	6	0	3.2
hsa-miR-28-5p	11	0.255	0.0135	7	0	3.91
hsa-miR-363-3p	10	0.285	0.00648	7	0	3.5
BCL2L11	10	0.317	0.0362	6	0	3.15
IGF1R	10	0.285	0.0275	6	0	3.5
hsa-miR-216a-5p	9	0.279	0.00574	7	0	3.58
hsa-miR-542-3p	9	0.252	0.0065	7	0	3.97
AKT1	9	0.291	0.03	6	0	3.43
hsa-miR-433-3p	8	0.267	0.0089	7	0	3.74
hsa-let-7i-5p	8	0.244	0.00419	7	0	4.09
hsa-miR-193a-5p	8	0.24	0.00884	7	0	4.17
hsa-miR-574-3p	8	0.264	0.0107	7	0	3.79
BCL2	8	0.307	0.0322	6	0	3.26
CDKN1A	8	0.285	0.0181	6	0	3.5
hsa-miR-532-5p	7	0.206	0.0127	7	0	4.85
hsa-miR-21-3p	7	0.249	0.0133	7	0	4.01
EGFR	7	0.291	0.0219	6	0	3.43
SIRT1	7	0.298	0.0209	6	0	3.35
SMAD4	7	0.297	0.0268	6	0	3.36
hsa-miR-324-5p	6	0.25	0.00371	7	0	4
hsa-miR-216b-5p	6	0.238	0.00616	7	0	4.19
hsa-miR-874-3p	6	0.216	0.0079	7	0	4.62
EZH2	6	0.277	0.0111	6	0	3.6
CCND1	6	0.303	0.0174	6	0	3.3
MET	6	0.285	0.0184	6	0	3.51
CREB1	6	0.284	0.0108	6	0	3.52
TP53	6	0.287	0.0151	6	0	3.48
MTOR	6	0.25	0.00476	7	0	3.99
hsa-miR-181d-5p	5	0.25	0.0037	7	0	4
hsa-miR-140-3p	5	1	3.3e-05	1	0	0.833
hsa-miR-1246	5	0.206	0.0101	7	0	4.86
hsa-miR-24-1-5p	5	0.227	0.00555	7	0	4.41
hsa-miR-29a-5p	5	0.258	0.00507	7	0	3.88
DNMT1	5	0.277	0.0095	6	0	3.61
CCNA2	5	0.287	0.0148	6	0	3.49
E2F2	5	0.292	0.0168	6	0	3.42
CDKN1B	5	0.289	0.0141	6	0	3.45
KRAS	5	0.273	0.00791	6	0	3.66
CDK6	5	0.281	0.0133	6	0	3.55
NOTCH1	5	0.29	0.00985	6	0	3.44
KIT	5	0.279	0.0113	6	0	3.57
TGFBR2	5	0.283	0.00951	6	0	3.53
SP1	5	0.283	0.0118	6	0	3.52
VEGFA	5	0.27	0.00884	6	0	3.7
ITGA5	5	0.276	0.00753	6	0	3.62
IL6	5	0.285	0.0081	6	0	3.5
RUNX2	5	0.276	0.0101	6	0	3.62
ERBB2	5	0.27	0.00821	6	0	3.7
WNT1	5	0.278	0.00756	6	0	3.59
hsa-miR-423-3p	4	0.262	0.000709	7	0	3.81
hsa-miR-99b-5p	4	0.231	0.00291	7	0	4.32
hsa-miR-151a-3p	4	0.222	0.00291	7	0	4.51
hsa-miR-505-3p	4	0.214	0.00281	7	0	4.66
hsa-miR-30c-2-3p	4	0.221	0.00291	7	0	4.51
hsa-miR-382-5p	4	0.238	0.00517	7	0	4.19
hsa-miR-29c-5p	4	0.216	0.00273	7	0	4.63
CXCR4	4	0.284	0.00725	6	0	3.52
MMP13	4	0.28	0.0123	6	0	3.57
RHOA	4	0.277	0.00924	6	0	3.6
MYC	4	0.278	0.00704	6	0	3.6
TLR2	4	0.276	0.00649	6	0	3.62
ETS1	4	0.283	0.00663	6	0	3.53
CCNE1	4	0.25	0.00342	6	0	4
AGO1	4	0.265	0.00318	6	0	3.76
NRAS	4	0.27	0.00393	6	0	3.69
TMED7	4	0.288	0.00747	6	0	3.47
ESR1	4	0.277	0.00497	6	0	3.6
NFKB1	4	0.271	0.00323	6	0	3.68
FOXO1	4	0.268	0.00547	6	0	3.73
HNF4A	4	0.269	0.00635	6	0	3.72
FGFR3	4	0.265	0.00643	6	0	3.77
KLF4	4	0.26	0.00358	6	0	3.84
CDC42	4	0.268	0.00398	6	0	3.72
SOCS1	4	0.268	0.00329	6	0	3.72
DICER1	4	0.283	0.0062	6	0	3.53
BMPR2	4	0.265	0.00661	6	0	3.77
MAFB	4	0.272	0.00549	6	0	3.68
TCEAL1	4	0.27	0.00295	6	0	3.7
DKK1	4	0.275	0.0055	6	0	3.63
TGFB1	4	0.274	0.00762	6	0	3.65
IGF2BP1	4	0.273	0.00779	6	0	3.66
UHRF1	4	0.281	0.00457	6	0	3.55
SMAD2	4	0.28	0.00867	6	0	3.57
FOXM1	4	0.257	0.00525	6	0	3.89
MALAT1	4	0.281	0.00594	6	0	3.55
STAT3	4	0.265	0.0108	6	0	3.77
BECN1	4	0.274	0.00497	6	0	3.65
IGF1	4	0.255	0.00281	6	0	3.92
MMP14	4	0.282	0.00788	6	0	3.54
FBXW7	4	0.27	0.00315	6	0	3.7
hsa-miR-361-5p	3	0.219	0.000738	7	0	4.56
hsa-miR-10b-3p	3	0.226	0.00266	7	0	4.42
hsa-miR-455-3p	3	0.198	0.00282	9	0	5.04
hsa-miR-339-3p	3	0.224	0.000322	7	0	4.46
CDH1	3	0.273	0.00366	6	0	3.66
AURKB	3	0.269	0.00265	6	0	3.71
HLA-G	3	0.256	0.000507	6	0	3.9
PLK1	3	0.258	0.00251	6	0	3.87
FOXO3	3	0.282	0.00427	6	0	3.55
WEE1	3	0.271	0.00437	6	0	3.68
DNMT3A	3	0.247	0.00249	6	0	4.04
ROCK1	3	0.263	0.00249	6	0	3.8
BCL2L2	3	0.269	0.0047	6	0	3.71
E2F1	3	0.266	0.003	6	0	3.75
RAVER2	3	0.257	0.00232	6	0	3.89
HMGA2	3	0.269	0.00406	6	0	3.71
ZEB1	3	0.244	0.00968	8	0	4.09
TLR4	3	0.251	0.000938	6	0	3.98
TGFBR1	3	0.263	0.00418	6	0	3.8
NTRK3	3	0.266	0.0067	6	0	3.75
ERBB4	3	0.265	0.00212	6	0	3.77
CASP3	3	0.259	0.000827	6	0	3.86
CD44	3	0.257	0.00124	6	0	3.89
MAPK1	3	0.258	0.00205	6	0	3.88
IKBKB	3	0.266	0.00375	6	0	3.76
KAT2B	3	0.26	0.000831	6	0	3.84
ICAM1	3	0.274	0.00447	6	0	3.64
HRAS	3	0.264	0.00231	6	0	3.79
SNAI1	3	0.266	0.00382	6	0	3.75
RET	3	0.268	0.0052	6	0	3.73
CXCL12	3	0.274	0.00447	6	0	3.64
BIRC5	3	0.262	0.0032	6	0	3.81
CCND2	3	0.268	0.00213	6	0	3.73
FAS	3	0.259	0.00293	6	0	3.85
CCL5	3	0.266	0.00486	6	0	3.76
CCKBR	3	0.256	0.000507	6	0	3.9
FSCN1	3	0.269	0.00314	6	0	3.71
RAC1	3	0.254	0.00199	6	0	3.93
SERPINE1	3	0.261	0.00288	6	0	3.83
MPL	3	0.259	0.00175	6	0	3.85
MDM2	3	0.269	0.00376	6	0	3.71
TWIST1	3	0.241	0.00157	6	0	4.15
PTGS2	3	0.265	0.00437	6	0	3.76
JAG1	3	0.26	0.004	6	0	3.84
CYR61	3	0.268	0.00447	6	0	3.73
CTGF	3	0.266	0.004	6	0	3.76
HIF1A	3	0.252	0.0016	6	0	3.97
SOX4	3	0.262	0.00297	6	0	3.81
FGFR1	3	0.265	0.00287	6	0	3.77
PSAP	3	0.275	0.00526	6	0	3.63
SMAD7	3	0.254	0.00144	6	0	3.94
HMGB1	3	0.27	0.00494	6	0	3.7
STMN1	3	0.282	0.00427	6	0	3.55
MMP9	3	0.266	0.00285	6	0	3.76
MYCN	3	0.261	0.00128	6	0	3.83
PAK1	3	0.272	0.0036	6	0	3.68
MXD1	3	0.256	0.00111	6	0	3.9
ALCAM	3	0.256	0.000507	6	0	3.9
RECK	3	0.261	0.00287	6	0	3.82
PIK3R1	3	0.263	0.00247	6	0	3.79
MAP3K9	3	0.263	0.00206	6	0	3.79
RAP1B	3	0.241	0.00135	7	0	4.14
RUNX1	3	0.279	0.00421	6	0	3.58
MMP2	3	0.274	0.00619	6	0	3.65
CD274	3	0.254	0.00164	6	0	3.93
TNFAIP3	3	0.268	0.00317	6	0	3.73
IL10	3	0.264	0.0035	6	0	3.78
GSK3B	3	0.258	0.0131	6	0	3.87
NRP1	3	0.271	0.0026	6	0	3.69
PIK3R3	3	0.245	0.00133	7	0	4.07
hsa-miR-455-5p	2	0.197	0.00253	9	0	5.06
hsa-miR-652-3p	2	0.196	0.00253	9	0	5.09
hsa-miR-22-5p	2	0.199	0.00253	7	0	5.01
RUNX3	2	0.247	0.00835	6	0	4.04
MEIS1	2	0.25	0.000921	8	0	3.99
HES1	2	0.258	0.00106	6	0	3.87
LATS2	2	0.257	0.00169	6	0	3.89
SMO	2	0.242	0.000339	6	0	4.12
GLI1	2	0.243	0.000374	6	0	4.11
POU2F2	2	0.266	0.0046	6	0	3.76
BCL6	2	0.266	0.00219	6	0	3.75
CHEK1	2	0.26	0.000965	6	0	3.84
ITGB3	2	0.257	0.000298	6	0	3.88
TRAF6	2	0.248	0.000202	6	0	4.02
IRAK1	2	0.248	0.000202	6	0	4.02
DNMT3B	2	0.246	0.00143	6	0	4.05
PRMT5	2	0.258	0.000498	6	0	3.86
BACE1	2	0.263	0.000757	6	0	3.79
PKM	2	0.261	0.0012	6	0	3.83
BRCA1	2	0.264	0.00111	6	0	3.79
PRDM1	2	0.268	0.00121	6	0	3.73
BMP7	2	0.249	0.000463	6	0	4.01
DHFR	2	0.261	0.000886	6	0	3.83
NR1I2	2	0.262	0.000723	6	0	3.82
VDR	2	0.262	0.00179	6	0	3.82
CDKN1C	2	0.255	0.000383	6	0	3.91
PPARA	2	0.268	0.00157	6	0	3.72
LAMC2	2	0.252	0.0013	6	0	3.97
MAPK14	2	0.256	0.00136	6	0	3.91
HMGA1	2	0.259	0.000869	6	0	3.85
MCL1	2	0.244	0.000439	6	0	4.09
FAF1	2	0.264	0.00111	6	0	3.79
E2F5	2	0.257	0.000774	6	0	3.89
DKK2	2	0.26	0.00122	6	0	3.84
TIMP3	2	0.256	0.000616	6	0	3.9
ERBB3	2	0.261	0.000932	6	0	3.83
ZEB2	2	0.265	0.0019	6	0	3.77
TNFSF10	2	0.255	0.000383	6	0	3.91
MAPK7	2	0.263	0.00131	6	0	3.8
ATXN1	2	0.256	0.000107	6	0	3.9
ACVR1B	2	0.253	0.0016	8	0	3.95
MAPK8	2	0.255	0.000971	6	0	3.92
PA2G4	2	0.249	0.000175	6	0	4.02
SELE	2	0.264	0.00131	6	0	3.78
HDAC4	2	0.268	0.00157	6	0	3.72
COL1A1	2	0.256	0.00122	6	0	3.9
NCOA3	2	0.249	0.0005	6	0	4.02
TUSC2	2	0.26	0.00102	6	0	3.85
FOS	2	0.256	0.00176	6	0	3.9
IGF2	2	0.26	0.0022	6	0	3.85
CASR	2	0.249	0.00208	6	0	4.01
BNIP3	2	0.256	0.000616	6	0	3.9
TRAPPC2B	2	0.237	0.0068	6	0	4.21
MMP16	2	0.247	0.000967	6	0	4.05
YY1	2	0.261	0.00113	6	0	3.83
NUMB	2	0.259	0.000937	6	0	3.85
NFAT5	2	0.259	0.000937	6	0	3.85
RDX	2	0.249	0.00148	6	0	4.01
ARPC5	2	0.265	0.00219	6	0	3.77
SIX1	2	0.259	0.0017	6	0	3.85
TIAM1	2	0.265	0.00219	6	0	3.77
TP73	2	0.246	0.000913	8	0	4.06
CDX2	2	0.265	0.000915	6	0	3.77
CORO1A	2	0.269	0.00163	6	0	3.71
EZR	2	0.256	0.00101	8	0	3.9
CDH2	2	0.248	0.000747	6	0	4.02
BDNF	2	0.265	0.0011	6	0	3.77
WASF3	2	0.258	0.00168	6	0	3.88
GJA1	2	0.26	0.00122	6	0	3.84
HK2	2	0.255	0.00104	6	0	3.91
FOXC1	2	0.259	0.000657	6	0	3.86
IL13	2	0.234	0.000236	8	0	4.26
OTUB1	2	0.221	0.00024	8	0	4.53
HIF1AN	2	0.245	0.00156	6	0	4.08
CUL5	2	0.256	0.000107	6	0	3.9
SATB2	2	0.261	0.00113	6	0	3.83
QKI	2	0.257	0.000946	6	0	3.89
PRKAA1	2	0.263	0.000757	6	0	3.79
SOST	2	0.256	0.00193	6	0	3.91
CTDSPL	2	0.221	7.72e-05	7	0	4.52
CCNG1	2	0.264	0.00114	6	0	3.78
TNF	2	0.262	0.00118	6	0	3.81
FLT1	2	0.236	0.000416	7	0	4.22
IRS1	2	0.255	0.000217	6	0	3.92
MGMT	2	0.252	0.000846	6	0	3.96
ACVR1	2	0.248	0.000163	6	0	4.03
BMI1	2	0.248	0.000747	6	0	4.02
ID2	2	0.261	0.00102	6	0	3.83
CCNJ	2	0.257	0.000774	6	0	3.89
ABCA1	2	0.261	0.00179	6	0	3.82
FGF2	2	0.255	0.000347	6	0	3.91
CYP19A1	2	0.249	0.0005	6	0	4.02
PRKCE	2	0.259	0.000937	6	0	3.85
PIK3CA	2	0.256	0.000722	6	0	3.9
CSF1	2	0.241	0.000127	7	0	4.14
CDK1	2	0.264	0.0022	6	0	3.78
SRSF1	2	0.256	0.00267	6	0	3.91
VIM	2	0.265	0.000915	6	0	3.77
COPS8	2	0.249	0.000511	6	0	4.01
SRC	2	0.261	0.00113	6	0	3.83
RAD51	2	0.256	0.000616	6	0	3.9
CARD10	2	0.264	0.00111	6	0	3.79
PAK4	2	0.256	0.00136	6	0	3.91
AR	2	0.256	0.00143	6	0	3.9
MLH1	2	0.245	0.000593	6	0	4.07
PSMD10	2	0.24	0.00132	6	0	4.16
TGFA	2	0.235	0.00132	7	0	4.24
BCL9	2	0.242	0.00106	6	0	4.13
NTRK2	2	0.265	0.0011	6	0	3.77
AQP3	2	0.236	0.00175	8	0	4.23
TFF1	2	0.241	0.00253	6	0	4.15
MAP4K4	2	0.264	0.00207	6	0	3.78
CD151	2	0.259	0.000659	6	0	3.86
REG4	2	0.253	0.000275	8	0	3.95
ELAVL1	2	0.269	0.00112	6	0	3.71
SMARCA5	2	0.221	7.72e-05	7	0	4.52
PDGFRA	2	0.245	0.000541	6	0	4.08
MTDH	2	0.249	0.000463	6	0	4.01
MYB	2	0.249	0.000408	6	0	4.02
HOXA1	2	0.221	7.72e-05	7	0	4.52
GRB10	2	0.253	0.000737	6	0	3.94
HMOX1	2	0.264	0.00181	6	0	3.79
FOXP1	2	0.269	0.00137	6	0	3.71
PIM1	2	0.247	0.000481	6	0	4.04
S1PR1	2	0.25	0.000222	6	0	3.99
STAT6	2	0.22	0.000331	8	0	4.53
HMGB3	2	0.258	0.00167	6	0	3.87
ABCB9	2	0.264	0.0022	6	0	3.78
FKBP5	2	0.221	7.72e-05	7	0	4.52
LZTS1	2	0.251	0.001	6	0	3.98
CBL	2	0.245	0.00027	6	0	4.08
SOCS3	2	0.265	0.000823	6	0	3.77
BSG	2	0.249	0.00506	6	0	4.02
BAX	2	0.257	0.000946	6	0	3.89
THBS2	2	0.245	0.000789	6	0	4.07
COL3A1	2	0.252	0.000688	6	0	3.96
TACC3	2	0.258	0.000706	6	0	3.87
NCSTN	2	0.246	0.00506	8	0	4.07
WNT4	2	0.246	0.00196	8	0	4.06
SLC2A1	2	0.252	0.000551	6	0	3.96
PDGFRB	2	0.273	0.00241	6	0	3.66
UCA1	2	0.259	0.00133	6	0	3.86
MEF2C	2	0.251	0.001	6	0	3.98
BCLAF1	2	0.253	0.00116	6	0	3.94
HDAC8	2	0.196	0.00071	8	0	5.1
PARP1	2	0.254	0.000964	6	0	3.93
NOTCH2	2	0.269	0.00112	6	0	3.71
FZD7	2	0.243	0.000856	6	0	4.12
PKNOX1	2	0.256	0.000107	6	0	3.9
MEF2D	2	0.258	0.00072	6	0	3.88
NOX4	2	0.261	0.00206	6	0	3.83
MTUS1	2	0.256	0.000107	6	0	3.9
ITGA3	2	0.242	0.00063	6	0	4.12
RARB	2	0.248	0.000202	6	0	4.02
E2F3	2	0.242	0.00182	6	0	4.12
JAK2	2	0.253	0.000231	6	0	3.95
CYBB	2	0.252	0.00101	6	0	3.97
hsa-miR-615-3p	1	1	0	1	0	0.5
hsa-miR-125b-2-3p	1	0.222	0	7	0	4.5
hsa-miR-423-5p	1	0.194	0	7	0	5.14
hsa-miR-361-3p	1	1	0	1	0	0.5
hsa-miR-340-3p	1	0.217	0	7	0	4.6
REST	1	0.255	0	6	0	3.92
CDK4	1	0.245	0	8	0	4.07
HOXA10	1	0.242	0	8	0	4.12
MYO6	1	0.244	0	6	0	4.1
NKIRAS2	1	0.251	0	6	0	3.98
PPP2R2A	1	0.24	0	6	0	4.17
CCNF	1	0.241	0	6	0	4.15
CCNE2	1	0.241	0	6	0	4.15
CDC25A	1	0.241	0	6	0	4.15
MBNL2	1	0.241	0	6	0	4.15
EFNA1	1	0.241	0	6	0	4.15
NUP93	1	0.241	0	6	0	4.15
MRPS27	1	0.241	0	6	0	4.15
EBP	1	0.241	0	6	0	4.15
SET	1	0.212	0	8	0	4.7
LRP1	1	0.243	0	8	0	4.11
GRB2	1	0.211	0	8	0	4.73
RAB34	1	0.255	0	6	0	3.92
HOXA5	1	0.253	0	6	0	3.95
MECP2	1	0.253	0	6	0	3.95
GPD1	1	0.219	0	8	0	4.56
NF2	1	0.251	0	6	0	3.98
APC	1	0.212	0	8	0	4.71
HOXB5	1	0.249	0	6	0	4.01
TRIM71	1	0.251	0	6	0	3.98
PTBP2	1	0.242	0	6	0	4.12
FNDC3B	1	0.244	0	6	0	4.1
DDX5	1	0.243	0	8	0	4.11
INPPL1	1	0.243	0	8	0	4.11
SNAI2	1	0.242	0	8	0	4.12
TRIB3	1	0.245	0	8	0	4.07
DDIT4	1	0.249	0	6	0	4.01
BNIP3L	1	0.249	0	6	0	4.01
TBK1	1	0.249	0	6	0	4.01
MYBL1	1	0.249	0	6	0	4.01
CREBZF	1	0.249	0	6	0	4.01
BRAP	1	0.249	0	6	0	4.01
ARIH2	1	0.249	0	6	0	4.01
BBC3	1	0.249	0	6	0	4.01
HMGXB4	1	0.249	0	6	0	4.01
ST14	1	0.236	0	6	0	4.22
MEIS2	1	0.242	0	8	0	4.12
LASP1	1	0.241	0	6	0	4.15
MLEC	1	0.245	0	8	0	4.07
APP	1	0.251	0	6	0	3.98
MAPK9	1	0.221	0	8	0	4.52
HIPK3	1	0.235	0	7	0	4.25
MYLIP	1	0.235	0	7	0	4.25
CDKN2A	1	0.245	0	8	0	4.07
CXCL8	1	0.247	0	6	0	4.05
RPS6KA5	1	0.246	0	6	0	4.06
TFRC	1	0.248	0	6	0	4.02
VOPP1	1	0.241	0	6	0	4.15
HOXC8	1	0.212	0	8	0	4.7
SIGMAR1	1	0.243	0	8	0	4.11
MTA2	1	0.247	0	6	0	4.05
CDK2	1	0.219	0	8	0	4.56
CYP1B1	1	0.236	0	6	0	4.22
KCNH2	1	0.242	0	6	0	4.12
POLD1	1	0.245	0	8	0	4.07
KLF13	1	0.24	0	6	0	4.17
JAZF1	1	0.24	0	6	0	4.17
HOXC13	1	0.24	0	6	0	4.17
MPRIP	1	0.24	0	6	0	4.17
FZD3	1	0.24	0	6	0	4.17
BIRC6	1	0.241	0	6	0	4.15
ACTN1	1	0.241	0	6	0	4.15
PPARG	1	0.236	0	6	0	4.22
SOCS4	1	0.232	0	8	0	4.3
ONECUT2	1	0.255	0	6	0	3.92
MAP2K3	1	0.24	0	6	0	4.17
MYCBP	1	0.248	0	6	0	4.02
IL32	1	0.243	0	8	0	4.11
CDKN3	1	0.247	0	6	0	4.05
ZNF763	1	0.181	0	8	0	5.5
EYA4	1	0.236	0	6	0	4.22
SRGAP1	1	0.24	0	6	0	4.17
AP1S2	1	0.242	0	8	0	4.12
EDEM1	1	0.242	0	8	0	4.12
FZD1	1	0.242	0	8	0	4.12
RAB22A	1	0.242	0	8	0	4.12
RAB40B	1	0.242	0	8	0	4.12
SERINC3	1	0.242	0	8	0	4.12
SERP1	1	0.242	0	8	0	4.12
TCF4	1	0.242	0	8	0	4.12
HBEGF	1	0.214	0	8	0	4.67
MAOA	1	0.248	0	6	0	4.02
RGS2	1	0.248	0	6	0	4.02
ATM	1	0.218	0	7	0	4.58
FURIN	1	0.245	0	8	0	4.07
ROBO1	1	0.241	0	6	0	4.15
CDC34	1	0.251	0	6	0	3.98
NRIP1	1	0.556	0	2	0	1.5
WDR4	1	0.23	0	7	0	4.35
EWSR1	1	0.251	0	6	0	3.98
ACVR2B	1	0.214	0	8	0	4.67
N4BP1	1	0.204	0	8	0	4.91
TEX261	1	0.204	0	8	0	4.91
E2F6	1	0.204	0	8	0	4.91
CAV1	1	0.219	0	8	0	4.56
MAP1LC3B	1	0.242	0	8	0	4.12
ELOVL6	1	0.242	0	8	0	4.12
PTMS	1	0.248	0	6	0	4.02
MACC1	1	0.244	0	6	0	4.1
PAX3	1	0.236	0	6	0	4.22
CCNT1	1	0.236	0	6	0	4.22
SMARCA2	1	0.221	0	8	0	4.52
FAIM	1	0.242	0	6	0	4.12
DAPK1	1	0.219	0	8	0	4.56
PPP2R5E	1	0.235	0	7	0	4.25
AP3B1	1	0.255	0	6	0	3.92
GALNT7	1	0.24	0	6	0	4.17
SRF	1	0.255	0	6	0	3.92
HOXB3	1	0.241	0	6	0	4.15
TRPS1	1	0.249	0	6	0	4.01
CERS2	1	0.249	0	6	0	4.01
KHSRP	1	0.236	0	6	0	4.22
ZNF217	1	0.245	0	8	0	4.07
LCOR	1	1	0	1	0	0.5
CTNNB1	1	0.24	0	6	0	4.17
SOCS5	1	0.255	0	6	0	3.92
TOB1	1	0.241	0	6	0	4.15
LAMC1	1	0.243	0	8	0	4.11
EFNB2	1	0.242	0	8	0	4.12
SUZ12	1	0.253	0	6	0	3.95
RAB13	1	0.253	0	6	0	3.95
MSMO1	1	0.253	0	6	0	3.95
PTPRK	1	0.242	0	6	0	4.12
RB1CC1	1	0.242	0	6	0	4.12
ATF4	1	0.24	0	6	0	4.17
CSNK2A1	1	0.193	0	8	0	5.19
RCOR1	1	0.248	0	6	0	4.02
WASF2	1	0.247	0	6	0	4.05
GCM1	1	0.235	0	7	0	4.25
RASA1	1	0.24	0	6	0	4.17
STK40	1	0.24	0	6	0	4.17
MCM2	1	0.24	0	6	0	4.17
PRDM16	1	0.242	0	6	0	4.12
STAT1	1	0.247	0	6	0	4.05
SLPI	1	0.247	0	6	0	4.05
CHMP2B	1	0.255	0	6	0	3.92
ABCC1	1	0.255	0	6	0	3.92
CD34	1	0.255	0	6	0	3.92
GPS1	1	0.196	0	8	0	5.09
HECTD2	1	0.249	0	6	0	4.01
SRGAP2	1	0.24	0	6	0	4.17
YES1	1	0.243	0	8	0	4.11
CDC25B	1	0.246	0	6	0	4.06
AGO2	1	0.209	0	8	0	4.77
PGRMC1	1	0.232	0	8	0	4.3
MAP2K4	1	0.23	0	7	0	4.35
H2AFX	1	0.245	0	8	0	4.07
EIF2S3	1	0.245	0	8	0	4.07
DEDD	1	0.245	0	8	0	4.07
STX16	1	0.245	0	8	0	4.07
PCNA	1	0.245	0	8	0	4.07
RAB5B	1	0.248	0	6	0	4.02
HIPK1	1	0.235	0	7	0	4.25
VPS4B	1	0.253	0	6	0	3.95
RAB14	1	0.253	0	6	0	3.95
PTPN9	1	0.245	0	8	0	4.07
PTPRF	1	0.245	0	8	0	4.07
L1CAM	1	0.247	0	6	0	4.05
HAS2	1	0.251	0	6	0	3.98
SH3PXD2A	1	0.245	0	8	0	4.07
ARHGAP19	1	0.245	0	8	0	4.07
ASF1B	1	0.24	0	6	0	4.17
SCARB1	1	0.234	0	8	0	4.26
SREBF1	1	0.234	0	8	0	4.26
MAP3K4	1	0.246	0	6	0	4.06
CAPNS1	1	0.209	0	8	0	4.77
RRM2	1	0.251	0	6	0	3.98
SDC1	1	0.244	0	6	0	4.1
STK3	1	0.242	0	6	0	4.12
SEMA6A	1	0.236	0	6	0	4.22
S100A8	1	0.245	0	8	0	4.07
PHLPP1	1	0.253	0	6	0	3.95
MXI1	1	0.245	0	8	0	4.07
HDAC1	1	0.178	0	8	0	5.62
XIAP	1	0.245	0	8	0	4.07
CCND3	1	0.241	0	6	0	4.15
RREB1	1	0.244	0	6	0	4.1
PPP2R5C	1	0.212	0	8	0	4.71
SSX2IP	1	0.249	0	6	0	4.01
INSIG1	1	0.245	0	8	0	4.07
MITF	1	0.241	0	6	0	4.15
WNT10B	1	0.246	0	6	0	4.06
KLF17	1	0.255	0	6	0	3.92
KLF5	1	0.244	0	6	0	4.1
DSC2	1	0.23	0	7	0	4.35
ATP2A2	1	0.23	0	7	0	4.35
HOXA9	1	0.212	0	8	0	4.7
MTMR3	1	0.209	0	8	0	4.77
SMAD1	1	0.243	0	8	0	4.11
RAB40C	1	0.251	0	6	0	3.98
ITGB8	1	0.246	0	6	0	4.06
VAV2	1	0.246	0	6	0	4.06
ETS2	1	0.212	0	8	0	4.7
CUL2	1	0.209	0	8	0	4.78
BUB1	1	0.185	0	8	0	5.41
DNAJA4	1	0.221	0	8	0	4.52
HIVEP1	1	0.222	0	8	0	4.5
ATR	1	0.234	0	8	0	4.26
RAB27A	1	0.24	0	6	0	4.17
ARC	1	0.234	0	8	0	4.26
DYRK1A	1	0.171	0	8	0	5.85
IMPDH1	1	0.253	0	6	0	3.95
NPEPL1	1	0.253	0	6	0	3.95
NF1	1	0.255	0	6	0	3.92
UBE2I	1	0.24	0	6	0	4.17
HDGF	1	0.24	0	6	0	4.17
USP47	1	0.242	0	8	0	4.12
ZHX1	1	0.221	0	8	0	4.52
EP300	1	0.209	0	8	0	4.78
BMP1	1	0.214	0	8	0	4.67
VEGFC	1	0.236	0	6	0	4.22
GLI2	1	0.241	0	6	0	4.15
LDHA	1	0.245	0	8	0	4.07
LDHB	1	0.245	0	8	0	4.07
RXRA	1	0.209	0	8	0	4.78
RB1	1	0.249	0	6	0	4.01
APAF1	1	0.249	0	6	0	4.01
CTCF	1	0.249	0	6	0	4.01
DYRK2	1	0.245	0	8	0	4.07
OTUD7B	1	0.241	0	6	0	4.15
ZBTB4	1	0.253	0	6	0	3.95
SMAD5	1	0.212	0	8	0	4.71
NCOR2	1	0.218	0	7	0	4.58
ACSL4	1	0.243	0	8	0	4.11
RAB1A	1	0.249	0	6	0	4.01
ZNF215	1	0.218	0	7	0	4.58
THAP2	1	0.218	0	7	0	4.58
SNCG	1	0.219	0	8	0	4.56
TAF9B	1	0.212	0	8	0	4.7
NLK	1	0.212	0	8	0	4.7
CCNL1	1	0.212	0	8	0	4.7
ADAM17	1	0.235	0	7	0	4.25
TBXA2R	1	0.24	0	6	0	4.17
EMSY	1	0.24	0	6	0	4.17
TNFRSF11A	1	0.241	0	6	0	4.15
TMPRSS3	1	0.242	0	8	0	4.12
TAGLN2	1	0.242	0	6	0	4.12
MFF	1	0.236	0	6	0	4.22
REV3L	1	0.23	0	7	0	4.35
SIVA1	1	0.253	0	6	0	3.95
LDLR	1	0.236	0	6	0	4.22
ATP6AP2	1	0.556	0	2	0	1.5
TXNIP	1	0.242	0	8	0	4.12
TNFRSF12A	1	0.253	0	6	0	3.95
ITPR1	1	0.242	0	8	0	4.12
FOXJ3	1	0.236	0	6	0	4.22
EDN1	1	0.232	0	8	0	4.3
ARID1A	1	0.24	0	6	0	4.17
BCL3	1	0.235	0	7	0	4.25
GABARAPL1	1	0.244	0	6	0	4.1
NFATC3	1	0.234	0	8	0	4.26
FANCA	1	0.241	0	6	0	4.15
MAT2A	1	0.2	0	8	0	5.01
NR2C2	1	0.244	0	6	0	4.1
MCM10	1	0.234	0	8	0	4.26
DUSP4	1	0.234	0	8	0	4.26
SP7	1	0.24	0	6	0	4.17
PTGES2	1	0.247	0	6	0	4.05
MID1	1	0.212	0	8	0	4.71
MTCH2	1	0.212	0	8	0	4.71
HNRNPD	1	0.216	0	8	0	4.62
NFIA	1	0.193	0	8	0	5.19
CDK9	1	0.178	0	8	0	5.62
CNOT6L	1	0.247	0	6	0	4.05
SIKE1	1	0.247	0	6	0	4.05
SREBF2	1	0.234	0	8	0	4.26
ERRFI1	1	0.246	0	6	0	4.06
THBS1	1	0.236	0	6	0	4.22
ARNT	1	0.249	0	6	0	4.01
TYMS	1	0.211	0	8	0	4.73
ZNRF3	1	0.216	0	8	0	4.62
DDX6	1	0.244	0	6	0	4.1
BMPR1B	1	0.248	0	6	0	4.02
COX2	1	0.247	0	6	0	4.05
NET1	1	0.248	0	6	0	4.02
AZIN1	1	0.211	0	8	0	4.73
DUSP1	1	0.247	0	6	0	4.05
LIMK1	1	0.244	0	6	0	4.1
TNFRSF10B	1	0.251	0	6	0	3.98
PHLPP2	1	0.243	0	8	0	4.11
PAPPA	1	0.24	0	6	0	4.17
EPHB2	1	0.234	0	8	0	4.26
MTHFD1	1	0.255	0	6	0	3.92
CADM1	1	0.24	0	6	0	4.17
RNF11	1	0.247	0	6	0	4.05
BTG1	1	0.248	0	6	0	4.02
RPS6KA3	1	0.241	0	6	0	4.15
LGR4	1	0.241	0	6	0	4.15
RHOB	1	0.253	0	6	0	3.95
GATA6	1	0.212	0	8	0	4.7
HSP90AA1	1	0.208	0	8	0	4.8
TGFBR3	1	0.251	0	6	0	3.98
GPRC5A	1	0.219	0	8	0	4.56
EI24	1	0.165	0	10	0	6.04
TP53INP1	1	0.253	0	6	0	3.95
YBX1	1	0.193	0	8	0	5.19
SOS1	1	0.247	0	6	0	4.05
ATG5	1	0.255	0	6	0	3.92
EVI5	1	0.212	0	8	0	4.71
NFIB	1	0.171	0	8	0	5.85
LMNA	1	0.243	0	8	0	4.11
CUL4A	1	0.255	0	6	0	3.92
ANGPTL2	1	0.185	0	8	0	5.4
TFAM	1	0.221	0	8	0	4.52
SH2B1	1	1	0	1	0	0.5
PLK2	1	0.236	0	6	0	4.22
NCAN	1	0.245	0	8	0	4.07
RBPMS	1	0.2	0	8	0	5.01
TRIM29	1	0.234	0	8	0	4.26
BCL2L1	1	0.242	0	6	0	4.12
NFATC1	1	0.244	0	6	0	4.1
ZBTB7A	1	0.218	0	7	0	4.58
CPM	1	0.247	0	6	0	4.05
ARF4	1	0.249	0	6	0	4.01
SNX6	1	0.232	0	8	0	4.3
TERT	1	0.171	0	8	0	5.85
ADAMTS6	1	0.249	0	6	0	4.01
ROR1	1	0.236	0	6	0	4.22
PBX3	1	0.232	0	8	0	4.3
CTTN	1	0.201	0	8	0	4.96
NLN	1	0.193	0	8	0	5.16
CXCR2	1	0.248	0	6	0	4.02
PRKCH	1	0.245	0	8	0	4.07
XRCC5	1	0.24	0	6	0	4.17
STIM1	1	0.234	0	8	0	4.26
LIN28B	1	0.251	0	6	0	3.98
CXCL2	1	0.171	0	8	0	5.85
ATF3	1	0.181	0	8	0	5.51
PRDX2	1	0.243	0	8	0	4.11
ZNF608	1	0.2	0	8	0	5.01
MTHFR	1	0.248	0	6	0	4.02
PAX8	1	0.216	0	8	0	4.62
CCL2	1	0.232	0	8	0	4.3
INO80	1	0.246	0	6	0	4.06
PDCD4	1	0.2	0	8	0	5.01
LLGL1	1	0.164	0	10	0	6.08
LFNG	1	0.247	0	6	0	4.05
IGF2BP3	1	0.255	0	6	0	3.92
SGPP2	1	0.24	0	6	0	4.17
PIK3CG	1	0.212	0	8	0	4.7
UBR5	1	0.248	0	6	0	4.02
RAB18	1	0.165	0	10	0	6.06
RNF144B	1	0.218	0	7	0	4.58
STAT5B	1	0.204	0	8	0	4.91
MTFR1	1	0.2	0	8	0	4.99
NUP214	1	0.242	0	6	0	4.12
TM4SF1	1	0.255	0	6	0	3.92
CBX7	1	0.255	0	6	0	3.92
PTBP1	1	0.242	0	6	0	4.12
BAG3	1	0.244	0	6	0	4.1
CAMKK2	1	0.255	0	6	0	3.92
TACC1	1	0.248	0	6	0	4.02
WT1	1	0.193	0	8	0	5.16
MARCKSL1	1	0.556	0	2	0	1.5
COL4A1	1	0.556	0	2	0	1.5
KDM5B	1	0.214	0	8	0	4.67
BAP1	1	0.24	0	6	0	4.17
FASLG	1	0.2	0	8	0	5.01
CYP2B6	1	0.23	0	7	0	4.35
VPS51	1	0.241	0	6	0	4.15
PRKAR1A	1	0.171	0	8	0	5.85
MTA1	1	0.248	0	6	0	4.02
STARD13	1	0.255	0	6	0	3.92
CPEB4	1	0.177	0	8	0	5.63
AXIN2	1	0.171	0	8	0	5.85
CLTC	1	0.209	0	8	0	4.78
GALNT4	1	0.255	0	6	0	3.92
MYOCD	1	0.255	0	6	0	3.92
YWHAZ	1	0.166	0	8	0	6.01
FN1	1	0.556	0	2	0	1.5
NKD1	1	0.171	0	8	0	5.85
SPRED1	1	0.24	0	6	0	4.17
SPRY1	1	0.24	0	6	0	4.17
SPRY4	1	0.24	0	6	0	4.17
CDK7	1	0.221	0	8	0	4.52
AKT2	1	0.244	0	6	0	4.1
GNA13	1	0.24	0	6	0	4.17
GDNF	1	0.255	0	6	0	3.92
MALT1	1	0.2	0	8	0	5
UVRAG	1	0.243	0	8	0	4.11
FASN	1	0.171	0	8	0	5.85
SYK	1	0.171	0	8	0	5.85
ACKR3	1	0.218	0	7	0	4.58
SGK1	1	0.242	0	6	0	4.12
WNK1	1	0.185	0	8	0	5.4
ATG14	1	0.235	0	7	0	4.25
PMEPA1	1	0.253	0	6	0	3.95
STAU1	1	0.255	0	6	0	3.92
PLAC8	1	0.234	0	8	0	4.26
ACLY	1	0.248	0	6	0	4.02
SEMA4D	1	0.24	0	6	0	4.17
CACNA1C	1	0.219	0	8	0	4.56
TAB1	1	0.205	0	8	0	4.87
KPNB1	1	0.255	0	6	0	3.92
DYRK1B	1	0.255	0	6	0	3.92
CTNND1	1	0.232	0	8	0	4.3
NFKB2	1	0.244	0	6	0	4.1
ITGB1	1	0.244	0	6	0	4.1
SLC31A1	1	0.232	0	8	0	4.3
SLC9A1	1	0.234	0	8	0	4.26
ZNRF2	1	0.218	0	7	0	4.58
TFAP2A	1	0.193	0	8	0	5.16
FAM83F	1	0.244	0	6	0	4.1
DVL3	1	0.242	0	8	0	4.12
MAP3K5	1	0.253	0	6	0	3.95
SLC1A2	1	0.24	0	6	0	4.17
PIN1	1	0.178	0	8	0	5.62
CHD1	1	0.214	0	8	0	4.67
CAMK2D	1	0.234	0	8	0	4.26
SLC8A1	1	0.234	0	8	0	4.26
NOS1	1	0.247	0	6	0	4.05
RPS6KB1	1	0.241	0	6	0	4.15
SLC5A5	1	0.216	0	8	0	4.62
AMFR	1	0.176	0	8	0	5.66
PPM1K	1	0.248	0	6	0	4.02
ARID3A	1	0.188	0	8	0	5.32
PLAUR	1	0.247	0	6	0	4.05
MBD2	1	0.249	0	6	0	4.01
SEMA4C	1	0.23	0	7	0	4.35
CPD	1	0.24	0	6	0	4.17
GLI3	1	0.242	0	6	0	4.12

## Sheet: murine UUO
Table S22. Interaction network between miRNAs and target genes in Murine UUO model
miRNA-target miRTarBase
Node	Degree	Closeness	Betweenness	Eccentricity	ClusteringCoefficient	AverageShortestPathLength
mmu-miR-29b-3p	10	0.253	0.303	9	0	3.88
mmu-miR-29c-3p	8	0.245	0.247	7	0	4
mmu-miR-200a-3p	7	0.217	0.265	11	0	4.51
mmu-miR-21a-5p	6	0.248	0.391	8	0	3.96
mmu-miR-200b-3p	6	0.16	0.00745	13	0	6.12
mmu-miR-132-3p	5	0.191	0.273	10	0	5.14
mmu-miR-146a-5p	5	0.231	0.171	7	0	4.24
mmu-miR-223-3p	5	0.146	0.133	12	0	6.71
Sirt1	4	0.251	0.376	10	0	3.9
Zeb2	4	0.183	0.0498	12	0	5.35
mmu-miR-199a-5p	3	0.236	0.114	9	0	4.16
mmu-miR-429-3p	3	0.157	0.00116	13	0	6.24
mmu-miR-221-3p	3	1	0.0021	1	0	0.75
Zeb1	3	0.182	0.0156	12	0	5.39
Flt1	3	0.182	0.0156	12	0	5.39
mmu-miR-146b-5p	2	0.24	0.106	9	0	4.08
mmu-miR-214-3p	2	0.219	0.0602	7	0	4.47
Pten	2	0.228	0.0677	7	0	4.29
Hif1a	2	0.193	0.0342	10	0	5.08
Yy1	2	0.242	0.111	7	0	4.06
Irak1	2	0.19	0.0342	8	0	5.16
Spry1	2	0.242	0.111	7	0	4.06
Hdac4	2	0.237	0.0279	8	0	4.14
Mmp9	2	0.216	0.28	9	0	4.53
Notch1	2	0.235	0.102	8	0	4.18
Foxo3	2	0.166	0.157	11	0	5.9
Cav2	2	0.237	0.0279	8	0	4.14
Insig1	2	0.237	0.0279	8	0	4.14
Akt3	2	0.237	0.0279	8	0	4.14
Dcx	2	0.181	0.00489	12	0	5.43
Pafah1b1	2	0.181	0.00489	12	0	5.43
Pkd1	2	0.181	0.00489	12	0	5.43
Bace1	2	0.237	0.0279	8	0	4.14
Scap	2	0.237	0.0279	8	0	4.14
Ctgf	2	0.222	0.0614	8	0	4.41
Rc3h1	2	0.233	0.107	7	0	4.22
mmu-miR-192-5p	1	0.155	0	13	0	6.31
mmu-miR-107-3p	1	0.162	0	11	0	6.04
mmu-miR-142a-3p	1	0.16	0	9	0	6.12
Peli1	1	0.199	0	9	0	4.92
Cdkn1b	1	0.6	0	2	0	1.25
Mecp2	1	0.161	0	11	0	6.1
Ddit4	1	0.6	0	2	0	1.25
Bbc3	1	0.202	0	10	0	4.84
Ptbp2	1	0.161	0	11	0	6.1
Gria2	1	0.128	0	13	0	7.67
Igf1r	1	0.128	0	13	0	7.67
Arnt	1	0.6	0	2	0	1.25
Map1b	1	0.189	0	8	0	5.2
Sox2	1	0.202	0	10	0	4.84
Il17rd	1	0.128	0	13	0	7.67
Sox4	1	0.161	0	11	0	6.1
Vegfa	1	0.202	0	10	0	4.84
Camk2d	1	0.189	0	8	0	5.2
Il6	1	0.128	0	13	0	7.67

[truncated: 1 more sheets: murine DKD]
